# Supplementary material for: Organocatalytic one-pot asymmetric synthesis of 2-aryl-2,3-dihydro-4-quinolones
Source: Royal Society of Chemistry journal article supplement (doi:10.1039/c6ra01247g), 2016-01-01

## Supporting Information

### Organocatalytic One-pot Asymmetric Synthesis of

### 2-Aryl-2,3-dihydro-4-quinolones

Gao-Fei Pan, Li Su, Yan-Lei Zhang, Shi-Huan Guo, and Yong-Qiang Wang\*

Key Laboratory of Synthetic and Natural Functional Molecule Chemistry of Ministry of Education,  
Department of Chemistry & Materials Science, Northwest University, Xi'an 710069, P. R. China  
<mailto:wangyq@nwu.edu.cn>

### Table of Contents

|                                                                          |     |
|--------------------------------------------------------------------------|-----|
| 1. General information.....                                              | S2  |
| 2. Experimental procedures and characterization data.....                | S3  |
| 3. References.....                                                       | S14 |
| 4. <sup>1</sup> H NMR and <sup>13</sup> C NMR spectra.....               | S15 |
| 5. HPLC spectra.....                                                     | S35 |
| 6. <sup>1</sup> HNMR, <sup>13</sup> CNMR and HRMS for the mechanism..... | S56 |
| 7. X-Ray structure of 3a, 3l.....                                        | S57 |

## 1 General information

All commercial reagents and solvents were used as received without further purification. Reactions were followed with TLC (0.254 mm silica gel 60-F plates). Visualization was accomplished with UV light. Flash chromatographies were carried out on silica gel 200-300 mesh. Optical rotations were reported as follows:  $[\alpha]_D^{27}$  (c g/100 mL, in solvent). Melting points (m. p.) were measured on electrothermal digital melting point apparatus and were uncorrected.  $^1\text{H}$ NMR and  $^{13}\text{C}$ NMR spectra were recorded at 400 MHz using  $\text{CDCl}_3$  or  $(\text{CD}_3)_2\text{SO}$  as solvent. Spectra were referenced internally to the residual proton resonance in  $\text{CDCl}_3$  ( $\delta$  7.26 ppm),  $(\text{CD}_3)_2\text{SO}$  ( $\delta$  2.50 ppm) or with tetramethylsilane (TMS,  $\delta$  0.00 ppm) as the internal standard. Chemical shifts ( $\delta$ ) were reported as part per million (ppm) in  $\delta$  scale downfield from TMS. Multiplicities are reported as follows: s = singlet, d = doublet, t = triplet, m = multiplet, br. s = broad singlet. Infrared (IR) data were recorded as films on potassium bromide plates on a Bruker Tensor 27 FT-IR spectrometer. Absorbance frequencies are reported in reciprocal centimeters ( $\text{cm}^{-1}$ ). High resolution mass spectra were acquired on a Bruker Daltonics MicroTof-QII mass spectrometer. X-ray crystal structure analyses were measured on Bruker Smart APEXIICCD instrument using Mo-K $\alpha$  radiation. The structures were solved and refined using the SHELXTL software package. High performance liquid chromatography (HPLC) analysis was performed on a SHIMADZU LC-2010AHT instrument equipped with a quaternary pump, using a Daicel Chiralcel AD column (250  $\times$  4.6 mm). UV absorption was monitored at 214 nm.

## 2. Experimental procedures and characterization data

### General procedure for 2-Aryl-2,3-dihydro-4-quinolones synthesis:

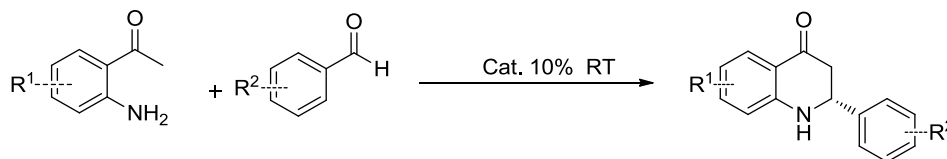

To a 1.5 mL test tube were added 0.01mmol (10 mmol%) of organocatalyst **4a**, 0.1 mmol of 2'-hydroxyacetophenones and 0.1 mmol of benzaldehydes. Then the reaction mixture was left at room temperature for sufficient time (based on monitoring by thin-layer chromatography), and finally purified by column chromatography with 10% EtOAc/hexanes as eluent to give the products (**3**).

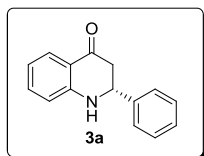

**(R)-2-phenyl-2,3-dihydroquinolin-4(1H)-one (3a)**<sup>[1,2,3]</sup> Prepared according to general procedure to afford as yellow solid (72% yield).  $R_f = 0.42$  (EtOAc/hexanes 1:10); m. p. = 144–145 °C.  $[\alpha]_D^{23.2} = -21.5$  ( $c = 0.5$ , CHCl<sub>3</sub>). <sup>1</sup>H NMR (400MHz, CDCl<sub>3</sub>):  $\delta = 7.88$  (d,  $J = 8.0$ Hz, 1H, H-Ar), 7.47–7.33 (m, 6H, H-Ar), 6.80 (t,  $J = 8.0$ Hz, 1H, H-Ar), 6.72 (d,  $J = 8.0$ Hz, 1H, H-Ar), 4.76 (dd,  $J = 4.0$ Hz, 16.0Hz, 1H, CH), 4.52 (s, 1H, NH), 2.93–2.76 (m, 2H, CH<sub>2</sub>). <sup>13</sup>C NMR (100MHz, CDCl<sub>3</sub>):  $\delta = 193.4, 151.7, 141.1, 135.6, 129.1, 128.6, 127.8, 126.8, 119.2, 118.6, 116.1, 58.7, 46.59$ . HRMS (ESI)  $m/z$  calcd for C<sub>15</sub>H<sub>13</sub>NONa 246.0889 [M+Na<sup>+</sup>]; found 246.0879. IR (KBr): 3338, 3127, 1658, 1351, 1351, 1330, 1108, 792, 765, 717 cm<sup>-1</sup>. [Daicel chiralpak AD column, eluting with hexane/isopropanol = 80 : 20, 0.3 mL/min, 214 nm; major enantiomer  $t_R$ , 28.4 min, minor enantiomer  $t_R$ , 32.0 min; 98% ee]. Absolute configuration was determined as *R* by comparison of optical rotation to literature values, [lit.,  $[\alpha]_D^{20} = +27.1$  ( $c = 0.42$ , CHCl<sub>3</sub>) for 98% ee of the (*S*)-enantiomer], and the configurations of other products were assigned by analogy.<sup>[2,3]</sup> Analytical data match those reported in the literature.<sup>[2]</sup> CCDC1418014 contains the crystallographic data for **3a** that can be obtained free of charge from the CCDC via [www.ccdc.cam.ac.uk/data\\_request/cif](http://www.ccdc.cam.ac.uk/data_request/cif).

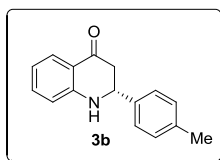

**(R)-2-(p-tolyl)-2,3-dihydroquinolin-4(1H)-one (3b)**<sup>[1,2,8]</sup> Prepared according to general procedure to afford as yellow solid (63% yield).  $R_f = 0.40$  (EtOAc/hexanes 1:10); m. p. = 149–150 °C.  $[\alpha]^{23.0}_D = -24.6$  ( $c = 0.3$ ,  $\text{CHCl}_3$ ).  $^1\text{H NMR}$  (400MHz,  $\text{CDCl}_3$ ):  $\delta = 7.85$  (d,  $J = 8.0\text{Hz}$ , 1H, H-Ar), 7.33–7.32 (m, 3H, H-Ar), 7.20–7.18 (m, 2H, H-Ar), 6.77–6.69 (m, 2H, H-Ar), 4.68 (d,  $J = 16.0\text{Hz}$ , 1H, CH), 4.54 (s, 1H, NH), 2.88–2.70 (m, 2H,  $\text{CH}_2$ ), 2.36 (s, 3H,  $\text{CH}_3$ ).  $^{13}\text{C NMR}$  (100MHz,  $\text{CDCl}_3$ ):  $\delta = 193.6$ , 151.8, 138.4, 138.1, 135.5, 129.7, 127.7, 126.6, 119.1, 118.4, 116.0, 58.3, 46.6, 21.3. HRMS (ESI)  $m/z$  calcd for  $\text{C}_{16}\text{H}_{15}\text{ONNa}$  260.1046 [ $\text{M}+\text{Na}^+$ ]; found 260.1035. IR (KBr): 3374, 2295, 1650, 1508, 1328, 1147, 763, 646, 495  $\text{cm}^{-1}$ . [Daicel chiralpak AD column, eluting with hexane/isopropanol = 80 : 20, 0.3 mL/min, 214 nm; major enantiomer  $t_R$ , 28.0 min, minor enantiomer  $t_R$ , 35.5 min; 98% ee].

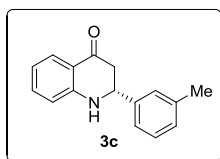

**(R)-2-(m-tolyl)-2,3-dihydroquinolin-4(1H)-one (3c)**<sup>[1]</sup> Prepared according to general procedure to afford as yellow solid (70% yield).  $R_f = 0.41$  (EtOAc/hexanes 1:10); m. p. = 104–105 °C.  $[\alpha]^{23.0}_D = -11.4$  ( $c = 0.3$ ,  $\text{CHCl}_3$ ).  $^1\text{H NMR}$  (400MHz,  $\text{CDCl}_3$ ):  $\delta = 7.76$  (d,  $J = 8.0\text{Hz}$ , 1H, H-Ar), 7.26–7.13 (m, 4H, H-Ar), 7.06 (d,  $J = 8.0\text{Hz}$ , 1H, H-Ar), 6.70–6.62 (m, 2H, H-Ar), 4.60 (dd,  $J = 4.0\text{Hz}$ , 16.0Hz, 1H, CH), 4.52 (s, 1H, NH), 2.78–2.60 (m, 2H,  $\text{CH}_2$ ), 2.28 (s, 3H,  $\text{CH}_3$ ).  $^{13}\text{C NMR}$  (100MHz,  $\text{CDCl}_3$ ):  $\delta = 193.5$ , 151.8, 141.0, 138.8, 135.5, 129.2, 128.9, 127.6, 127.4, 123.8, 119.0, 118.4, 116.0, 58.5, 46.5, 21.6. HRMS (ESI)  $m/z$  calcd for  $\text{C}_{16}\text{H}_{15}\text{ONNa}$  260.1046; found 260.1035 [ $\text{M}+\text{Na}^+$ ]. IR (KBr): 3334, 2289, 1656, 1479, 1330, 1119, 1114, 1002, 865, 763, 701, 620  $\text{cm}^{-1}$ . [Daicel chiralpak AD column, eluting with hexane/isopropanol = 80 : 20, 0.3 mL/min, 214 nm; major enantiomer  $t_R$ , 24.9 min, minor enantiomer  $t_R$ , 29.7 min; 98% ee].

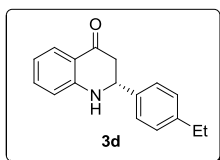

**(R)-2-(4-ethylphenyl)-2,3-dihydroquinolin-4(1H)-one (3d)** Prepared according to general procedure to afford as yellow solid (53% yield).  $R_f = 0.39$  (EtOAc/hexanes 1:10); m. p. = 110–111 °C.  $[\alpha]^{23.0}_D = +15.4$  ( $c = 0.3$ ,  $\text{CHCl}_3$ ).  $^1\text{H NMR}$  (400MHz,  $\text{CDCl}_3$ ):  $\delta = 7.79$  (d,  $J = 8.0\text{Hz}$ , 1H, H-Ar), 7.38–7.22 (m, 5H, H-Ar), 6.70 (t,  $J = 8.0\text{Hz}$ , 1H, H-Ar), 6.62 (d,  $J = 8.0\text{Hz}$ , 1H, H-Ar), 4.64 (dd,  $J = 8.0\text{Hz}$ , 8.0Hz, 1H, CH), 4.53 (s 1H, NH), 2.91–2.72 (m, 2H,  $\text{CH}_2$ ), 2.59 (q, 2H,  $J = 8.0\text{Hz}$ ,  $\text{CH}_2$ ), 1.1 (t,  $J = 8.0\text{Hz}$ , 3H,  $\text{CH}_3$ ).  $^{13}\text{C NMR}$  (100MHz,  $\text{CDCl}_3$ ):  $\delta = 193.7$ , 151.8, 144.8, 138.3, 135.5, 128.6, 127.7, 126.8, 119.1, 118.4, 116.0, 58.3, 46.6, 28.7, 15.7. HRMS (ESI)  $m/z$  calcd for  $\text{C}_{17}\text{H}_{17}\text{NONa}$  274.1202  $[\text{M}+\text{Na}^+]$ ; found 274.1202. IR (KBr): 3301, 2976, 1611, 1511, 1476, 1333, 1259, 1219, 1213, 1120, 1035, 1069, 826, 749, 641  $\text{cm}^{-1}$ . [Daicel chiralpak AD column, eluting with hexane/isopropanol = 80 : 20, 0.3 mL/min, 214 nm; major enantiomer  $t_R$ , 25.4 min, minor enantiomer  $t_R$ , 30.0 min; 96% ee].

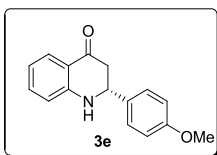

**(R)-2-(4-methoxyphenyl)-2,3-dihydroquinolin-4(1H)-one (3e)**<sup>[1,3]</sup> Prepared according to general procedure to afford as yellow solid (85% yield).  $R_f = 0.36$  (EtOAc/hexanes 1:10); m. p. = 132–133°C.  $[\alpha]^{23.0}_D = -35.7$  ( $c = 0.4$ ,  $\text{CHCl}_3$ ).  $^1\text{H NMR}$  (400MHz,  $\text{CDCl}_3$ ):  $\delta = 7.74$  (d,  $J = 8.0\text{Hz}$ , 1H, H-Ar), 7.26–7.16 (m, 3H, H-Ar), 6.82–6.80 (m, 2H, H-Ar), 6.68–6.61 (m, 2H, H-Ar), 4.56–4.54 (m, 2H, CH, NH), 3.71 (s, 3H,  $\text{OCH}_3$ ), 2.75–2.57 (m, 2H,  $\text{CH}_2$ ).  $^{13}\text{C NMR}$  (100MHz,  $\text{CDCl}_3$ ):  $\delta = 193.69$ , 159.58, 151.77, 135.44, 133.08, 127.88, 127.56, 118.91, 118.28, 116.02, 114.26, 57.86, 55.38, 46.54. HRMS (ESI)  $m/z$  calcd for  $\text{C}_{16}\text{H}_{15}\text{NNaO}_2\text{Na}$  276.0995  $[\text{M}+\text{Na}^+]$ ; found 276.0990. IR (KBr): 3289, 2924, 1649, 1605, 1507, 1475, 1434, 1302, 1248, 1212, 1152, 1036, 910, 825, 753, 635, 442  $\text{cm}^{-1}$ . [Daicel chiralpak AD column, eluting with hexane/isopropanol = 80 : 20, 0.3 mL/min, 214nm; major enantiomer  $t_R$ , 47.7 min,

minor enantiomer  $t_R$ , 55.0 min; 85% ee].

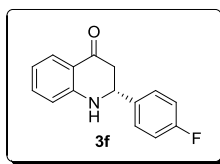

**(R)-2-(4-fluorophenyl)-2,3-dihydroquinolin-4(1H)-one (3f)**<sup>[1,6,7]</sup> Prepared according to general procedure to afford as yellow solid (80% yield).  $R_f = 0.35$  (EtOAc/hexanes 1:10); m. p. = 134–135 °C.  $[\alpha]^{23.0}_D = +9.3$  ( $c = 0.2$ , CHCl<sub>3</sub>). <sup>1</sup>H NMR (400MHz, CDCl<sub>3</sub>):  $\delta = 7.86$  (d,  $J = 8.0$ Hz, 1H, H-Ar), 7.53–7.51 (m, 2H, H-Ar), 7.35–7.33 (m, 3H, H-Ar), 6.83–6.72 (m, 2H, H-Ar), 4.72 (dd,  $J = 4.0$ Hz, 16.0Hz, 1H, CH), 4.42 (s, 1H, NH), 2.86–2.73 (m, 2H, CH<sub>2</sub>). <sup>13</sup>C NMR (100MHz, CDCl<sub>3</sub>):  $\delta = 193.2$ , 162.7 (d,  $J_{F-C} = 246.0$ Hz), 151.5, 136.9, 135.6, 128.5 (d,  $J_{F-C} = 8.0$ Hz), 127.8, 119.2, 118.8, 116.1 (d,  $J_{F-C} = 8.0$ Hz), 115.9, 58.0, 46.7. HRMS (ESI)  $m/z$  calcd for C<sub>15</sub>H<sub>12</sub>FONNa 264.0795; found 264.0781 [M+Na<sup>+</sup>]. IR (KBr): 3299, 2974, 1645, 1506, 1326, 1216, 1118, 1002, 835, 759, 649, 509 cm<sup>-1</sup>. [Daicel chiralpak AD column, eluting with hexane/isopropanol = 80 : 20, 0.3 mL/min, 214 nm; major enantiomer  $t_R$ , 27.9 min, minor enantiomer  $t_R$ , 35.7 min; 99% ee].

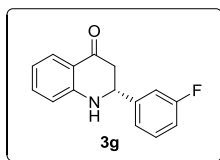

**(R)-2-(3-fluorophenyl)-2,3-dihydroquinolin-4(1H)-one (3g)**<sup>[1,2,8]</sup> Prepared according to general procedure to afford as yellow solid (80% yield).  $R_f = 0.36$  (EtOAc/hexanes 1:10); m. p. = 138–139 °C.  $[\alpha]^{23.0}_D = +5.2$  ( $c = 0.3$ , CHCl<sub>3</sub>). <sup>1</sup>H NMR (400MHz, (CD<sub>3</sub>)<sub>2</sub>SO):  $\delta = 7.62$  (d,  $J = 8.0$ Hz, 1H, H-Ar), 7.44–7.33 (m, 4H, H-Ar), 7.18–7.13 (m, 2H, H-Ar), 6.92 (d,  $J = 8.0$ Hz, 1H, H-Ar), 6.66 (t,  $J = 8.0$ Hz, 1H, H-Ar), 4.81 (d,  $J = 8.0$ Hz, 1H, CH), 2.88–2.69 (m, 2H, CH<sub>2</sub>). <sup>13</sup>C NMR (100MHz, (CD<sub>3</sub>)<sub>2</sub>SO):  $\delta = 192.2$ , 162.2 (d,  $J_{F-C} = 242.0$ Hz), 152.3, 144.7 (d,  $J_{F-C} = 7.0$ Hz), 135.2, 130.6 (d,  $J_{F-C} = 8.0$ Hz), 126.4, 123.0, 117.8, 116.7, 116.3, 114.5 (d,  $J_{F-C} = 21.0$ Hz), 113.7 (d,  $J_{F-C} = 21.0$ Hz), 55.7, 45.0. HRMS (ESI)  $m/z$  calcd for C<sub>15</sub>H<sub>12</sub>FONNa 264.0795 [M+Na<sup>+</sup>]; found 264.0781. IR (KBr): 3332, 2947, 1608, 1479, 1330, 1145,

875, 763, 640  $\text{cm}^{-1}$ . [Daicel chiralpak AD column, eluting with hexane/isopropanol = 80 : 20, 0.3 mL/min, 214 nm; major enantiomer  $t_{\text{R}}$ , 23.9 min, minor enantiomer  $t_{\text{R}}$ , 25.8 min; 84% ee].

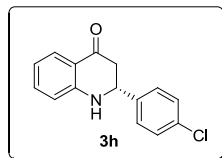

**(R)-2-(4-chlorophenyl)-2,3-dihydroquinolin-4(1H)-one (3h)**<sup>[2]</sup> Prepared according to general procedure to afford as yellow solid (78% yield).  $R_{\text{f}} = 0.33$  (EtOAc/hexanes 1:10); m. p. = 173–174 °C.  $[\alpha]_{\text{D}}^{23.0} = -12.4$  ( $c = 0.4$ ,  $\text{CHCl}_3$ ).  $^1\text{H}$  NMR (400MHz,  $\text{CDCl}_3$ ):  $\delta = 7.79$  (d,  $J = 8.0\text{Hz}$ , 1H, H-Ar), 7.34–7.26 (m, 5H, H-Ar), 6.73 (t,  $J = 8.0\text{Hz}$ , 1H, H-Ar), 6.66 (d,  $J = 8.0\text{Hz}$ , 1H, H-Ar), 4.66 (dd,  $J = 4.0\text{Hz}$ , 16.0Hz, 1H, CH), 4.51 (s, 1H, NH), 2.86–2.71 (m, 2H,  $\text{CH}_2$ ).  $^{13}\text{C}$  NMR (100MHz,  $\text{CDCl}_3$ ):  $\delta = 192.0$ , 150.5, 138.7, 134.7, 133.3, 128.3, 127.1, 126.7, 118.2, 117.8, 115.1, 57.03, 45.6. HRMS (ESI)  $m/z$  calcd for  $\text{C}_{15}\text{H}_{12}\text{NOCINa}$  280.0500 [ $\text{M}+\text{Na}^+$ ]; found 280.0498. IR (KBr): 3305, 2906, 1650, 1481, 1328, 1147, 765, 644, 495  $\text{cm}^{-1}$ . [Daicel chiralpak AD column, eluting with hexane/isopropanol = 80 : 20, 0.3 mL/min, 214 nm; major enantiomer  $t_{\text{R}}$ , 27.7 min, minor enantiomer  $t_{\text{R}}$ , 33.6 min; 82% ee].

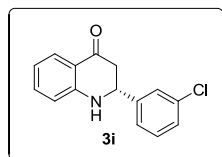

**(R)-2-(3-chlorophenyl)-2,3-dihydroquinolin-4(1H)-one (3i)**<sup>[2]</sup> Prepared according to general procedure to afford as yellow solid (84% yield).  $R_{\text{f}} = 0.33$  (EtOAc/hexanes 1:10); m. p. = 130–131 °C.  $[\alpha]_{\text{D}}^{23.0} = +65.3$  ( $c = 0.3$ ,  $\text{CHCl}_3$ ).  $^1\text{H}$  NMR (400MHz,  $\text{CDCl}_3$ ):  $\delta = 7.85$  (d, 1H, H-Ar), 7.47 (s, 1H, H-Ar), 7.37–7.32 (m, 4H, H-Ar), 6.82–6.73 (m, 2H, H-Ar), 4.71 (dd,  $J = 4.0\text{Hz}$ , 16.0Hz, 1H, CH), 4.62 (s, 1H, NH), 2.85–2.71 (m, 2H,  $\text{CH}_2$ ).  $^{13}\text{C}$  NMR (100MHz,  $\text{CDCl}_3$ ):  $\delta = 193.0$ , 151.5, 143.2, 135.7, 134.9, 130.4, 128.7, 127.7, 126.9, 125.0, 119.1, 118.8, 116.1, 58.1, 46.4. HRMS (ESI)  $m/z$  calcd for  $\text{C}_{15}\text{H}_{12}\text{NOCINa}$  280.0500 [ $\text{M}+\text{Na}^+$ ]; found 280.0498. IR (KBr): 3328, 2937, 1660, 1477, 1330, 1155, 997, 761, 638  $\text{cm}^{-1}$ . [Daicel chiralpak AD column,

eluting with hexane/isopropanol = 80 : 20, 0.3 mL/min, 214 nm; major enantiomer  $t_R$ , 24.1 min, minor enantiomer  $t_R$ , 26.1 min; 87% ee].

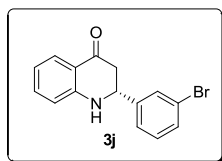

**(R)-2-(3-bromophenyl)-2,3-dihydroquinolin-4(1H)-one (3j)**<sup>[1]</sup> Prepared according to general procedure to afford as yellow solid (72% yield).  $R_f$  = 0.36 (EtOAc/hexanes 1:10); m. p. = 118–119 °C.  $[\alpha]^{23.0}_D = +12.0$  ( $c = 0.3$ ,  $\text{CHCl}_3$ ).  $^1\text{H NMR}$  (400MHz,  $\text{CDCl}_3$ ):  $\delta = 7.86$  (dd,  $J = 4.0\text{Hz}$ ,  $16.0\text{Hz}$ , 1H, H-Ar), 7.64 (s, 1H, H-Ar), 7.49–7.46 (m, 1H, H-Ar), 7.38–7.33 (m, 2H, H-Ar), 7.28–7.24 (m, 1H, H-Ar), 6.83–6.73 (m, 2H, H-Ar), 4.71 (dd,  $J = 4.0\text{Hz}$ ,  $16.0\text{Hz}$ , 1H, CH), 4.56 (s, 1H, NH), 2.87–2.72 (m, 2H,  $\text{CH}_2$ ).  $^{13}\text{C NMR}$  (100MHz,  $\text{CDCl}_3$ ):  $\delta = 193.0$ , 151.5, 143.4, 135.7, 131.6, 130.6, 129.8, 127.6, 125.4, 123.0, 119.0, 118.7, 116.2, 58.0, 46.3. HRMS (ESI)  $m/z$  calcd for  $\text{C}_{15}\text{H}_{12}\text{ONBrNa}$  323.9994  $[\text{M}+\text{Na}^+]$ ; found 323.9998. IR (KBr): 3328, 2938, 1658, 1475, 1330, 1285, 1114, 763, 642  $\text{cm}^{-1}$ . [Daicel chiralpak AD column, eluting with hexane/isopropanol = 80 : 20, 0.3 mL/min, 214 nm; major enantiomer  $t_R$ , 23.1 min, minor enantiomer  $t_R$ , 26.1 min; 83 % ee].

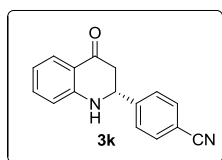

**(R)-4-(4-oxo-1,2,3,4-tetrahydroquinolin-2-yl)benzonitrile (3k)** Prepared according to general procedure to afford as yellow solid (70% yield).  $R_f$  = 0.35 (EtOAc/hexanes 1:10); m. p. = 145–146 °C.  $[\alpha]^{23.0}_D = +19.5$  ( $c = 0.4$ ,  $\text{CHCl}_3$ ).  $^1\text{H NMR}$  (400MHz,  $(\text{CD}_3)_2\text{SO}$ ):  $\delta = 7.86$  (d,  $J = 8.0\text{Hz}$ , 2H, H-Ar), 7.69 (d,  $J = 8.0\text{Hz}$ , 2H, H-Ar), 7.36–7.24 (m, 2H, H-Ar), 6.90 (d,  $J = 8.0\text{Hz}$ , 1H, H-Ar), 6.66 (t,  $J = 8.0\text{Hz}$ , 1H, H-Ar), 4.89 (dd,  $J = 4.0\text{Hz}$ ,  $16.0\text{ Hz}$ , 1H, CH), 2.86–2.71 (m, 2H,  $\text{CH}_2$ ).  $^{13}\text{C NMR}$  (100MHz,  $(\text{CD}_3)_2\text{SO}$ ):  $\delta = 191.9$ , 152.2, 147.4, 135.3, 132.6, 127.9, 126.4, 118.8, 117.8, 116.9, 116.3, 110.5, 55.8, 44.7. HRMS (ESI)  $m/z$  calcd for  $\text{C}_{16}\text{H}_{12}\text{N}_2\text{ONa}$  271.0842  $[\text{M}+\text{Na}^+]$ ; found 271.0853. IR (KBr): 3338, 2956, 1693, 1607, 1472, 1364, 1305, 1226, 1150,



1116, 962, 765, 656  $\text{cm}^{-1}$ . [Daicel chiralpak AD column, eluting with hexane/isopropanol = 80 : 20, 0.3 mL/min, 254 nm; major enantiomer  $t_R$ , 39.5 min, minor enantiomer  $t_R$ , 45.9 min; 96% ee].

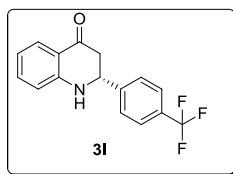

**(R)-2-(4-(trifluoromethyl)phenyl)-2,3-dihydroquinolin-4(1H)-one (3l)**<sup>[7]</sup> Prepared according to general procedure to afford as yellow solid (75% yield).  $R_f$  = 0.40 (EtOAc/hexanes 1:10); m. p. = 160–161 °C.  $[\alpha]^{23.0}_D = -29.5$  ( $c = 0.45$ ,  $\text{CHCl}_3$ ).  $^1\text{H}$  NMR (400MHz,  $\text{CDCl}_3$ ):  $\delta = 7.86$  (d,  $J = 4.0\text{Hz}$ , 1H), 7.67–7.57 (m, 4H, H-Ar), 7.39–7.34 (m, 1H, H-Ar), 7.26 (s, 1H, H-Ar), 4.82 (dd,  $J = 4.0\text{Hz}$ , 12.0Hz, 1H, CH), 4.62 (s, 1H, NH), 2.87–2.74 (m, 2H,  $\text{CH}_2$ ).  $^{13}\text{C}$  NMR (100MHz,  $\text{CDCl}_3$ ):  $\delta = 191.67$ , 150.39, 144.15, 134.74, 129.80 (q,  $J_{F-C} = 32.0\text{Hz}$ ), 126.72, 126.14, 125.18, 125.14, 125.10, 125.07, 123.03 (q,  $J_{F-C} = 271.0\text{Hz}$ ), 118.19, 117.97, 57.19, 45.37. HRMS (ESI)  $m/z$  calcd for  $\text{C}_{16}\text{H}_{12}\text{F}_3\text{NONa}$  314.0763 [ $\text{M}+\text{Na}^+$ ]; found 314.0771. IR (KBr): 3368, 2971, 1657, 1612, 1508, 1478, 1328, 1155, 1278, 1120, 1062, 766, 690, 639, 574  $\text{cm}^{-1}$ . [Daicel chiralpak AD column, eluting with hexane/isopropanol = 80 : 20, 0.3 mL/min, 214nm; major enantiomer  $t_R$ , 30.1 min, minor enantiomer  $t_R$ , 34.7 min; 86% ee].

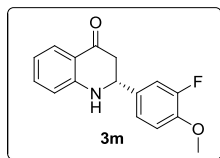

**(R)-2-(3-fluoro-4-methoxyphenyl)-2,3-dihydroquinolin-4(1H)-one (3m)** Prepared according to general procedure to afford as yellow solid (75% yield).  $R_f$  = 0.39 (EtOAc/hexanes 1:10); m. p. = 123–124 °C.  $[\alpha]^{23.0}_D = -10.7$  ( $c = 0.3$ ,  $\text{CHCl}_3$ ).  $^1\text{H}$  NMR (400MHz,  $\text{CDCl}_3$ ):  $\delta = 7.85$  (d,  $J = 4.0\text{Hz}$ , 1H), 7.36–7.33 (m, 1H, H-Ar), 7.19–7.13 (m, 2H, H-Ar), 6.95 (t,  $J = 8.0\text{Hz}$ , 1H, H-Ar), 6.81–6.72 (m, 2H, H-Ar),

4.66 (dd,  $J = 4.0\text{Hz}$ ,  $12.0\text{ Hz}$ , 1H, CH), 4.57 (s, 1H, NH), 3.89 (s, 3H, OCH<sub>3</sub>), 2.84–2.70 (m, 2H, CH<sub>2</sub>). <sup>13</sup>C NMR (100MHz, CDCl<sub>3</sub>):  $\delta = 193.2$ ,  $152.4$  (d,  $J_{F-C} = 225.0\text{Hz}$ ),  $151.5$ ,  $147.7$  (d,  $J_{F-C} = 10.0\text{Hz}$ ),  $135.6$ ,  $134.1$  (d,  $J_{F-C} = 5.0\text{Hz}$ ),  $127.6$ ,  $122.6$  (d,  $J_{F-C} = 3.0\text{Hz}$ ),  $119.1$ ,  $118.7$ ,  $116.1$ ,  $114.5$  (d,  $J_{F-C} = 19.0\text{Hz}$ ),  $113.6$ ,  $57.7$ ,  $56.4$ ,  $46.6$ . HRMS (ESI)  $m/z$  calcd for C<sub>16</sub>H<sub>14</sub>O<sub>2</sub>NFNa 294.0901 [M+Na<sup>+</sup>]; found 294.0884. IR (KBr): 3322, 2836, 1656, 1612, 1504, 1278, 1130, 767, 630, 576 cm<sup>-1</sup>. [Daicel chiralpak AD column, eluting with hexane/isopropanol = 80 : 20, 0.3 mL/min, 214 nm; major enantiomer  $t_R$ , 43.1 min, minor enantiomer  $t_R$ , 48.7 min; 80% ee].

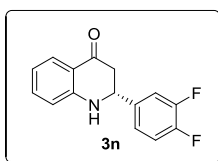

**(R)-2-(3,4-difluorophenyl)-2,3-dihydroquinolin-4(1H)-one (3n)** Prepared according to general procedure to afford as yellow solid (82% yield).  $R_f = 0.34$  (EtOAc/hexanes 1:10); m. p. = 141–142 °C.  $[\alpha]^{23.0}_D = +34.5$  ( $c = 0.3$ , CHCl<sub>3</sub>). <sup>1</sup>H NMR (400MHz, CDCl<sub>3</sub>):  $\delta = 7.82$  (d,  $J = 8.0\text{Hz}$ , 1H, H-Ar),  $7.37$ – $7.27$  (m, 2H, H-Ar),  $7.20$ – $7.14$  (m, 2H, H-Ar),  $6.81$ – $6.75$  (m, 2H, H-Ar),  $4.71$ – $4.67$  (m, 2H, CH, NH),  $2.80$ – $2.68$  (m, 2H, CH<sub>2</sub>). <sup>13</sup>C NMR (100MHz, CDCl<sub>3</sub>):  $\delta = 192.8$ ,  $150.5$  (dd,  $J_{F-C} = 248.0\text{Hz}$ ,  $13.0\text{Hz}$ ),  $151.4$ ,  $150.1$  (dd,  $J_{F-C} = 248.0\text{Hz}$ ,  $13.0\text{Hz}$ ),  $138.2$ ,  $135.7$ ,  $127.5$ ,  $122.7$ ,  $118.9$ ,  $118.8$ ,  $117.8$  (d,  $J_{F-C} = 18.0\text{Hz}$ ),  $116.2$ ,  $115.7$  (d,  $J_{F-C} = 18.0\text{Hz}$ ),  $57.5$ ,  $46.4$ . HRMS (ESI)  $m/z$  calcd for C<sub>15</sub>H<sub>11</sub>ONF<sub>2</sub>Na 282.0701 [M+Na<sup>+</sup>]; found 282.0715. IR (KBr): 3316, 2923, 1656, 1608, 1403, 1151, 763, 667 cm<sup>-1</sup>. [Daicel chiralpak AD column, eluting with hexane/isopropanol = 80 : 20, 0.3 mL/min, 214 nm; major enantiomer  $t_R$ , 24.5 min, minor enantiomer  $t_R$ , 27.1 min; 92% ee]. CCDC1418015 contains the crystallographic data for **3l** that can be obtained free of charge from the CCDC via [www.ccdc.cam.ac.uk/data\\_request/cif](http://www.ccdc.cam.ac.uk/data_request/cif).

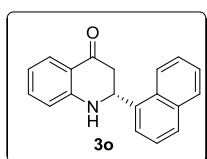

**(R)-2-(naphthalen-1-yl)-2,3-dihydroquinolin-4(1H)-one (3o)**<sup>[7]</sup> Prepared according to general procedure to afford as yellow solid (67% yield).  $R_f = 0.45$  (EtOAc/hexanes 1:10); m. p. = 166–167 °C.  $[\alpha]^{23.0}_D = -31.6$  ( $c = 0.5$ ,  $\text{CHCl}_3$ ).  $^1\text{H NMR}$  (400MHz,  $\text{CDCl}_3$ ):  $\delta = 7.90\text{--}7.83$  (m, 5H, H-Ar), 7.57–7.50 (m, 3H, H-Ar), 7.34–7.38 (m, 1H, H-Ar), 6.82–6.74 (m, 2H, H-Ar), 4.88 (dd,  $J = 4.0\text{Hz}$ , 16.0Hz, 1H, CH), 4.64 (s, 1H, NH), 2.99–2.80 (m, 2H,  $\text{CH}_2$ ).  $^{13}\text{C NMR}$  (100MHz,  $\text{CDCl}_3$ ):  $\delta$  193.4, 151.7, 138.5, 135.6, 133.4, 133.4, 129.0, 128.0, 127.9, 127.7, 126.7, 126.5, 125.7, 124.4, 119.2, 118.6, 116.1, 58.7, 46.5. HRMS (ESI)  $m/z$  calcd for  $\text{C}_{19}\text{H}_{15}\text{ONNa}$  296.1046  $[\text{M}+\text{Na}^+]$ ; found 296.1058. IR (KBr): 3320, 3054, 2978, 1656, 1605, 1508, 1326, 1149, 750, 576, 442  $\text{cm}^{-1}$ . [Daicel chiralpak AD column, eluting with hexane/isopropanol = 80 : 20, 0.3 mL/min, 214 nm; major enantiomer  $t_R$ , 38.6 min , minor enantiomer  $t_R$ , 42.0 min; 99% ee].

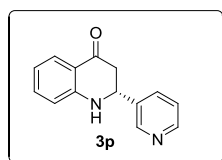

**(R)-2-(pyridin-3-yl)-2,3-dihydroquinolin-4(1H)-one (3p)**<sup>[7]</sup> Prepared according to general procedure to afford as yellow solid (78% yield).  $R_f = 0.21$  (EtOAc/hexanes 1:10); m. p. = 152–153 °C.  $[\alpha]^{23.0}_D = +16.0$  ( $c = 0.4$ ,  $\text{CHCl}_3$ ).  $^1\text{H NMR}$  (400MHz,  $\text{CDCl}_3$ ):  $\delta = 8.64$  (s, 1H, H-Ar), 8.57–8.55 (m, 1H, H-Ar), 7.85–7.80 (m, 2H, H-Ar), 7.37–7.29 (m, 2H, H-Ar), 6.82–6.77 (m, 2H, H-Ar), 4.95 (s, 1H, NH), 4.76 (dd,  $J = 8.0\text{ Hz}$ , 8.0 Hz, 1H, CH), 2.88–2.71 (m, 2H,  $\text{CH}_2$ ).  $^{13}\text{C NMR}$  (100MHz,  $\text{CDCl}_3$ ):  $\delta = 192.6$ , 151.5, 149.9, 148.5, 136.6, 135.7, 134.4, 127.6, 123.9, 119.0, 118.8, 116.2, 56.1, 46.0. HRMS (ESI)  $m/z$  calcd for  $\text{C}_{14}\text{H}_{12}\text{N}_2\text{ONa}$  247.0836  $[\text{M}+\text{Na}^+]$ ; found 247.0836. IR (KBr): 3218, 2929, 1666, 1475, 1303, 1145, 1024, 771, 710  $\text{cm}^{-1}$ . [Daicel chiralpak AD column, eluting with hexane/isopropanol = 80 : 20, 0.3 mL/min, 254 nm; major enantiomer  $t_R$ , 27.9 min, minor enantiomer  $t_R$ , 32.7 min; 98% ee].

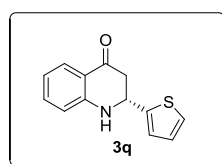

**(R)-2-(thiophen-2-yl)-2,3-dihydroquinolin-4(1H)-one (3q)**<sup>[1,3]</sup> Prepared according to general procedure to afford as yellow solid (71% yield).  $R_f = 0.30$  (EtOAc/hexanes 1:10); m. p. = 140–141°C.  $[\alpha]^{23.0}_D = -30.7$  ( $c = 0.4$ ,  $\text{CHCl}_3$ ).  $^1\text{H NMR}$  (400MHz,  $\text{CDCl}_3$ ):  $\delta = 7.76$  (d,  $J = 4.0\text{Hz}$ , 1H), 7.26–7.17 (m, 2H, H-Ar), 6.96–6.87 (m, 2H, H-Ar), 6.72–6.63 (m, 2H, H-Ar), 4.92 (dd,  $J = 4.0\text{Hz}$ , 12.0 Hz, 1H,CH), 4.71 (s, 1H, NH), 2.82–2.79 (m, 2H,  $\text{CH}_2$ ).  $^{13}\text{C NMR}$  (100MHz,  $\text{CDCl}_3$ ) :  $\delta = 192.80$ , 150.94, 144.55, 135.56, 127.54, 126.93, 125.18, 125.07, 119.21, 118.77, 116.11, 53.72, 47.04. HRMS (ESI)  $m/z$  calcd for  $\text{C}_{13}\text{H}_{11}\text{NOSNa}$  252.0454 [ $\text{M}+\text{Na}^+$ ]; found 252.0462. IR (KBr): 3320, 2919, 1656, 1478, 1335, 1144, 1015, 778, 710, 678  $\text{cm}^{-1}$ . [Daicel chiralpak AD column, eluting with hexane/isopropanol = 80 : 20, 0.4 mL/min, 214 nm; major enantiomer  $t_R$ , 24.3 min, minor enantiomer  $t_R$ , 27.3 min; 80% ee].

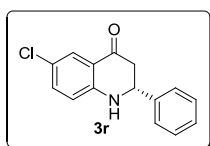

**(R)-6-chloro-2-phenyl-2,3-dihydroquinolin-4(1H)-one (3r)** Prepared according to general procedure to afford as yellow solid (67% yield).  $R_f = 0.42$  (EtOAc/hexanes 1:10); m. p. = 162–163 °C.  $[\alpha]^{23.0}_D = -29.5$  ( $c = 0.50$ ,  $\text{CHCl}_3$ ).  $^1\text{H NMR}$  (400 MHz,  $\text{CDCl}_3$ ):  $\delta = 7.77$  (d,  $J = 4.0\text{Hz}$ , 1H), 7.37–7.29 (m, 5H, H-Ar), 7.22–7.19 (m, 1H, H-Ar), 4.67 (dd,  $J = 4.0\text{Hz}$ , 12.0Hz, 1H,CH), 4.48 (s, 1H, NH), 2.84–2.68 (m, 2H,  $\text{CH}_2$ ).  $^{13}\text{C NMR}$  (100MHz,  $\text{CDCl}_3$ ) :  $\delta = 192.28$ , 192.28, 150.03, 140.66, 135.43, 129.22, 128.80, 127.02, 126.74, 123.95, 119.83, 117.62, 58.54, 46.18. HRMS (ESI)  $m/z$  calcd for  $\text{C}_{15}\text{H}_{12}\text{ONClNa}$  280.0500 [ $\text{M}+\text{Na}^+$ ]; found 280.0508. IR (KBr): 3439, 3338, 2923, 1657, 1615, 1497, 1402, 1198, 855, 761, 701, 494  $\text{cm}^{-1}$ . [Daicel chiralpak AD column, eluting with hexane/isopropanol = 80 : 20, 0.3 mL/min, 214 nm; major enantiomer  $t_R$ , 26.5 min, minor enantiomer  $t_R$ , 30.3 min; 89% ee].

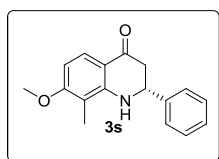

**(R)-7-methoxy-6-methyl-2-phenyl-2,3-dihydroquinolin-4(1H)-one (3s)** Prepared

according to general procedure to afford as yellow solid (62% yield).  $R_f = 0.41$  (EtOAc/hexanes 1:10); m.p. = 132–133 °C.  $[\alpha]^{23.0}_D = -40.7$  ( $c = 0.5$ ,  $\text{CHCl}_3$ ).  $^1\text{H}$  NMR (400 MHz,  $\text{CDCl}_3$ ):  $\delta = 7.77$  (d,  $J = 4.0$  Hz, 1H, H-Ar), 7.43–7.41 (m, 2H, H-Ar), 7.37–7.30 (m, 3H, H-Ar), 6.39 (d,  $J = 4.0$  Hz, 1H, H-Ar), 4.66 (dd,  $J = 4.0$  Hz, 12.0 Hz, 1H, CH), 4.33 (s, 1H, NH), 3.81 (s, 3H,  $\text{OCH}_3$ ), 2.83–2.65 (m, 2H,  $\text{CH}_2$ ), 1.94 (s, 3H,  $\text{CH}_3$ ).  $^{13}\text{C}$  NMR (100 MHz,  $\text{CDCl}_3$ ):  $\delta = 192.80, 162.45, 151.03, 141.58, 129.16, 128.56, 127.21, 126.82, 113.87, 108.81, 102.35, 77.48, 77.16, 76.84, 58.58, 55.89, 46.22, 8.66$ . HRMS (ESI)  $m/z$  calcd for  $\text{C}_{17}\text{H}_{17}\text{O}_2\text{NNa}$  290.1151  $[\text{M}+\text{Na}^+]$ ; found 290.1160. IR (KBr): 3340, 3073, 3011, 1655, 1601, 1461, 1265, 1096, 1024, 758, 695, 564, 487  $\text{cm}^{-1}$ . [Daicel chiralpak AD column, eluting with hexane/isopropanol = 80 : 20, 0.3 mL/min, 214 nm; major enantiomer  $t_R$ , 29.6 min, minor enantiomer  $t_R$ , 35.2 min; 84% ee].

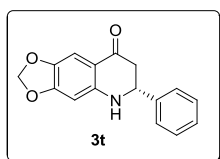

**(R)-6-phenyl-6,7-dihydro-[1,3]dioxolo[4,5-g]quinolin-8(5H)-one (3t)** Prepared according to general procedure to afford as yellow solid (55% yield).  $R_f = 0.29$  (EtOAc/hexanes 1:10); m. p. = 241–242 °C.  $[\alpha]^{23.0}_D = +20.4$  ( $c = 0.5$ ,  $\text{CHCl}_3$ ).  $^1\text{H}$  NMR (400 MHz,  $\text{CDCl}_3$ ):  $\delta = 7.49$ –7.33 (m, 6H, H-Ar), 7.29 (s, 1H, H-Ar), 6.18 (s, 1H, H-N), 5.94 (dd,  $J = 2.5$  Hz, 5.5 Hz, 2H,  $\text{OCH}_2\text{O}$ ), 4.70 (dd,  $J = 4.0$  Hz, 16.0 Hz, 1H, CH), 2.86–2.69 (m, 2H,  $\text{CH}_2$ ).  $^{13}\text{C}$  NMR (100 MHz,  $\text{CDCl}_3$ )  $\delta = 191.5, 154.4, 150.1, 141.7, 141.1, 129.1, 128.6, 126.8, 112.8, 105.1, 101.6, 95.9, 59.2, 46.0$ . HRMS (ESI)  $m/z$  calcd for  $\text{C}_{16}\text{H}_{11}\text{NO}_3\text{Na}$  290.0787  $[\text{M}+\text{Na}^+]$ ; found 290.0787. IR (KBr): 3276, 2919, 1608, 1475, 1243, 1364, 1305, 1226, 1150, 1116, 1069, 1035, 962, 889, 855, 819, 694, 654  $\text{cm}^{-1}$ . [Daicel chiralpak AD column, eluting with hexane/isopropanol = 80 : 20, 0.3 mL/min, 214 nm; major enantiomer  $t_R$ , 38.0 min, minor enantiomer  $t_R$ , 46.5 min; 99% ee].

### 3. Referncnes:

- (1) Saito, K.; Moriya, Y.; Akiyama, T. *Org. Lett.* **2015**, *17*, 3202.
- (2) Kanagaraj, K.; Pichumani, K. *J. Org. Chem.* **2013**, *78*, 744.
- (3) Lei, B.-L.; Ding, C.-H.; Yang, X.-F.; Wao, X.-L.; Hou, X.-L. *J. Am. Chem. Soc.* **2009**, *131*, 18250.
- (4) Liu, X.-Q.; Lu, Y.-X.; *Org. Lett.* **2010**, *12*, 5592.
- (5) Cheng, S.; Zhao, L.; Yu, S. *Adv. Synth. Catal.* **2014**, *356*, 982.
- (6) Chandrasekhar, K.; Vijeender, K.; Sridhar, C. *Tetrahedron lett*, **2007**, *48*, 4935.
- (7) Sharma, S.; Thakur, V.; Budhiraja, A.; Mohinder, P.; *Letters in Drug Design & Discovery*, **2013**, *10*, 327.
- (8) Bhattacharya, R.; Kundu, P.; Maiti, G. *Synth. Commun.* **2010**, *40*, 476.
- (9) Chelghouma, M.; Bahnous, M.; Bouraiou, A.; Bouacida, S. ;Belfaitaha, A. *Tetrahedron lett.*, **2012**, *53*, 4059.
- (10) Zheng, H.; Liu, Q.; Wen, S.; Yang, H.; Luo, Y. *Tetrahedron: Asymmetry*, **2013**, *24*, 875.

## 4. NMR Spectra

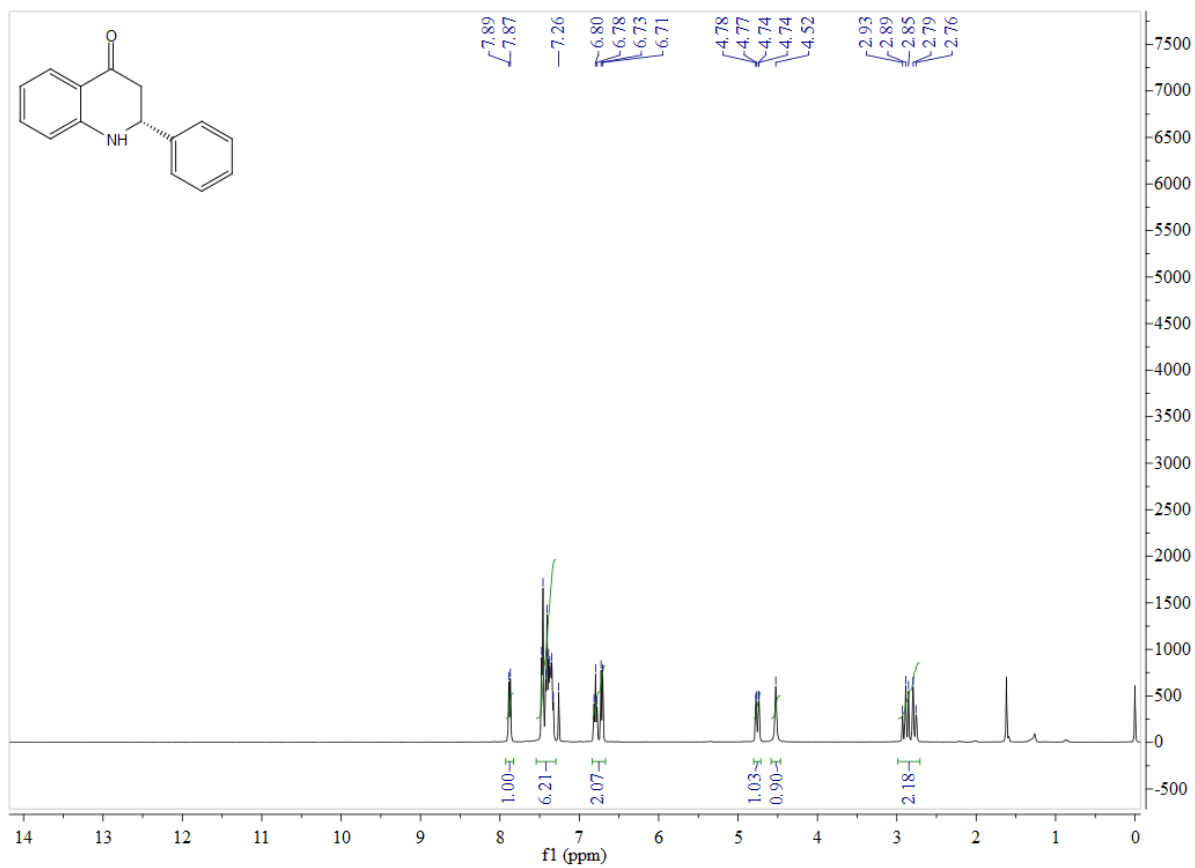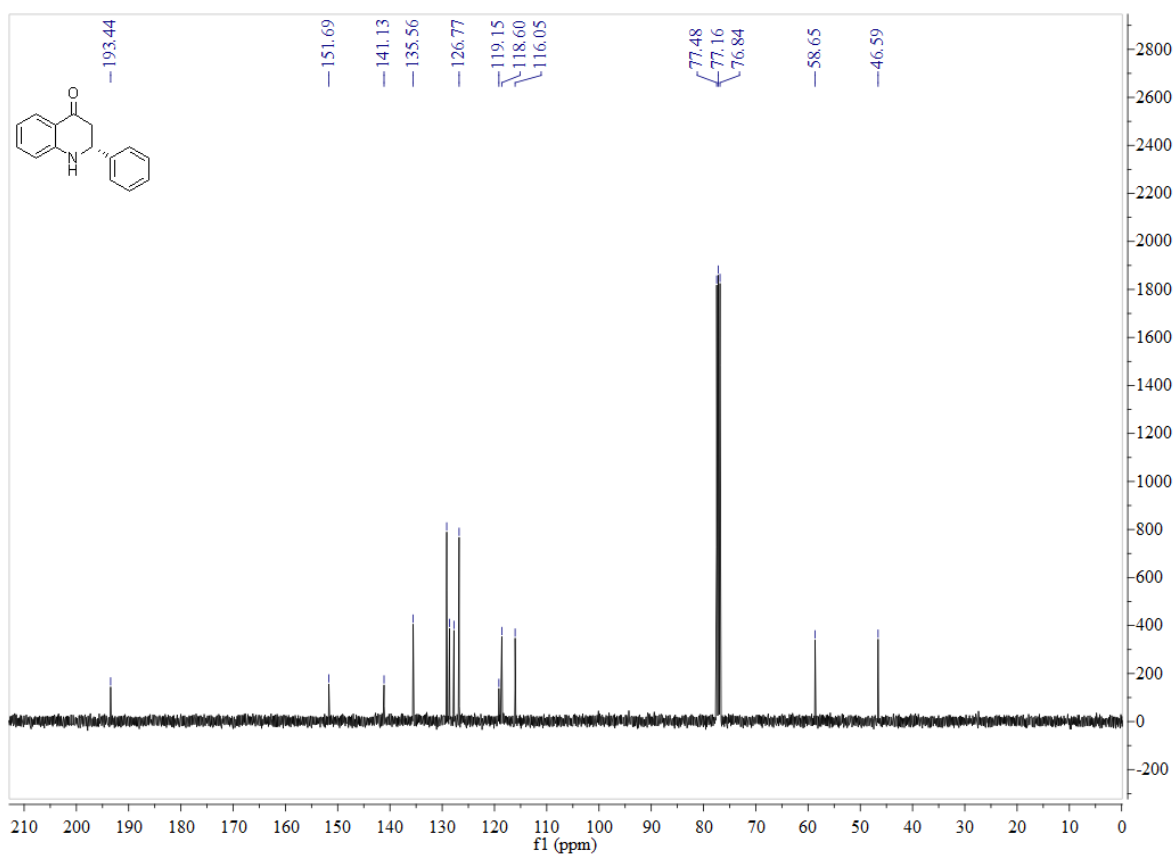

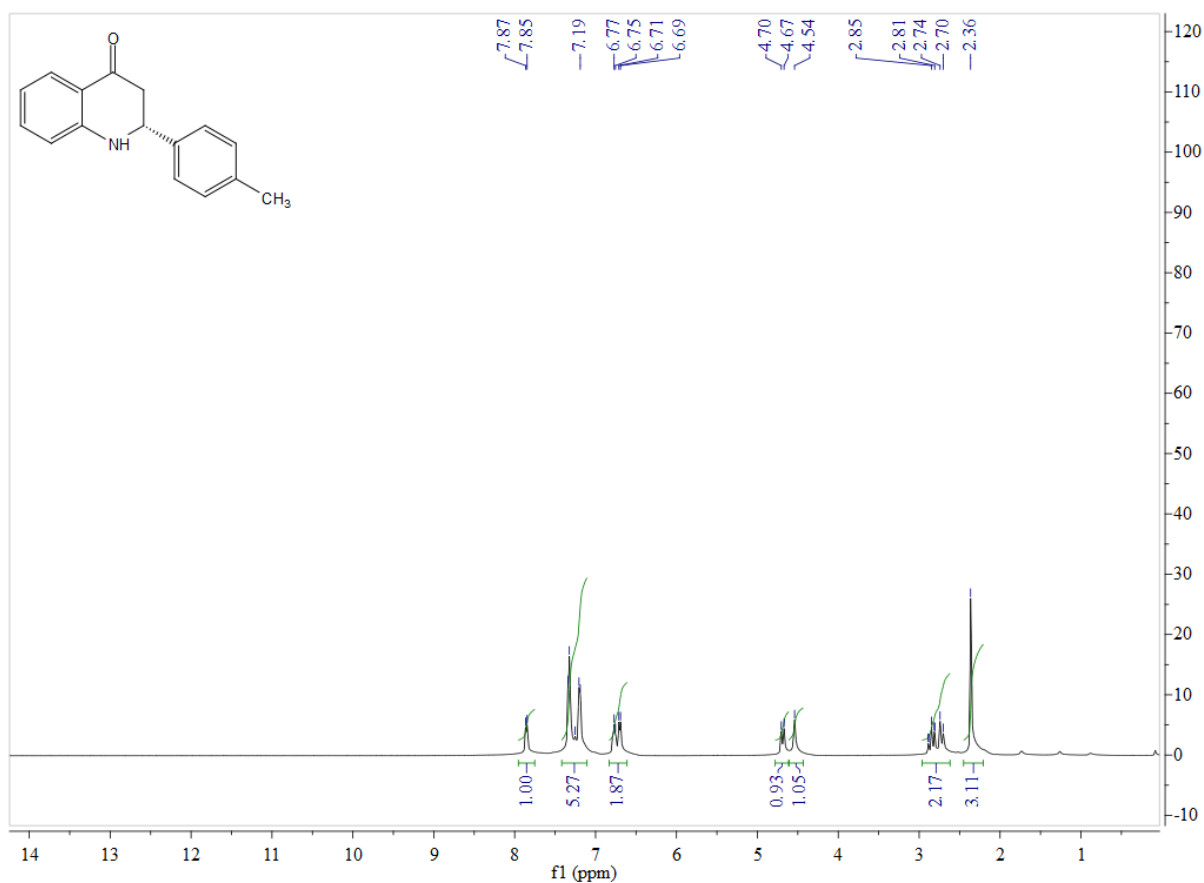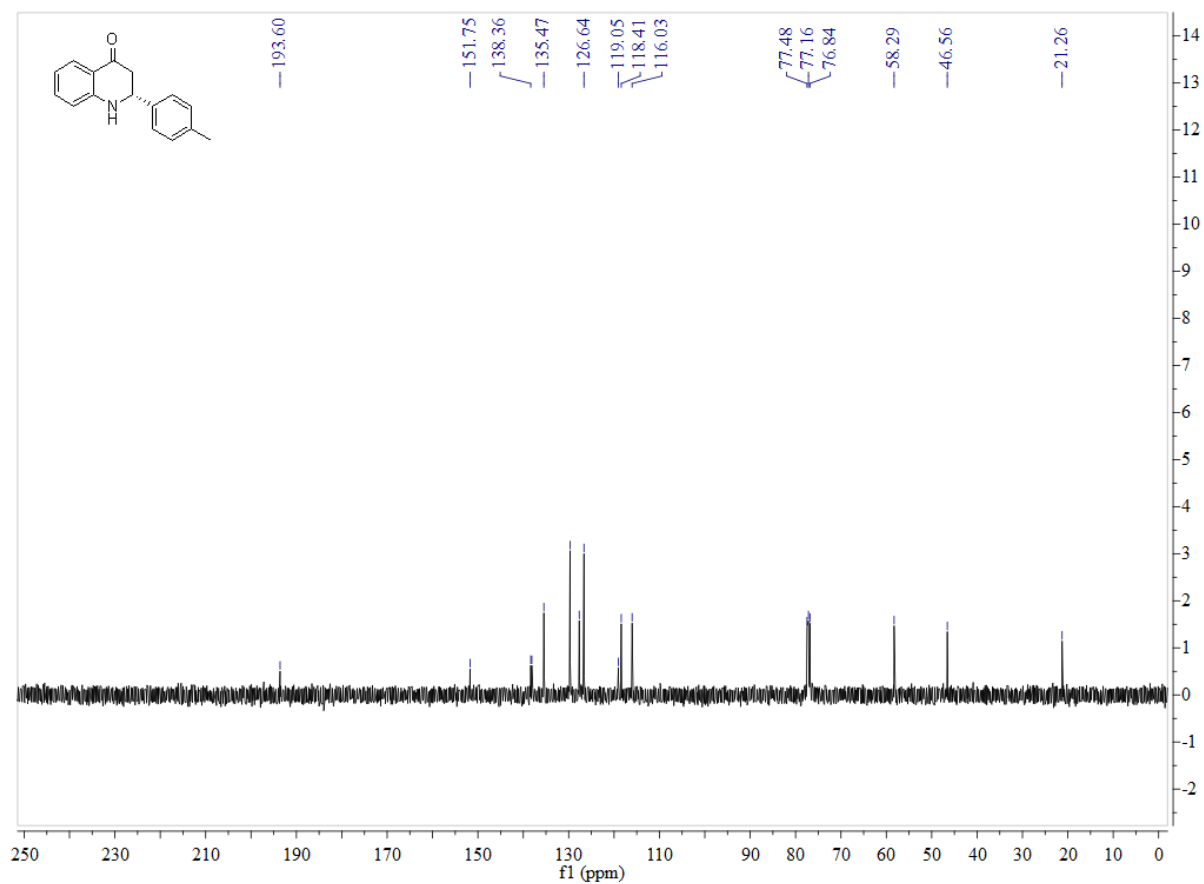



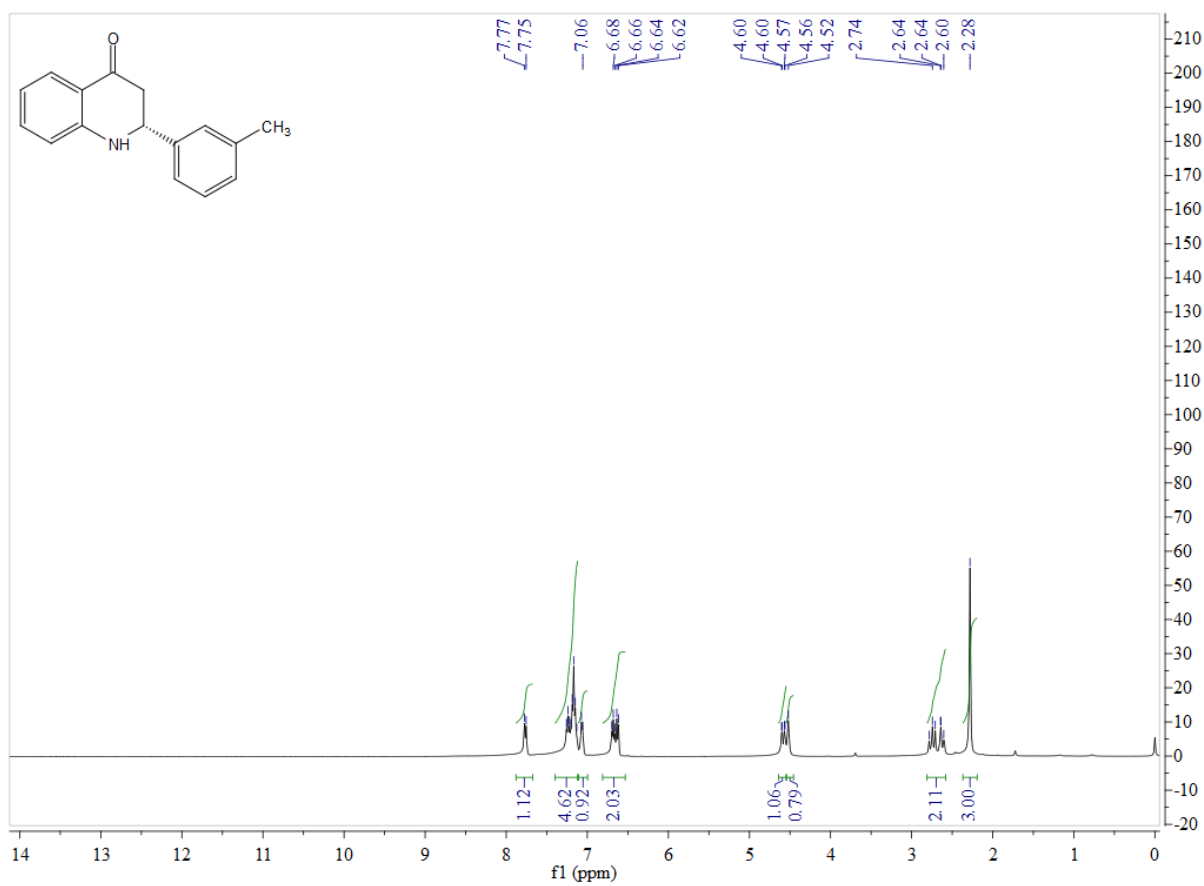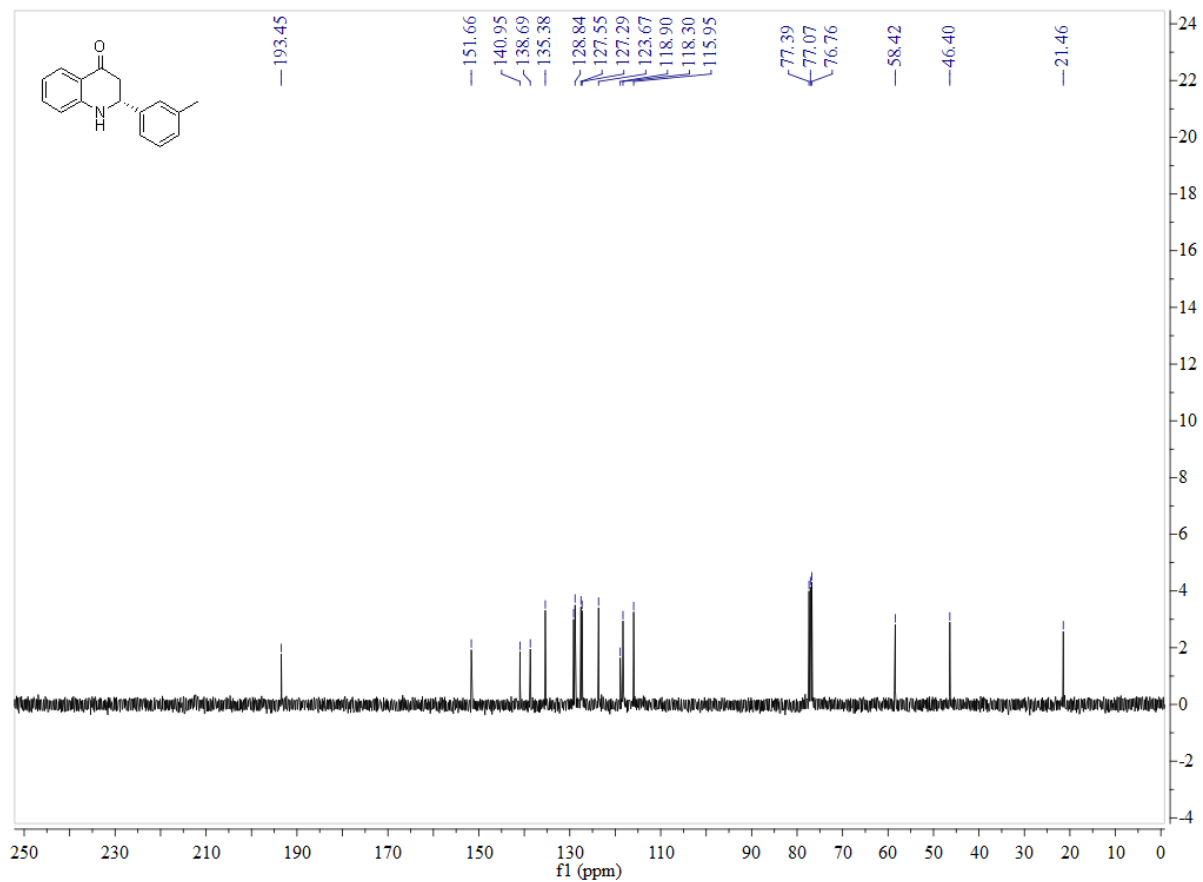

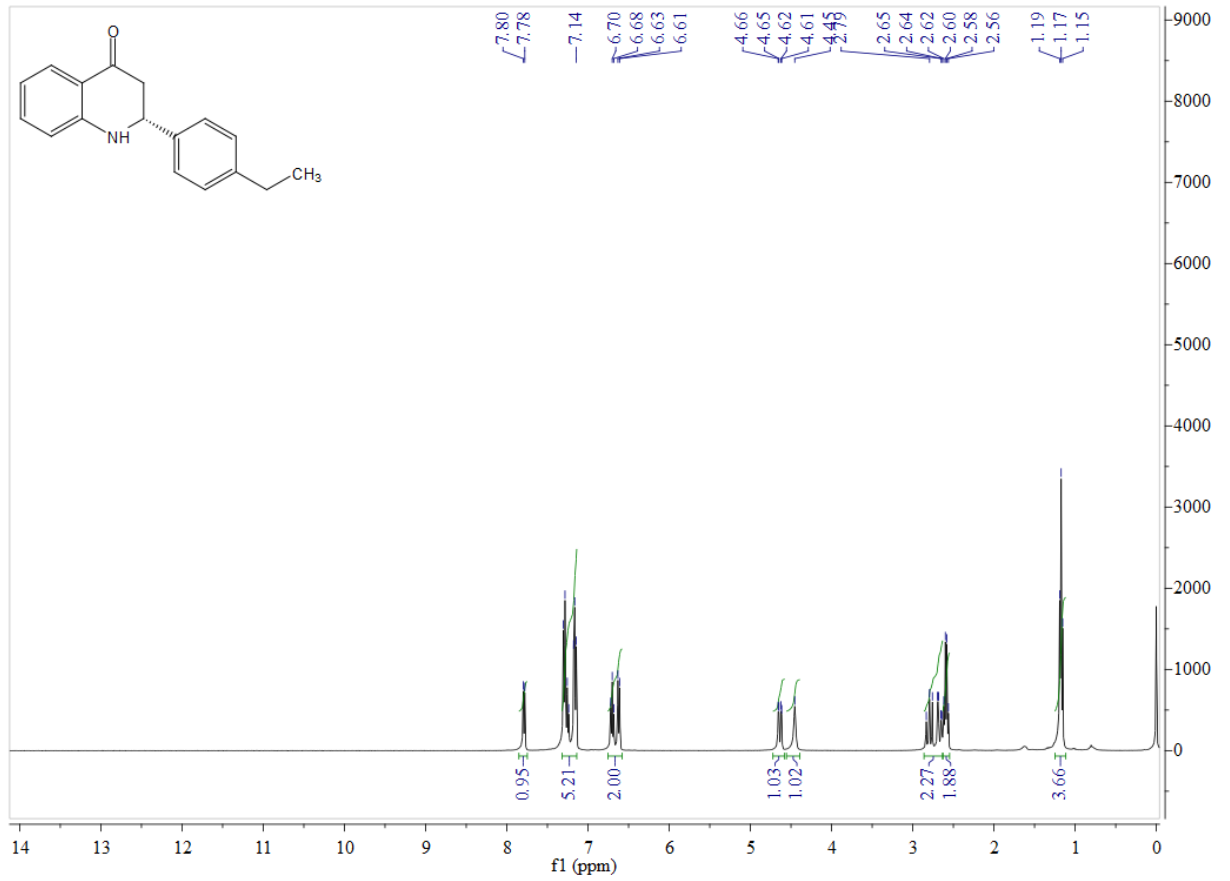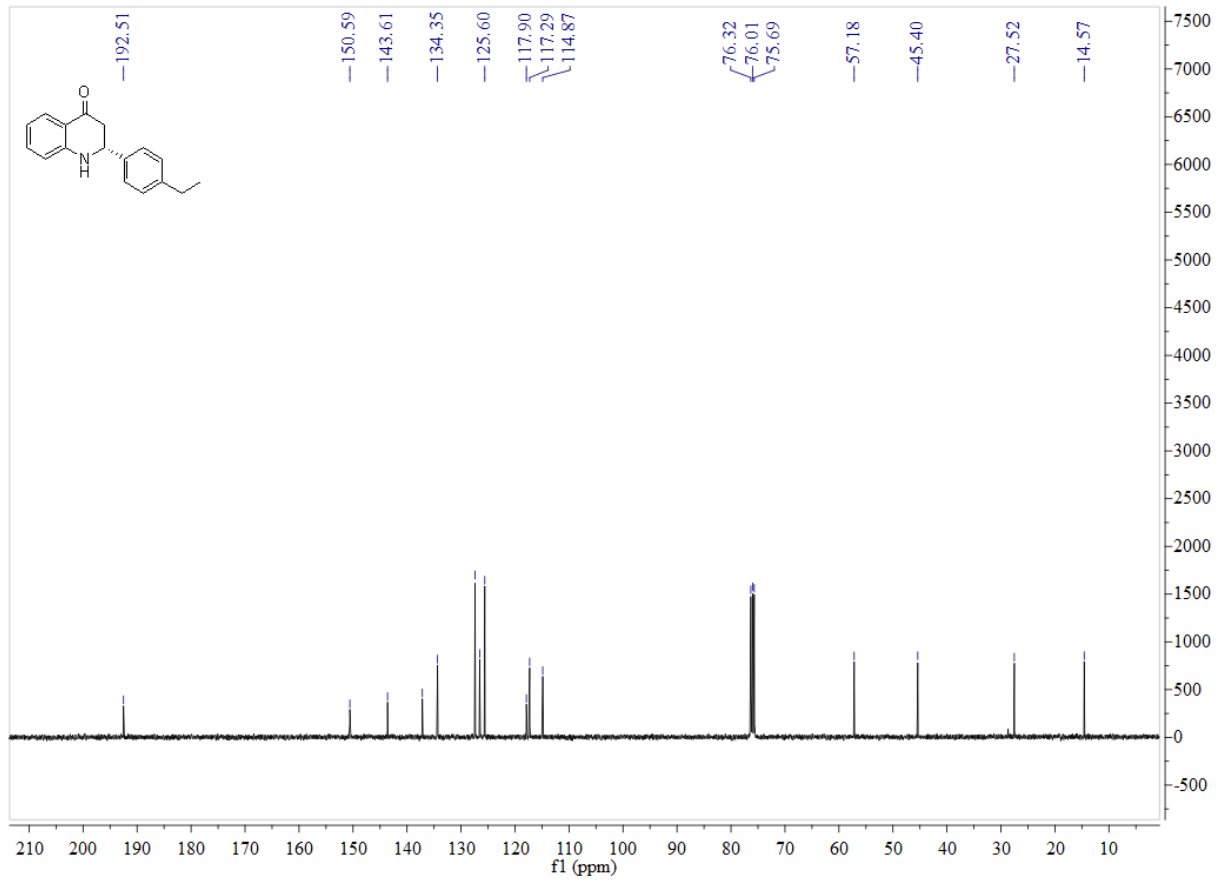

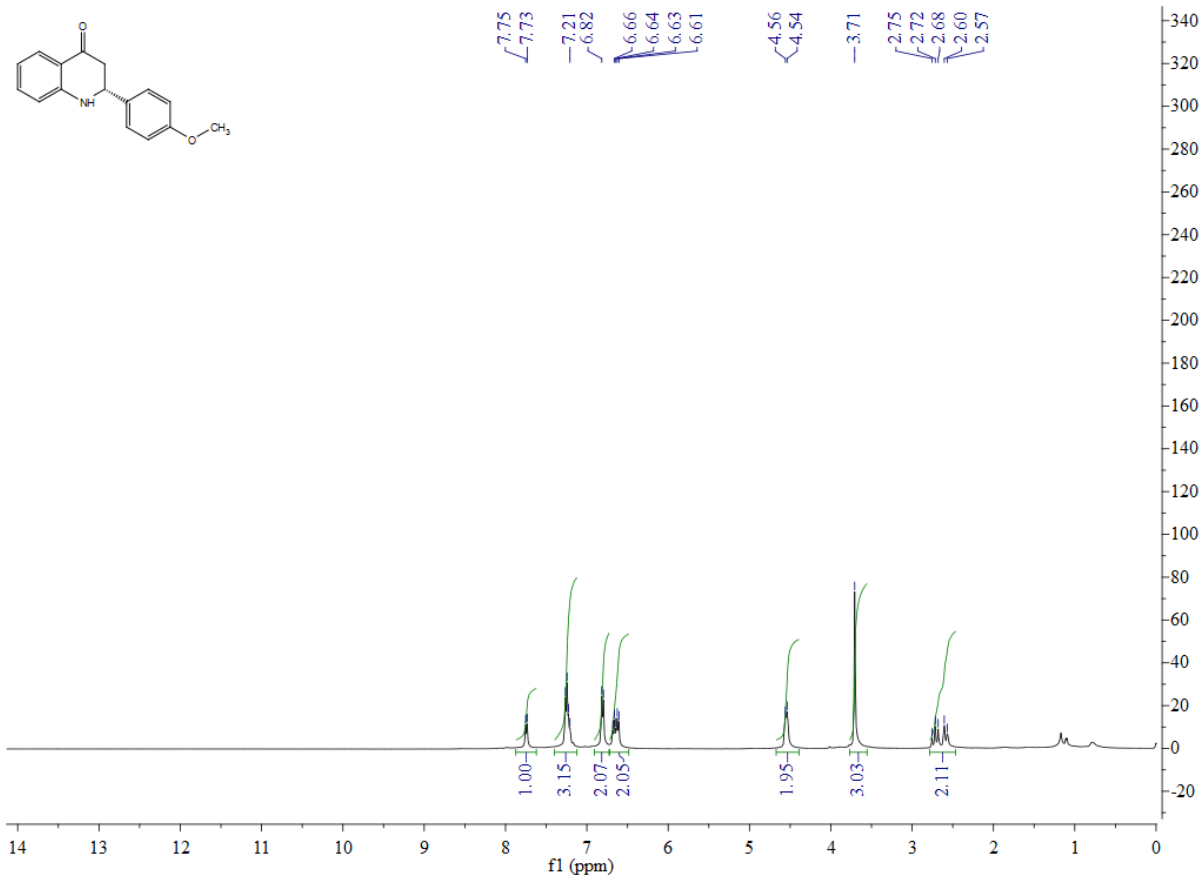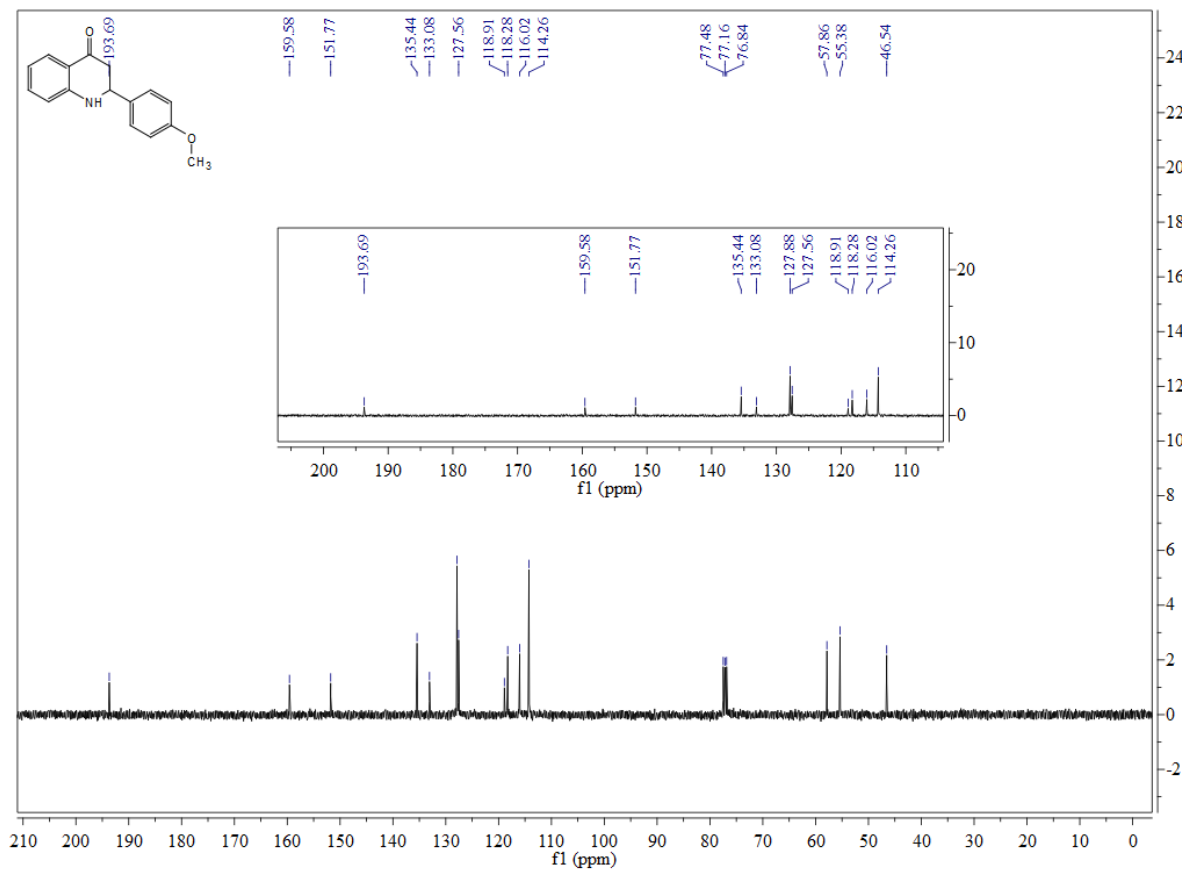

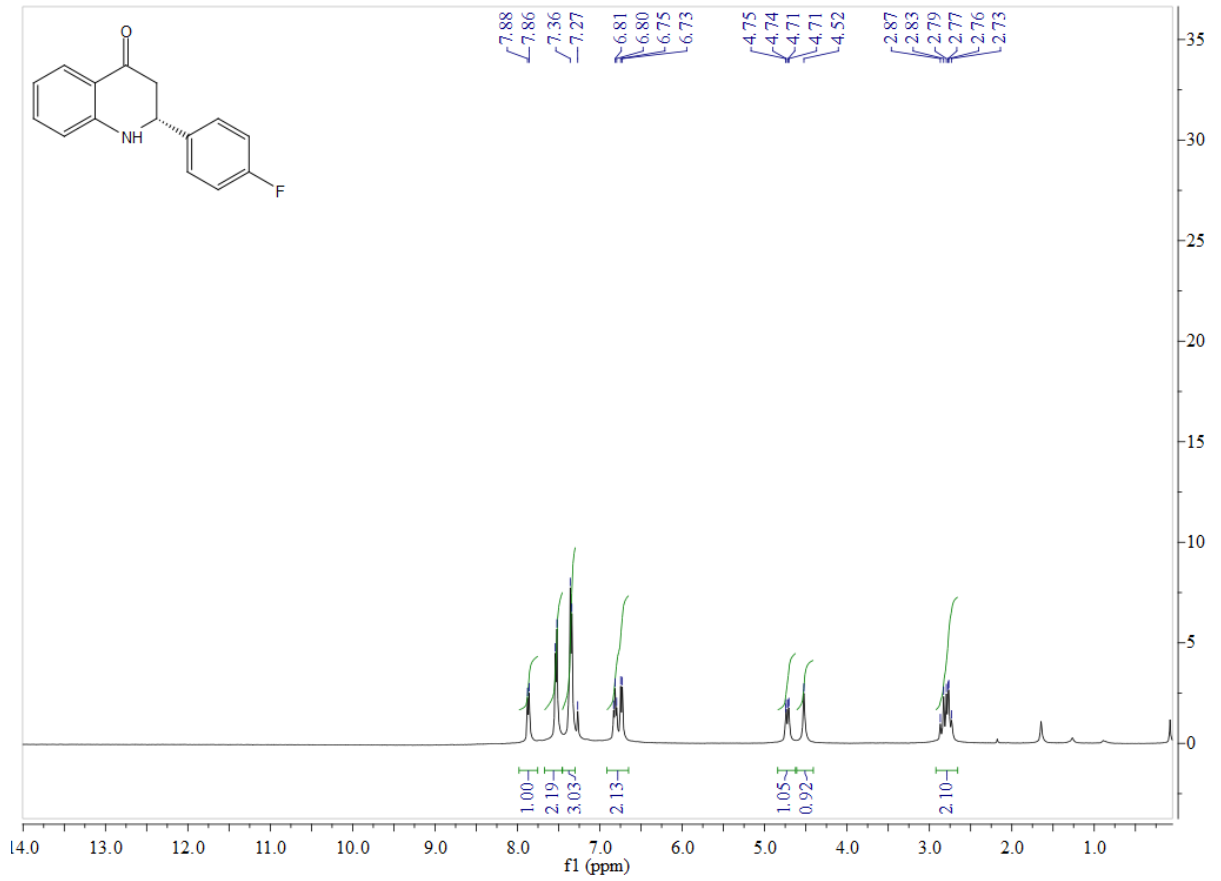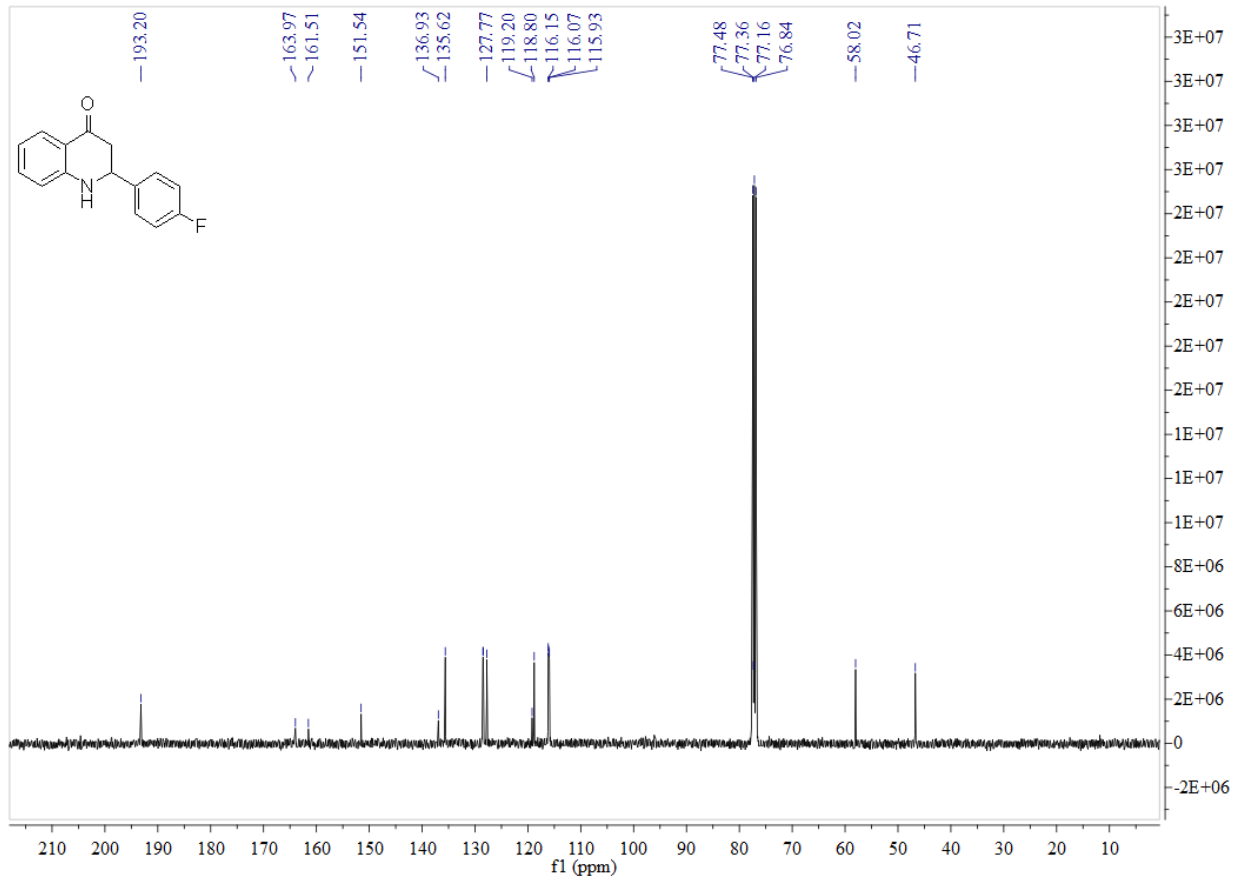

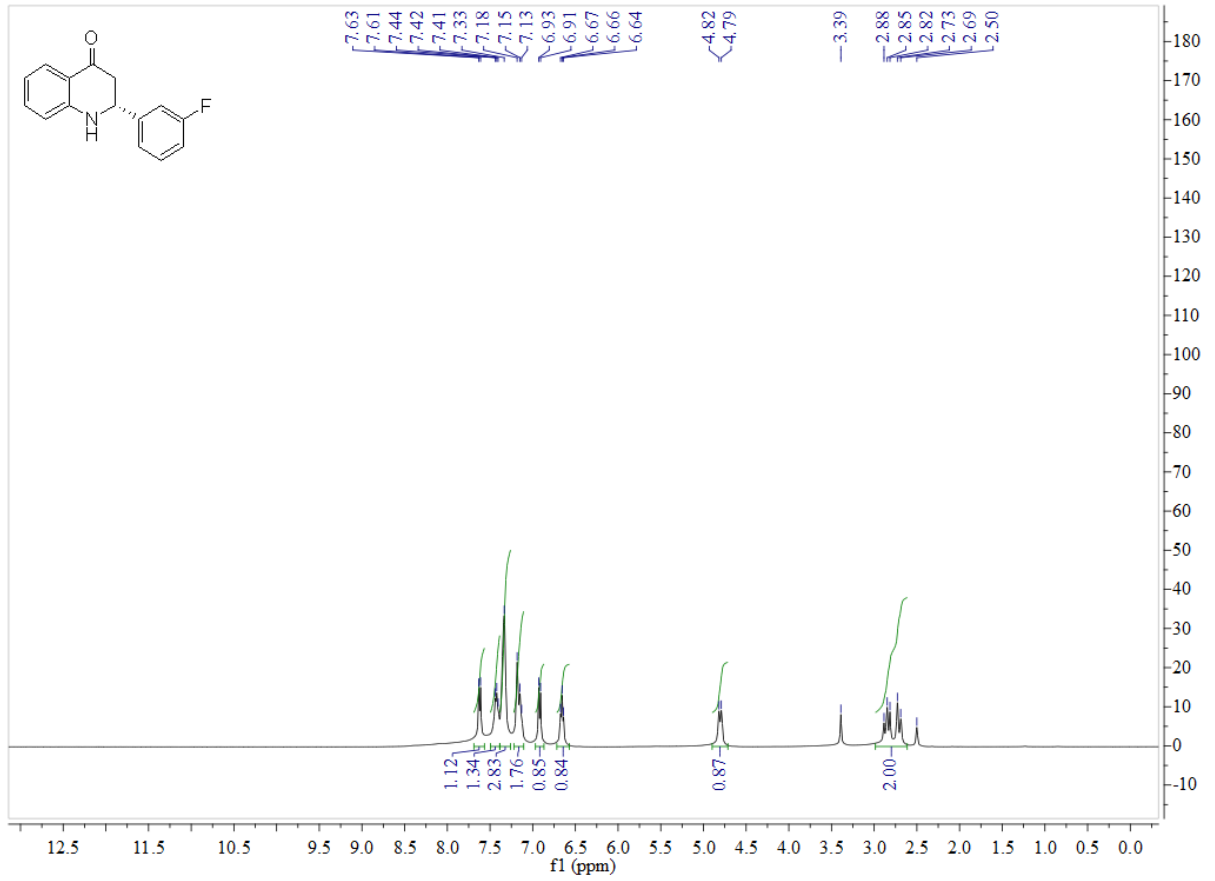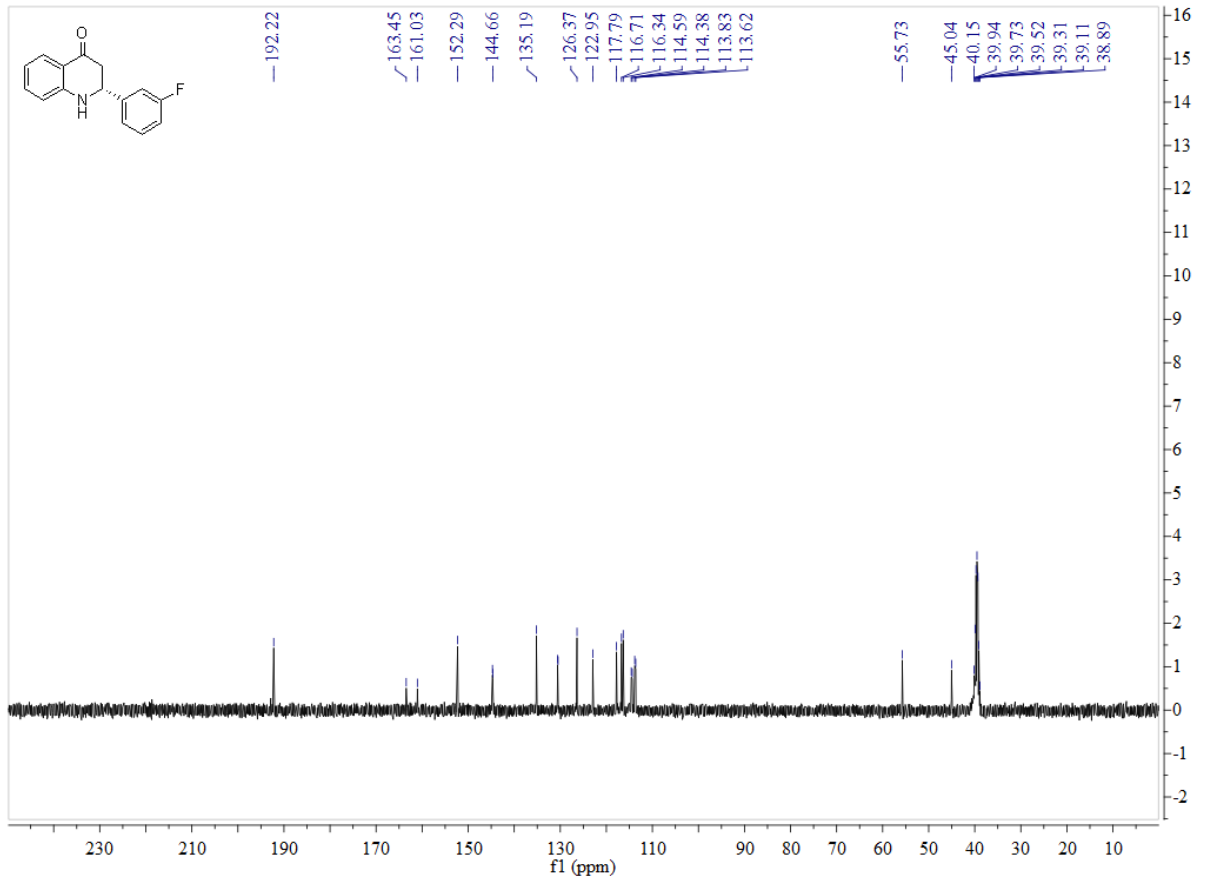

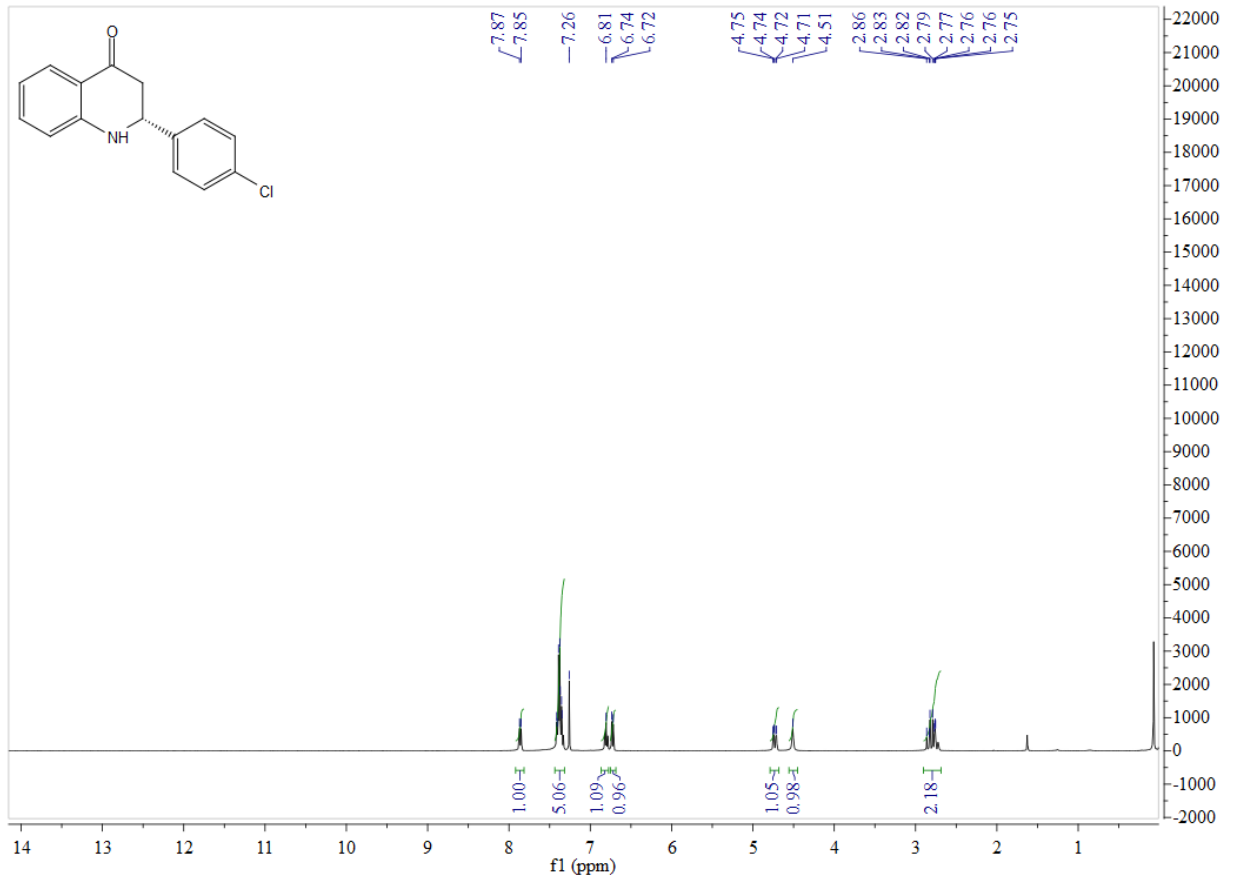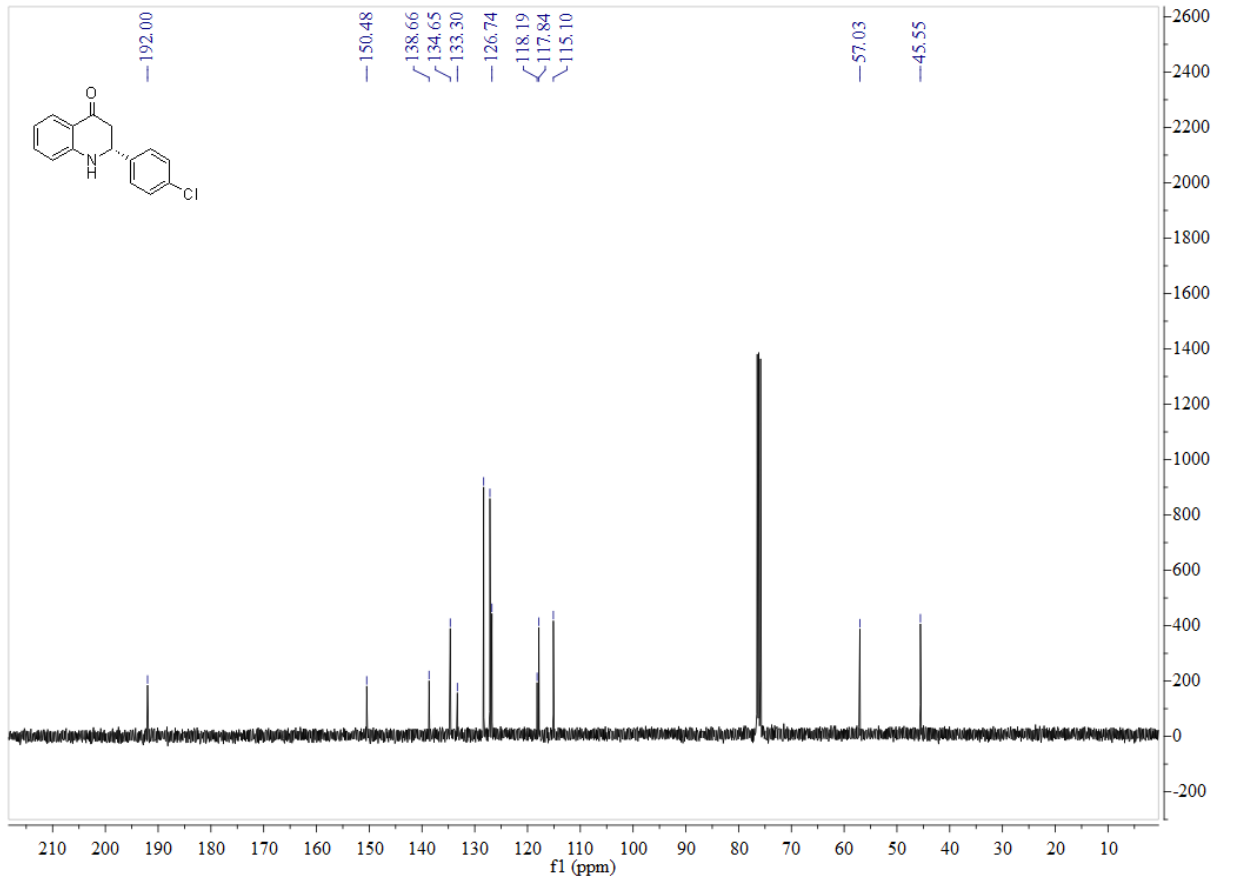

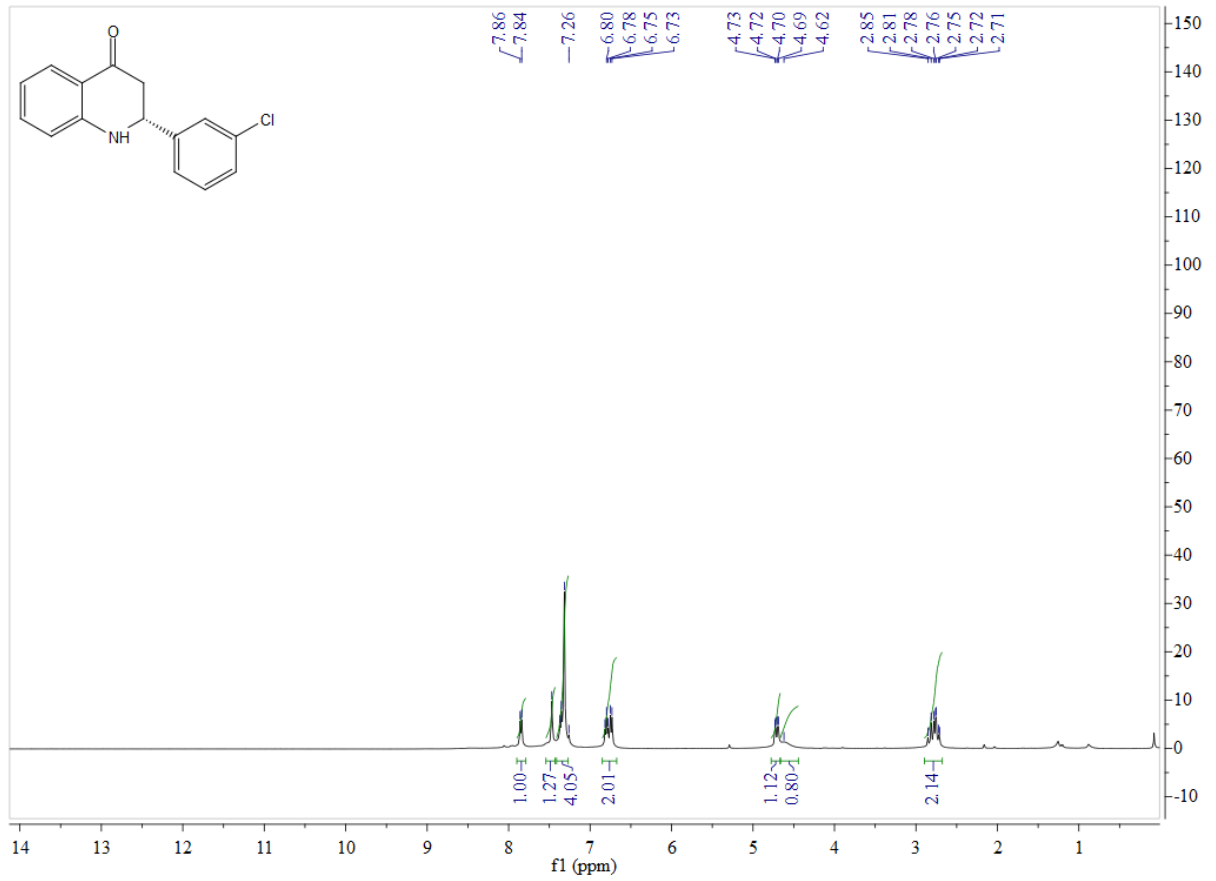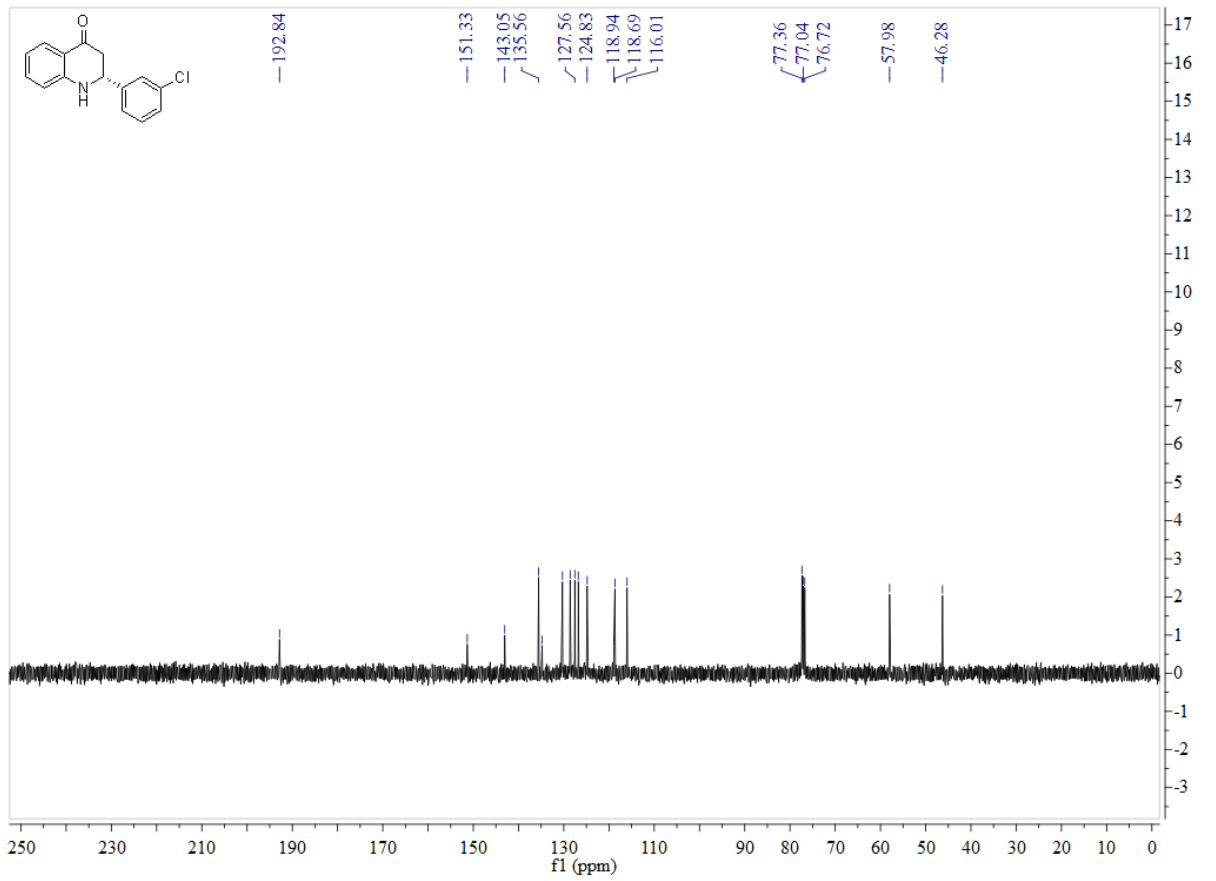

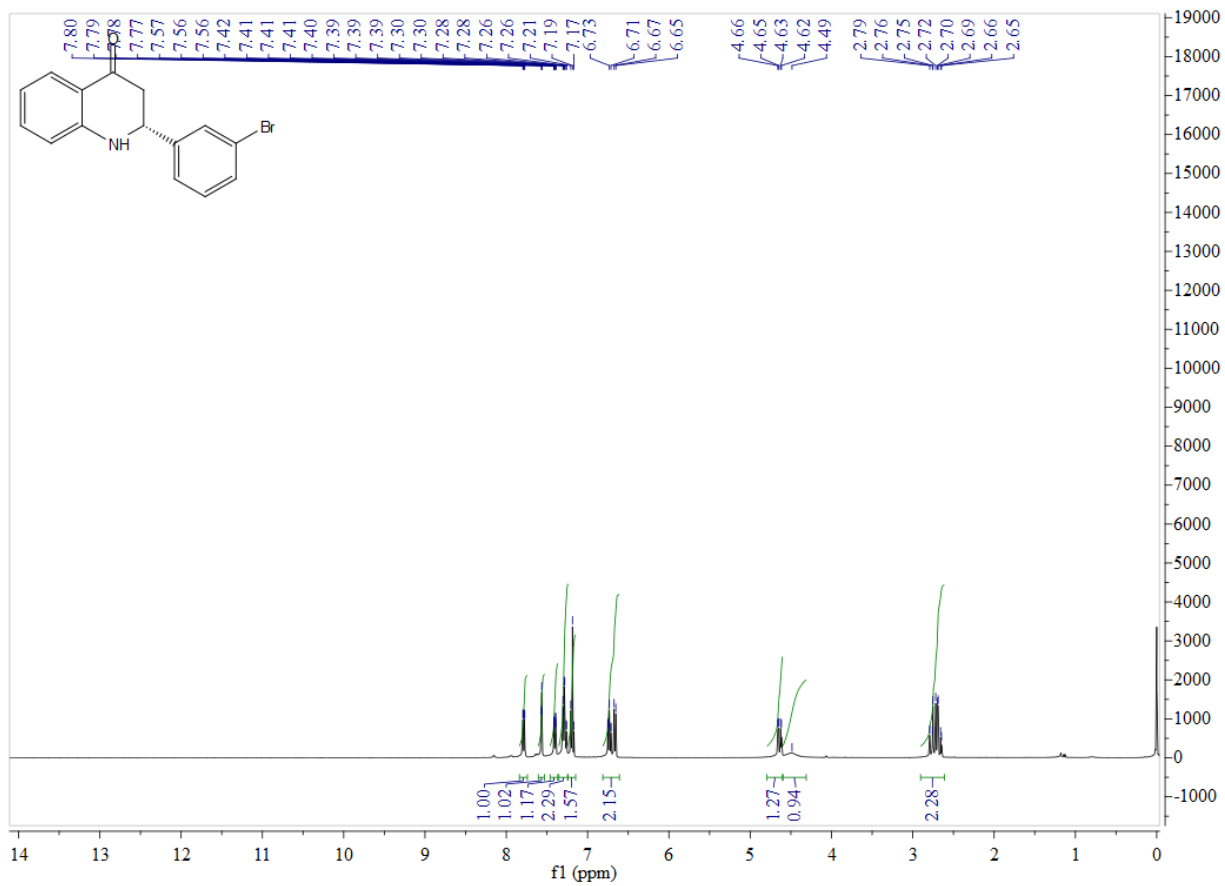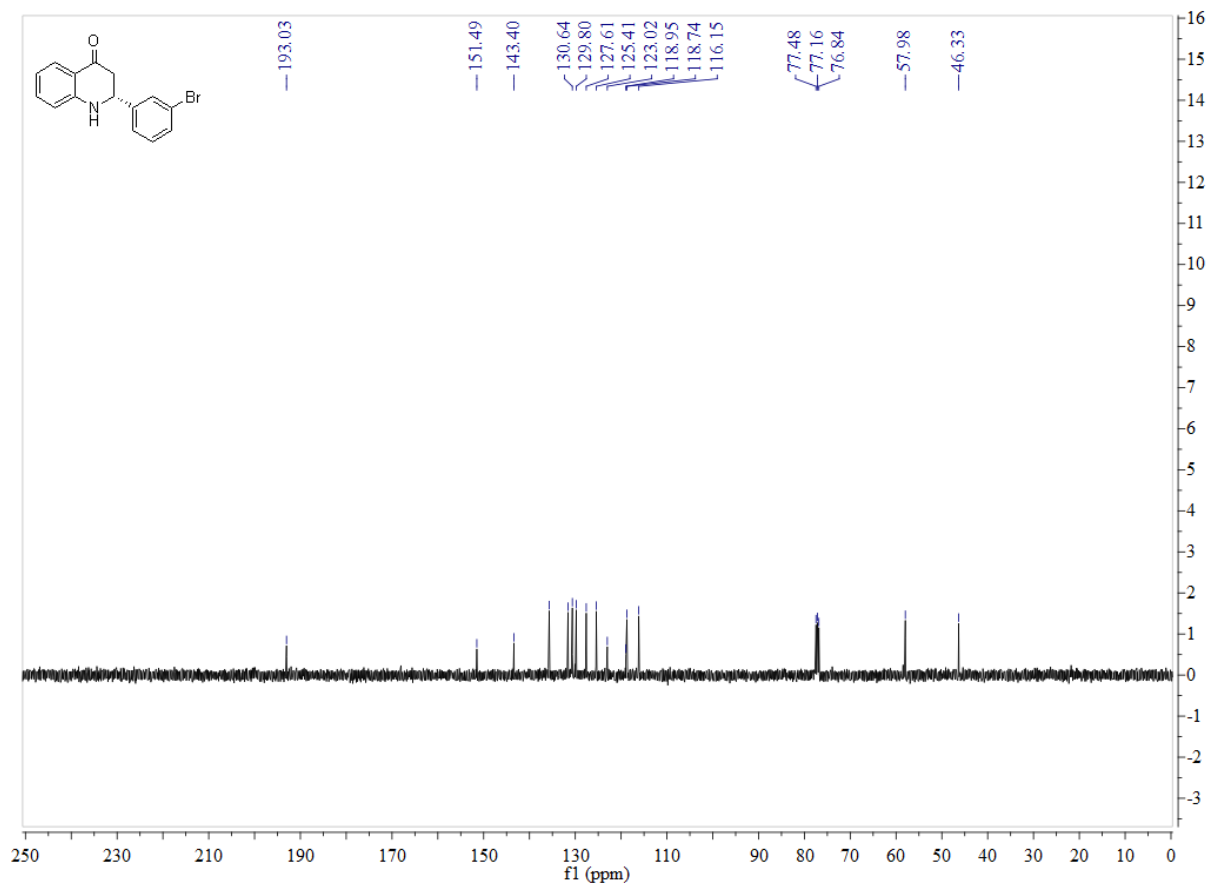



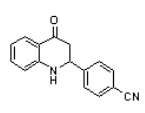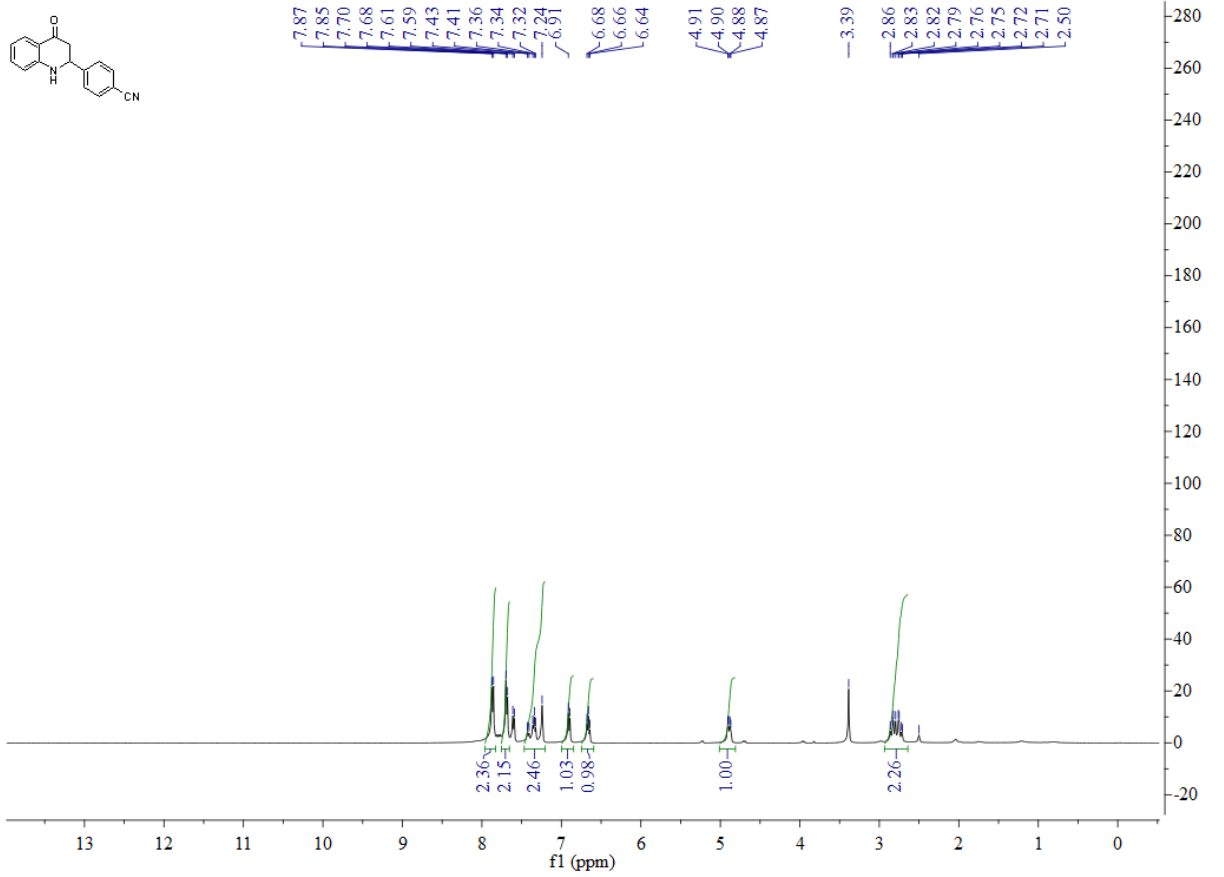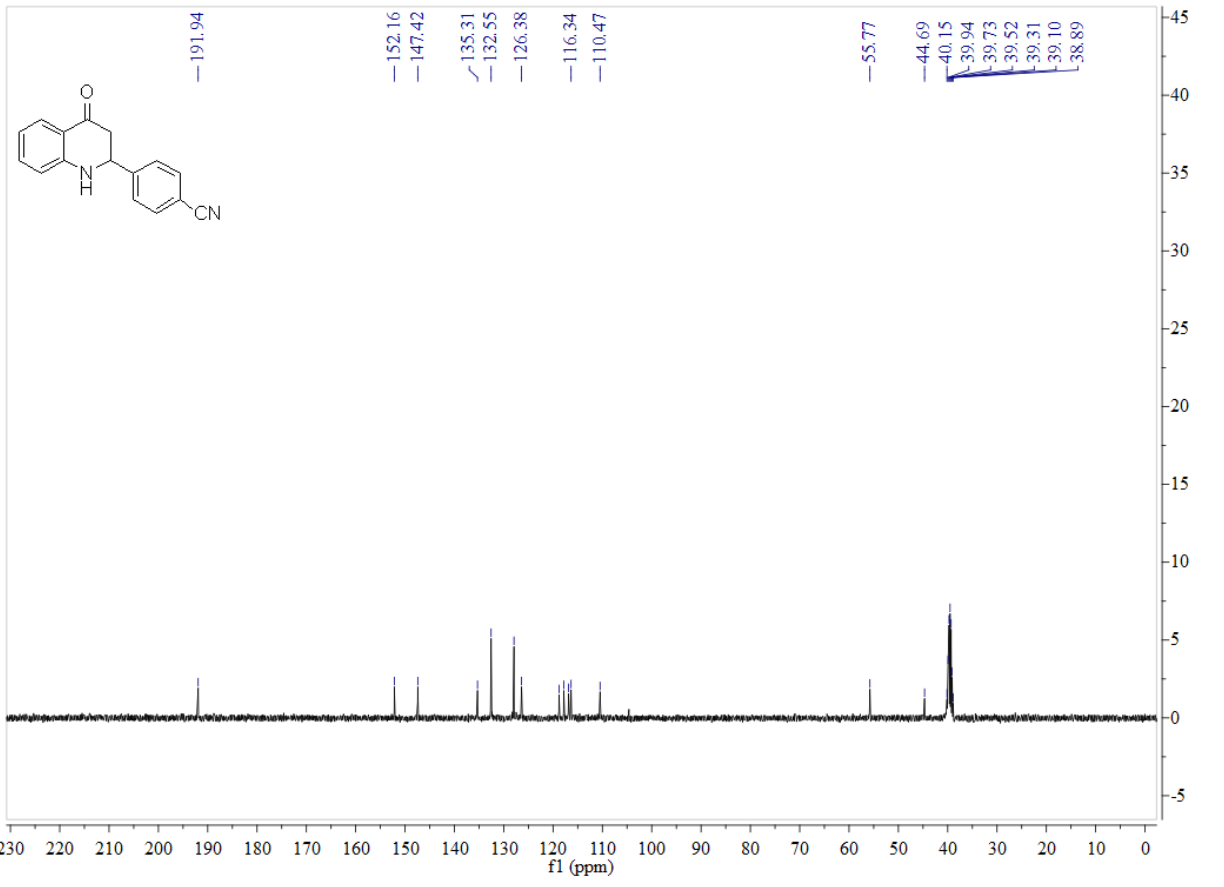

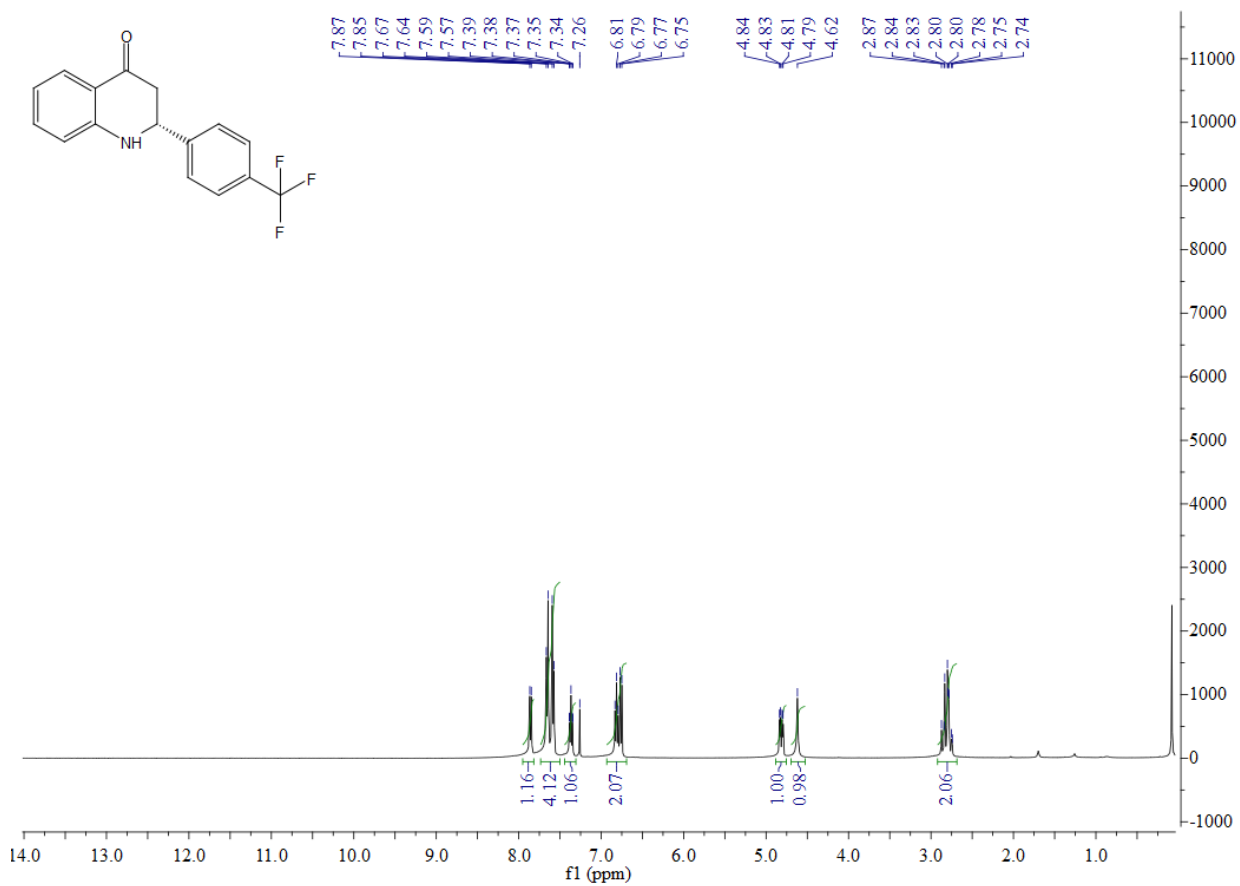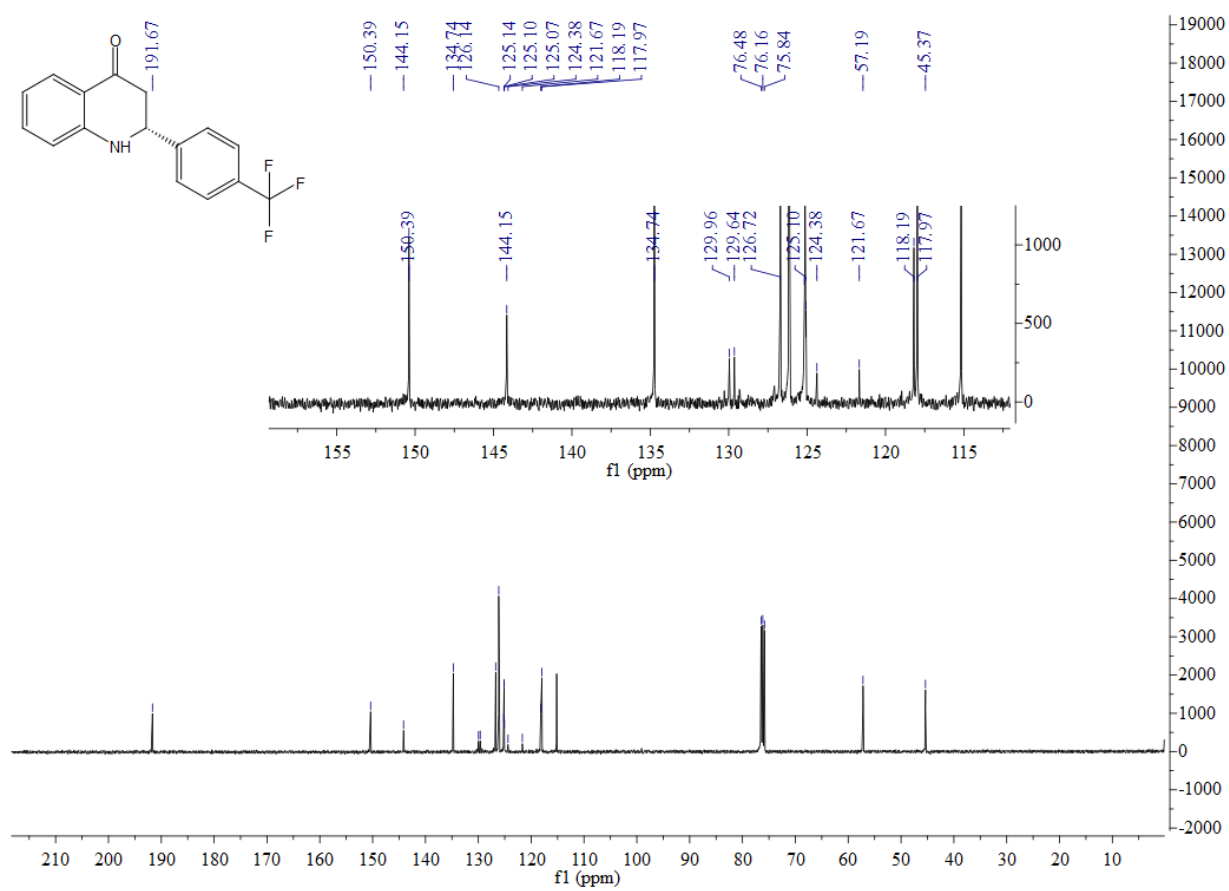

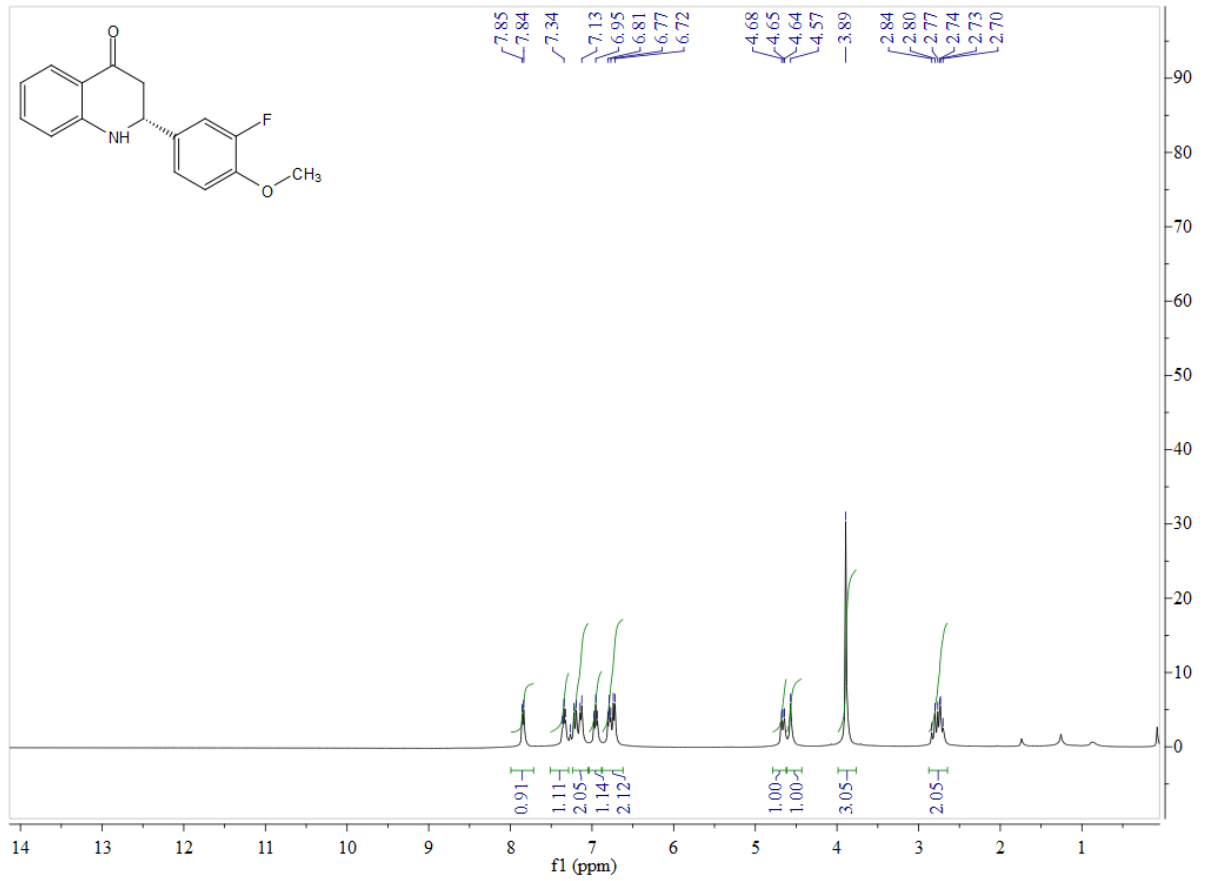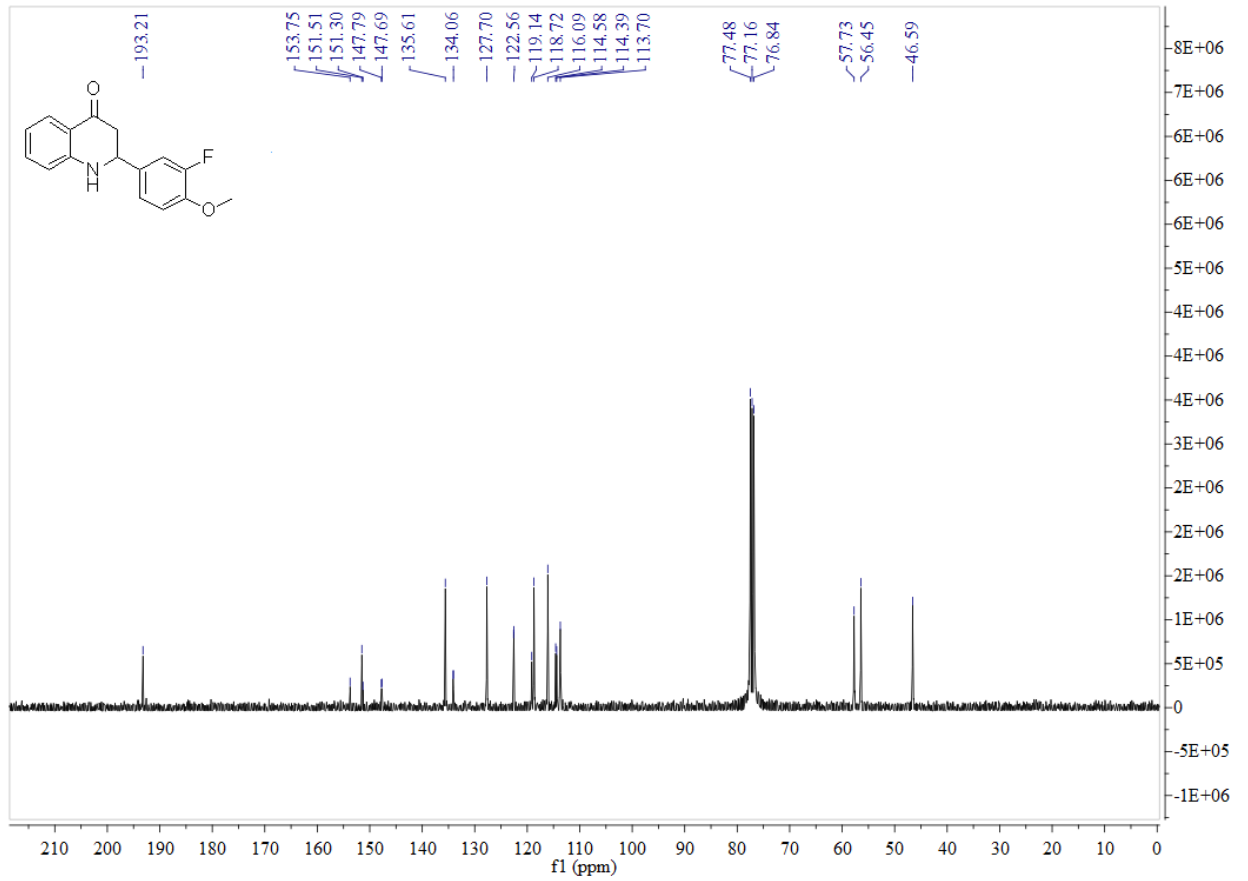

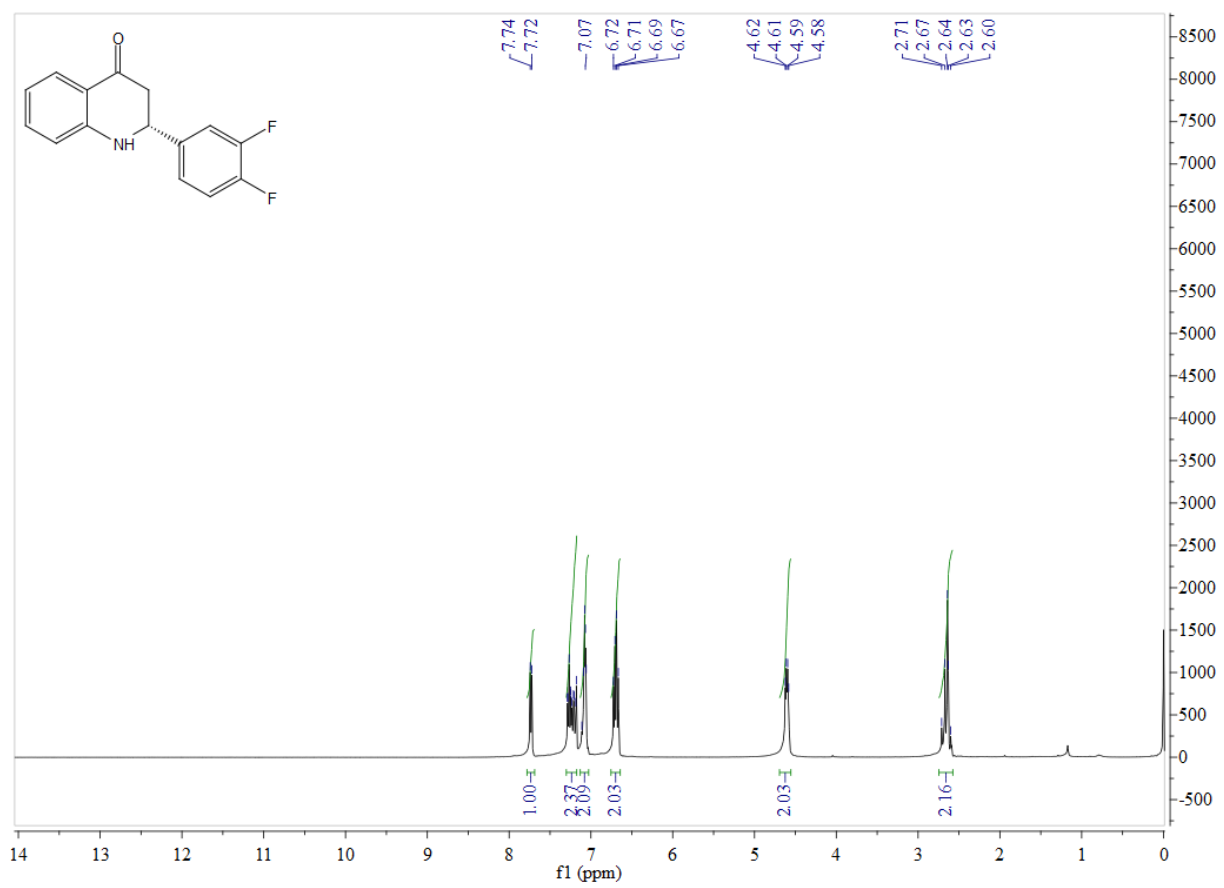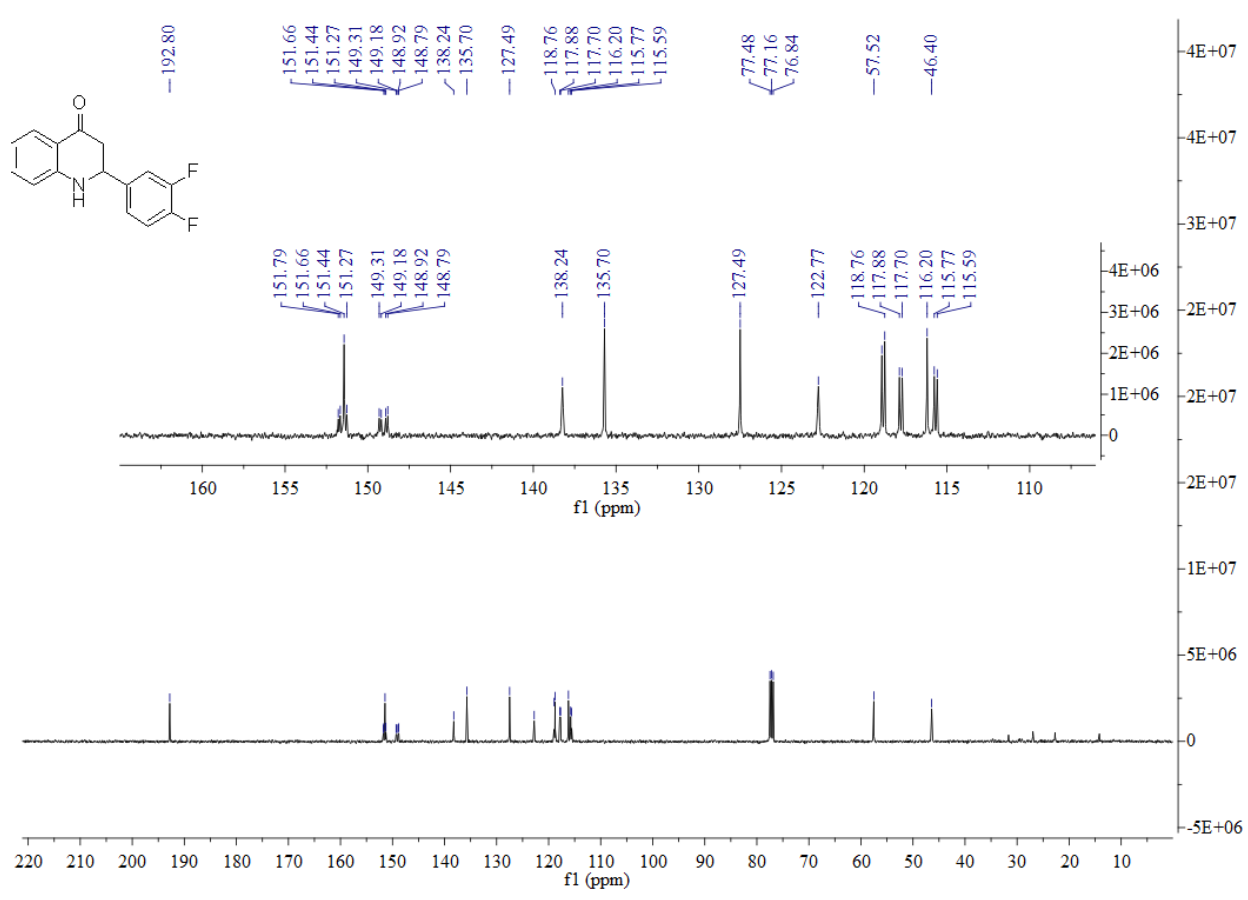

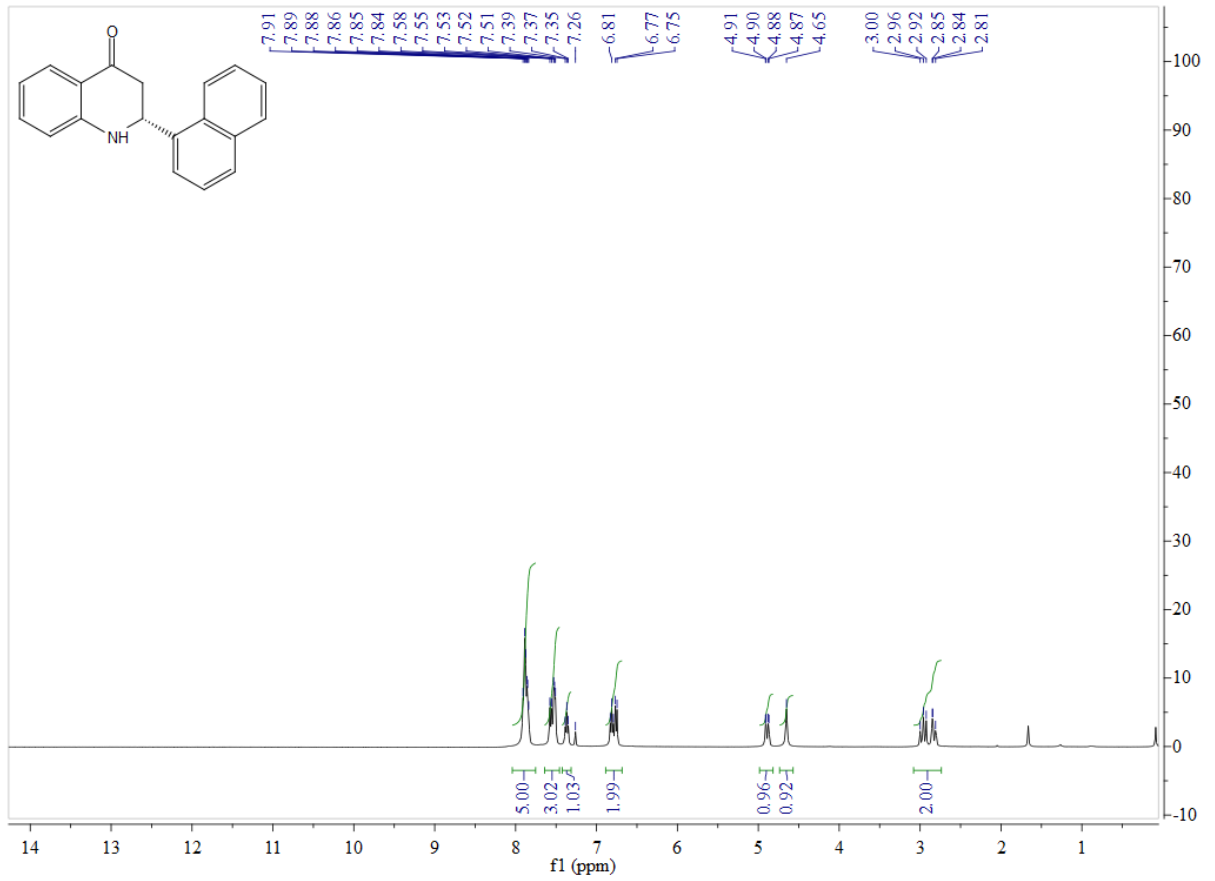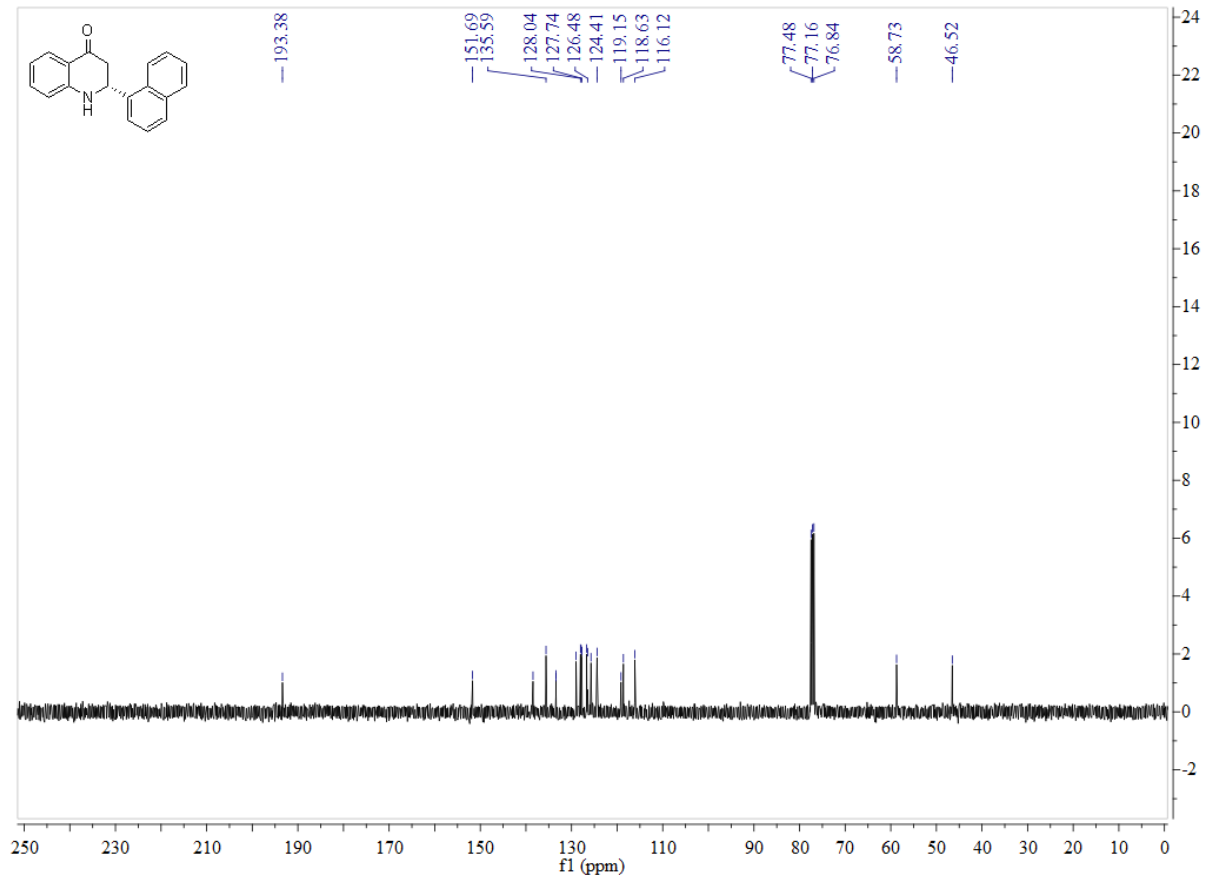

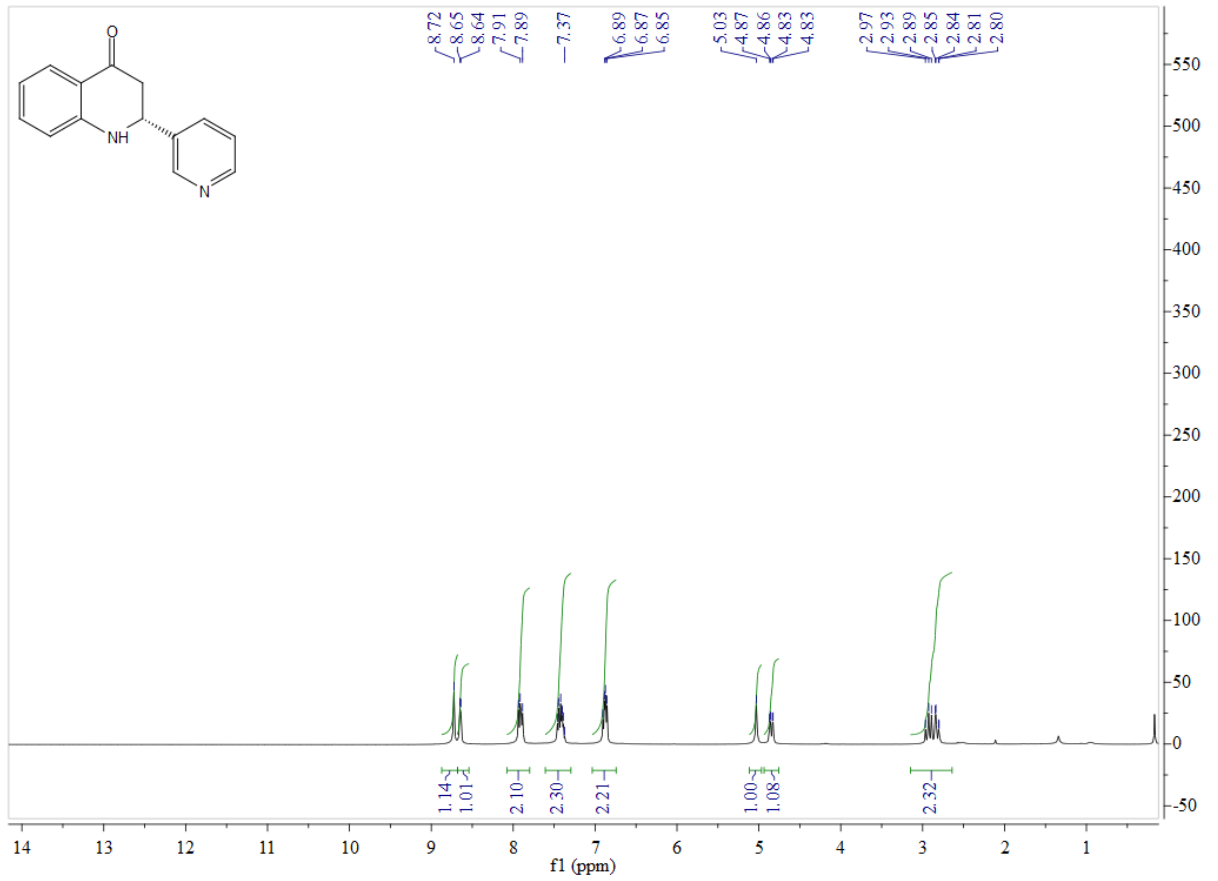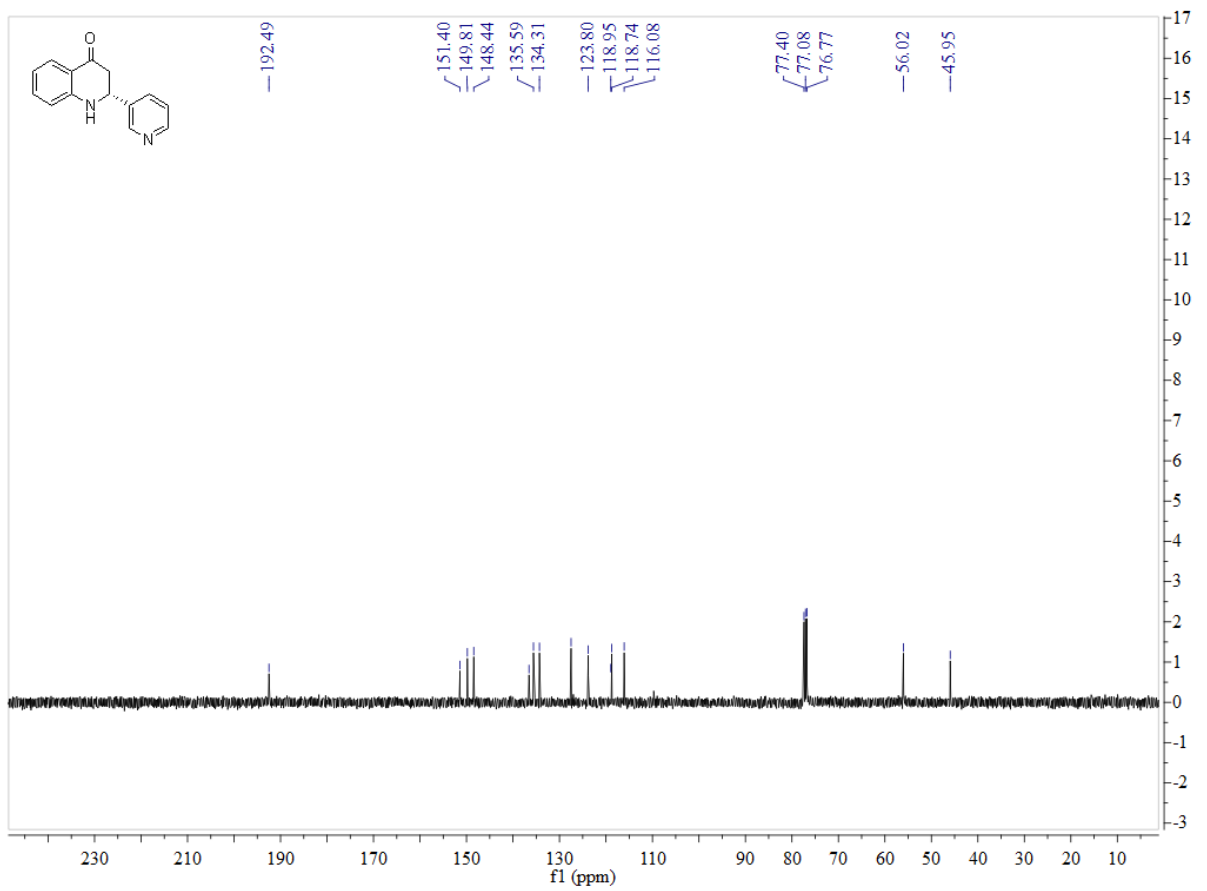

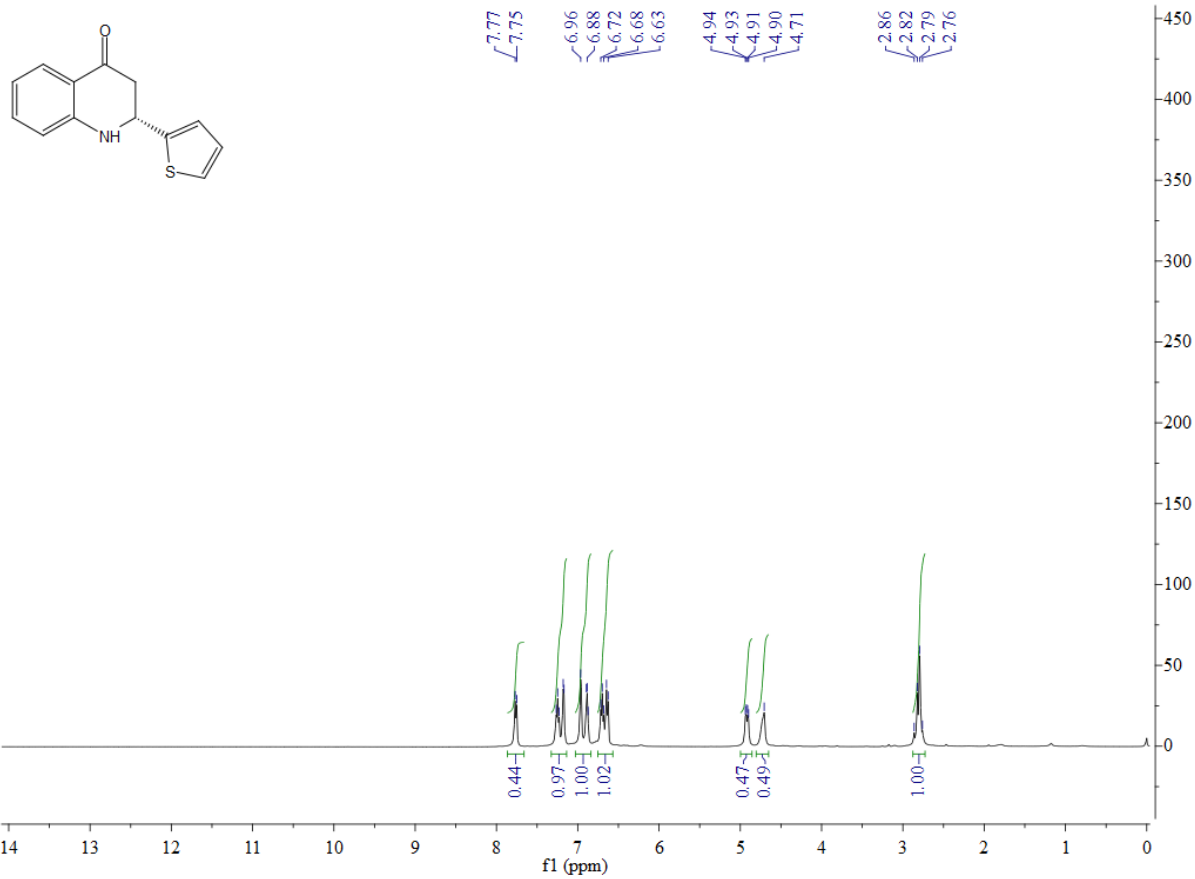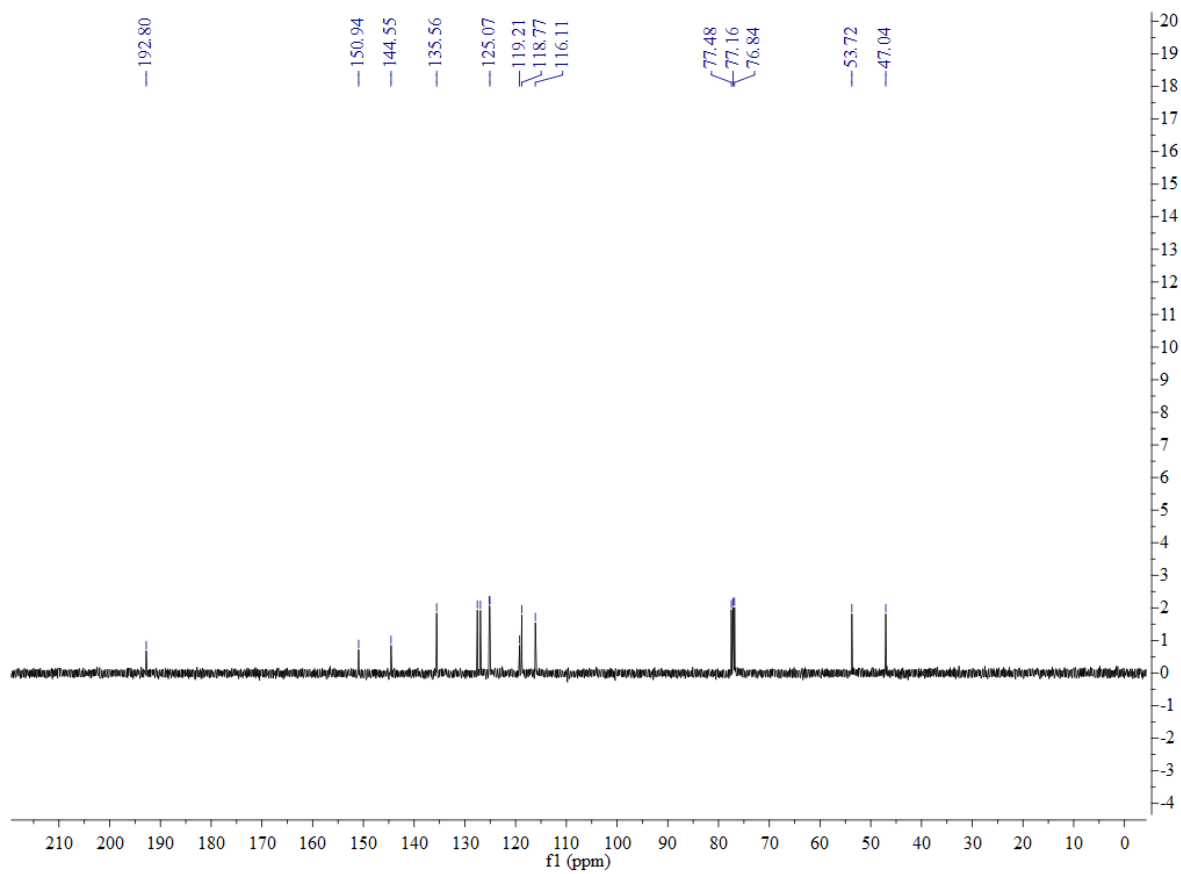

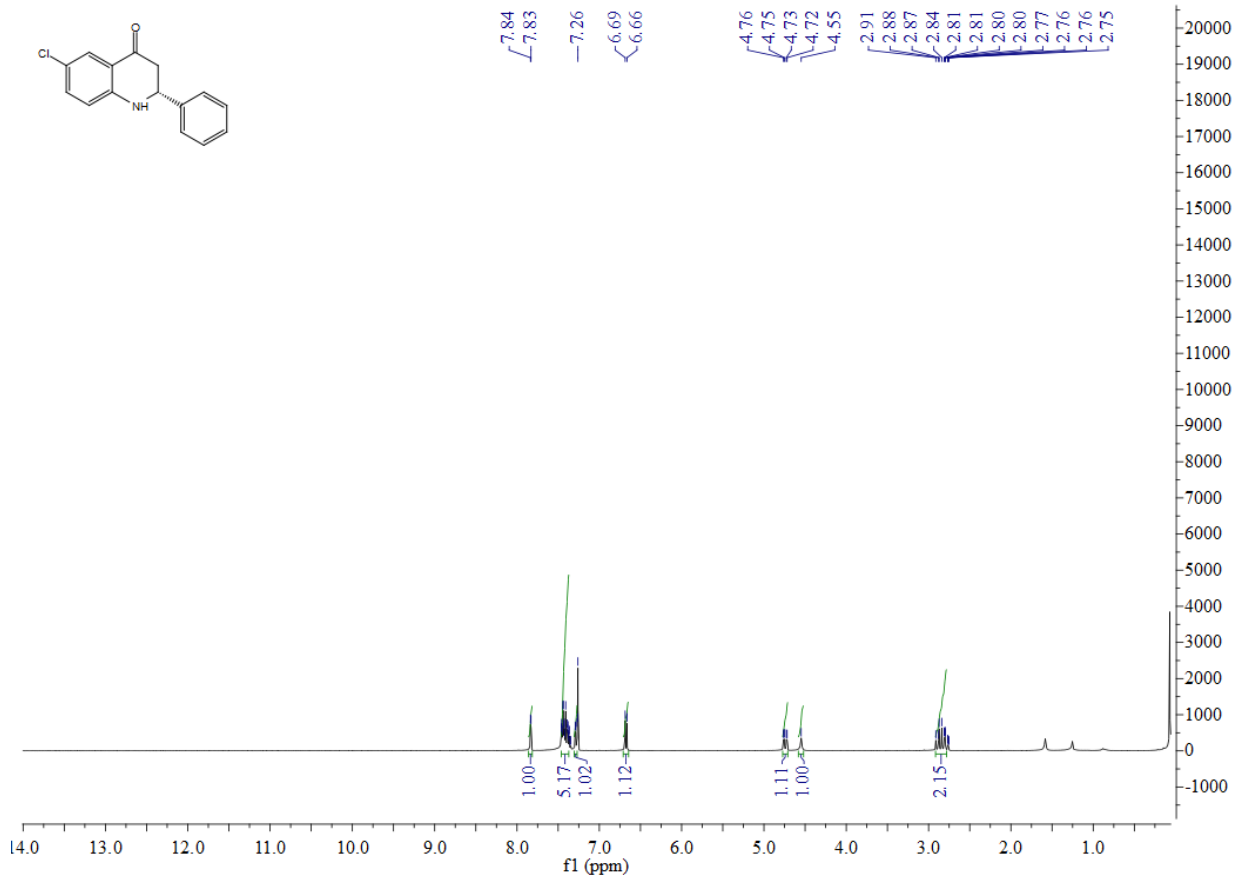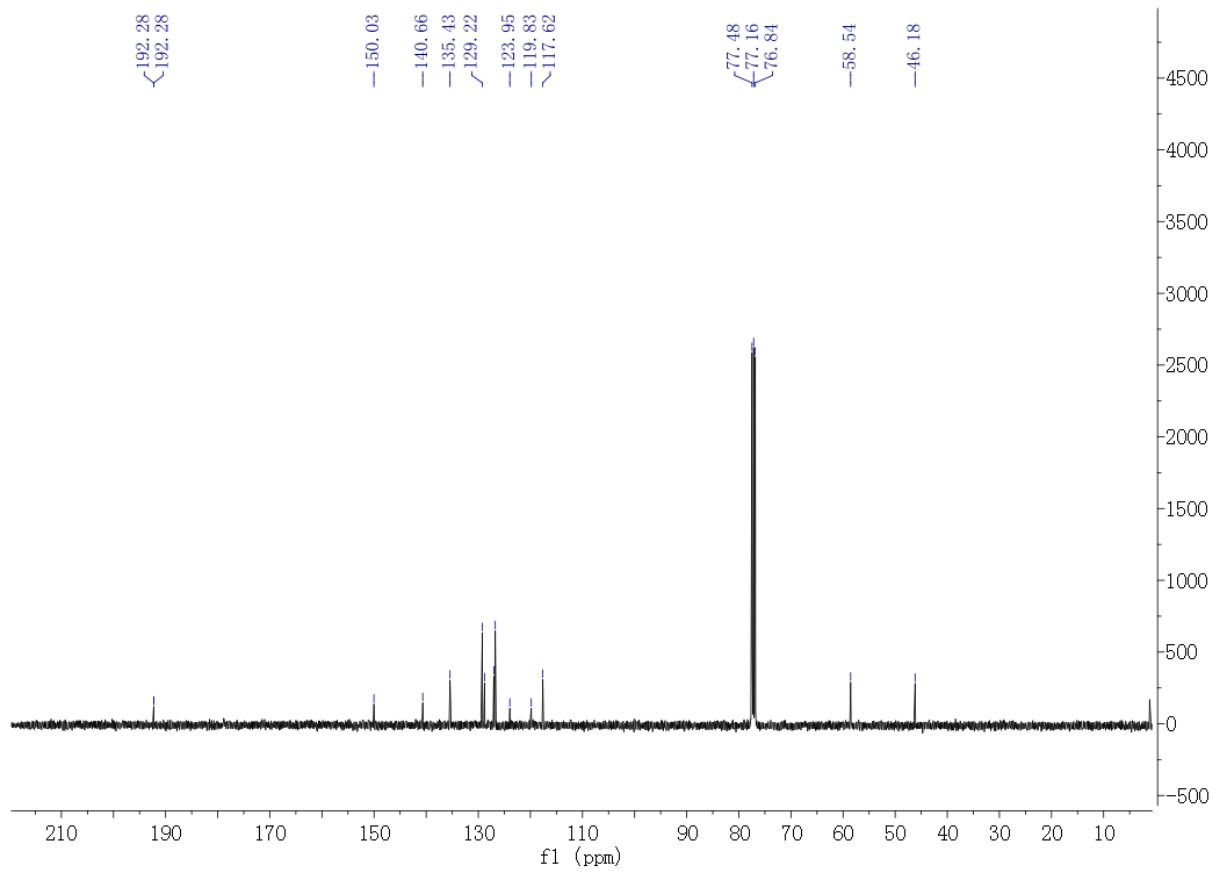



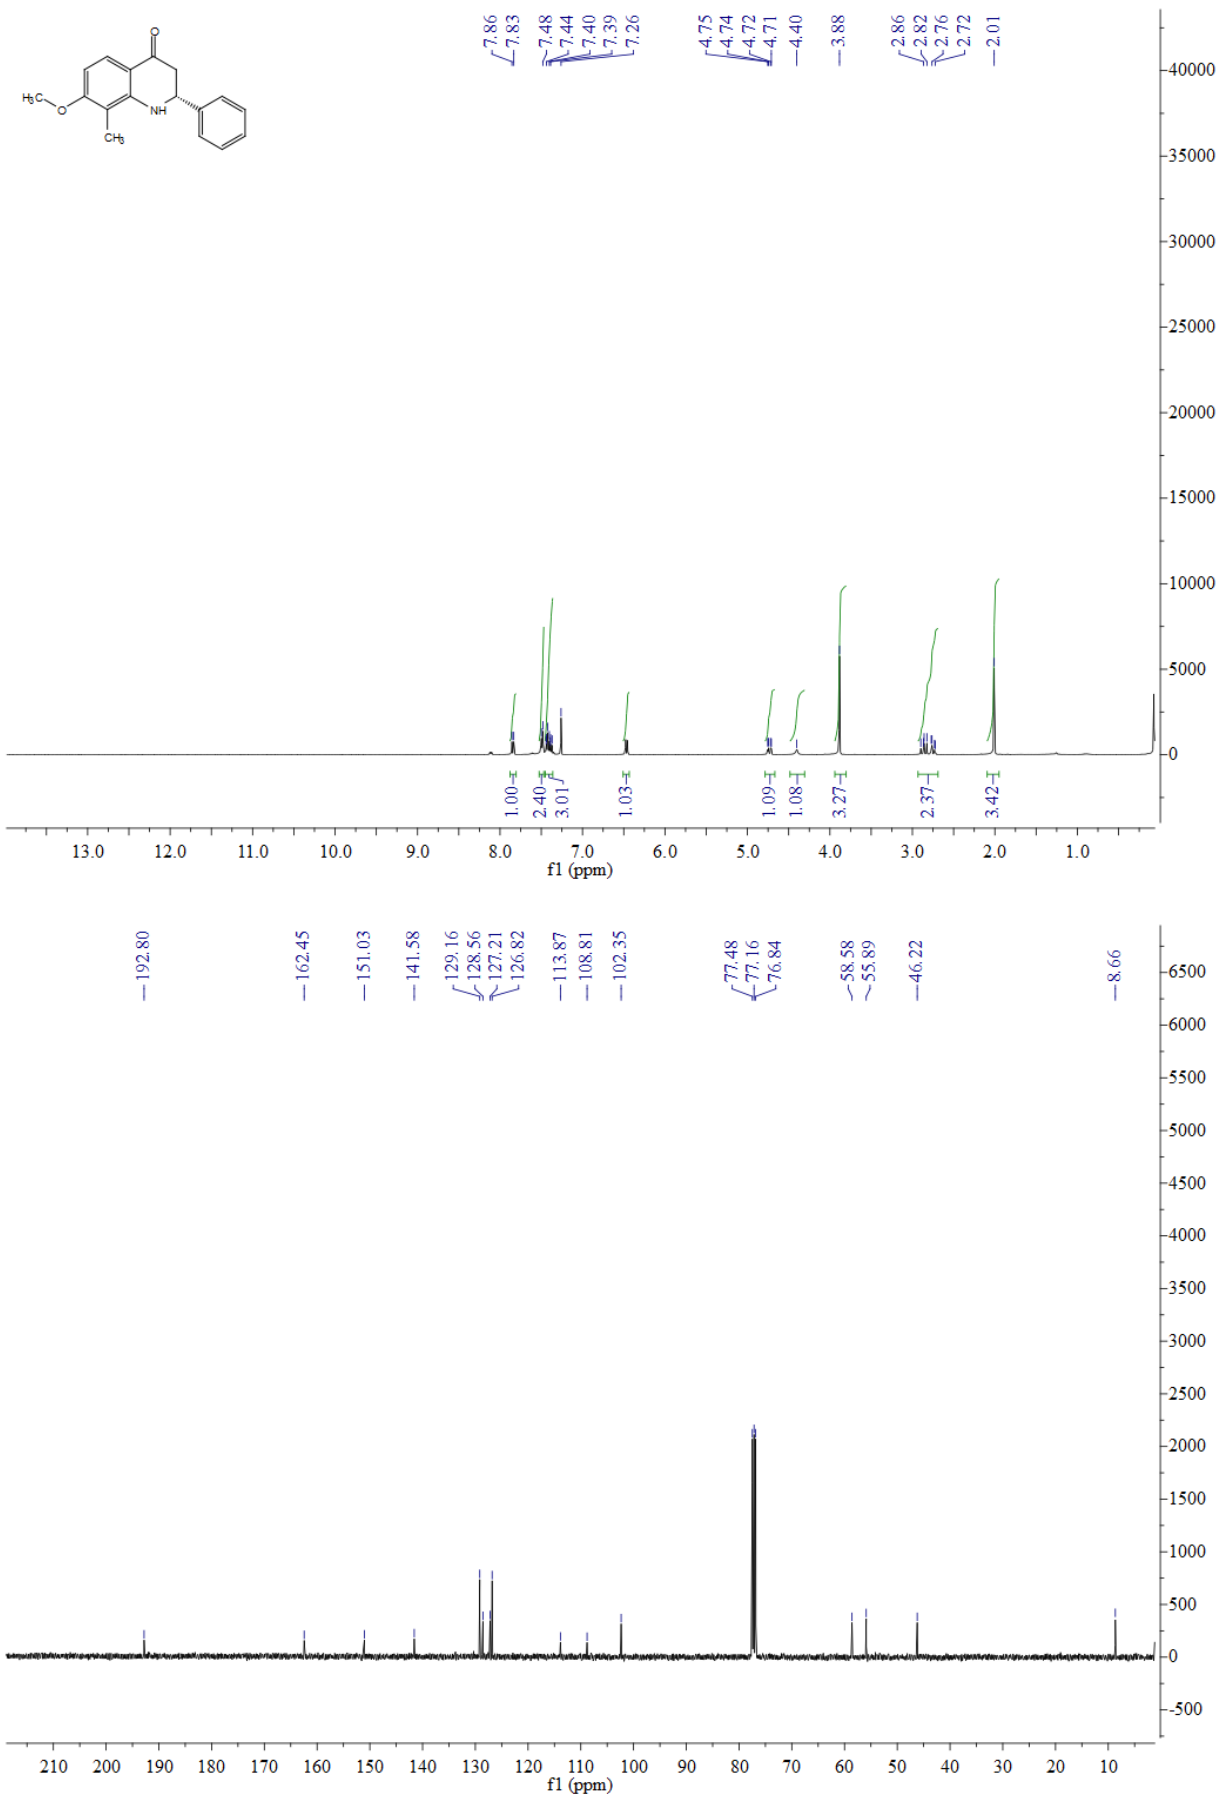

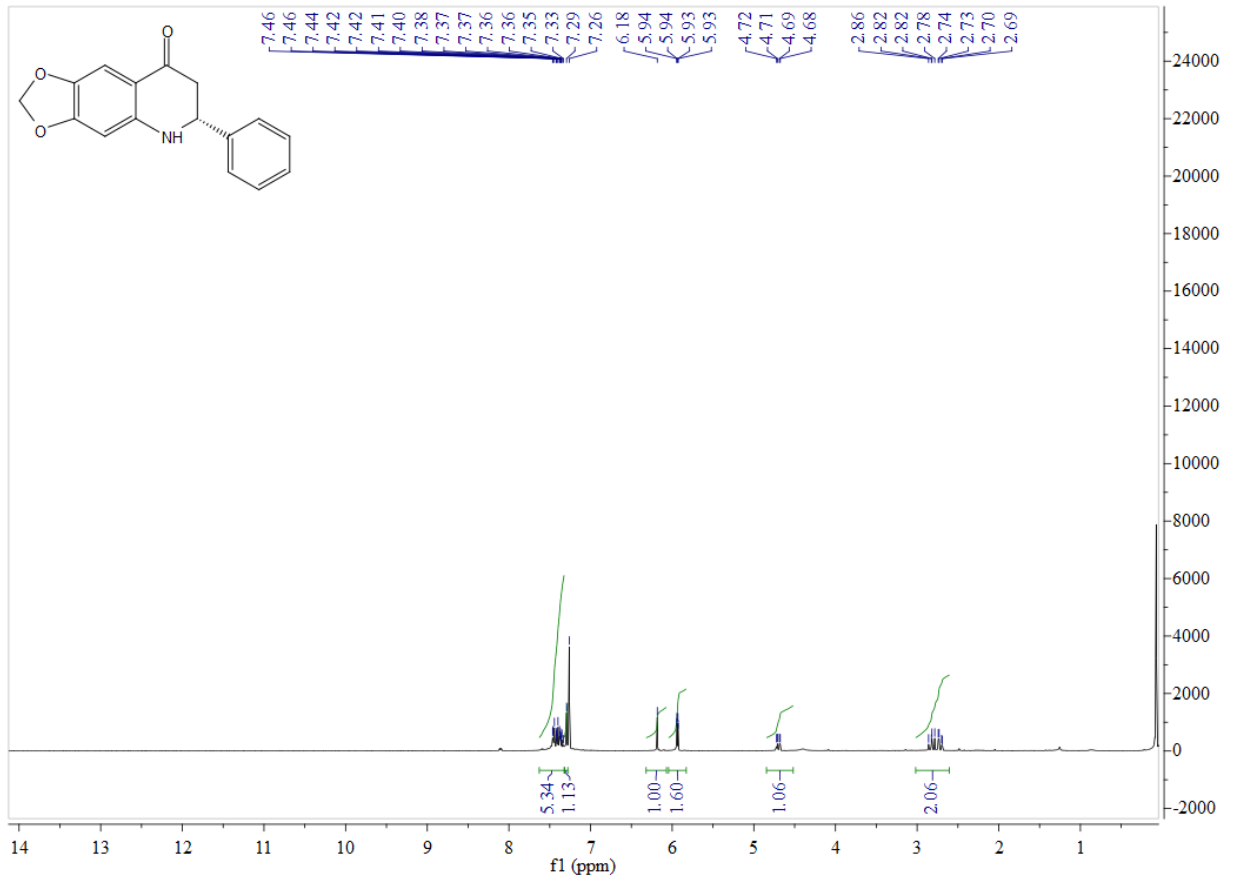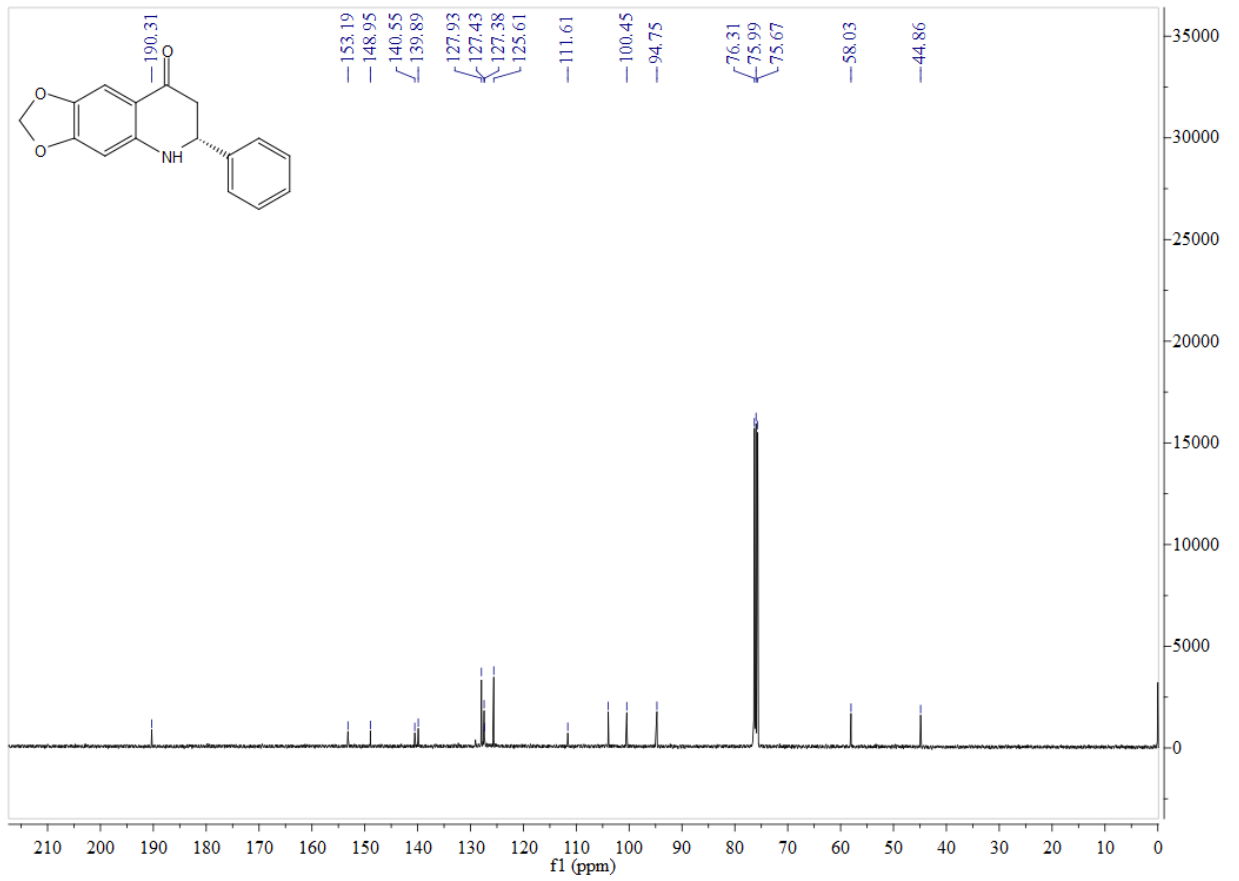

## 5. HPLC spectra:

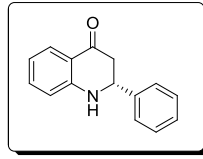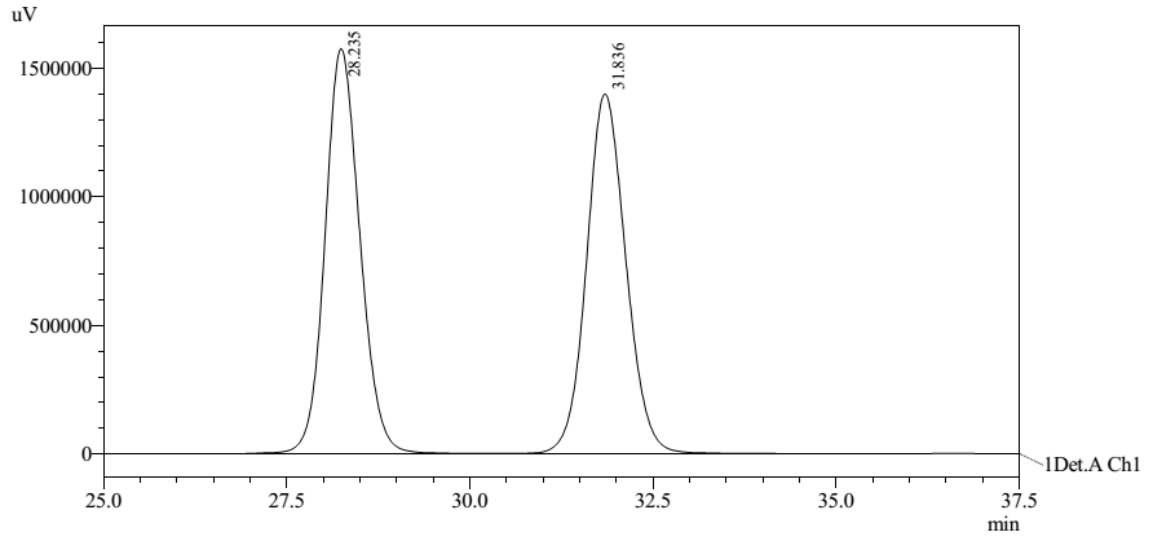

1 Det.A Ch1 / 214nm

PeakTable

检测器 A Ch1 214nm

| Peak# | Ret. Time | Area      | Height  | Area %  | Height % |
|-------|-----------|-----------|---------|---------|----------|
| 1     | 28.235    | 52261773  | 1574924 | 49.937  | 52.952   |
| 2     | 31.836    | 52392719  | 1399301 | 50.063  | 47.048   |
| Total |           | 104654493 | 2974225 | 100.000 | 100.000  |

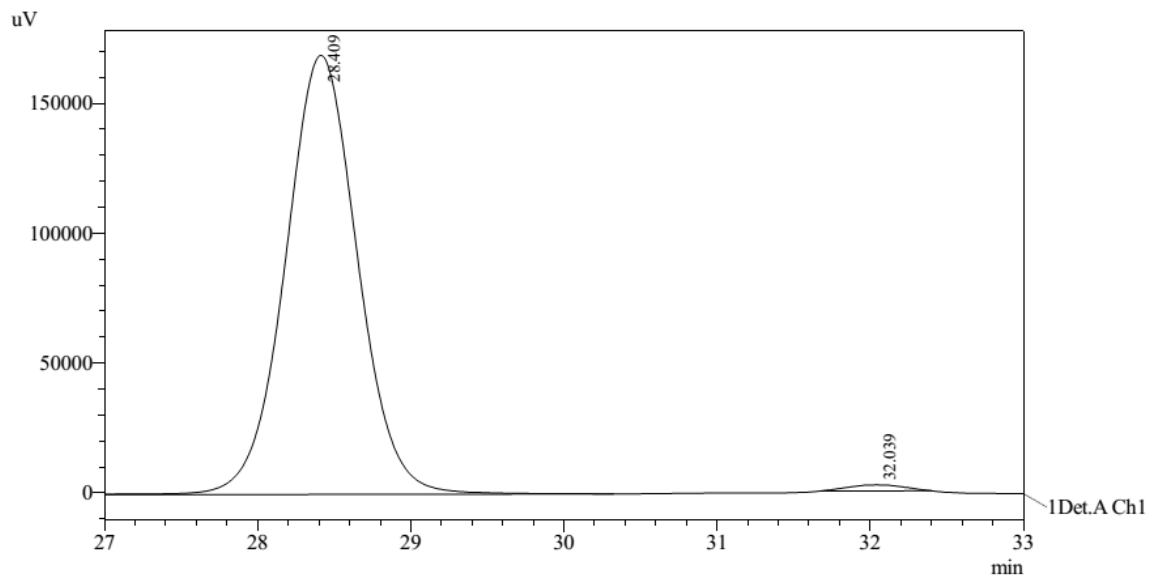

1 Det.A Ch1 / 214nm

PeakTable

检测器 A Ch1 214nm

| Peak# | Ret. Time | Area    | Height | Area %  | Height % |
|-------|-----------|---------|--------|---------|----------|
| 1     | 28.409    | 5548010 | 168979 | 98.948  | 98.639   |
| 2     | 32.039    | 58982   | 2332   | 1.052   | 1.361    |
| Total |           | 5606992 | 171311 | 100.000 | 100.000  |

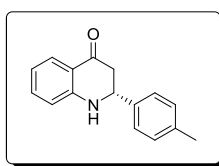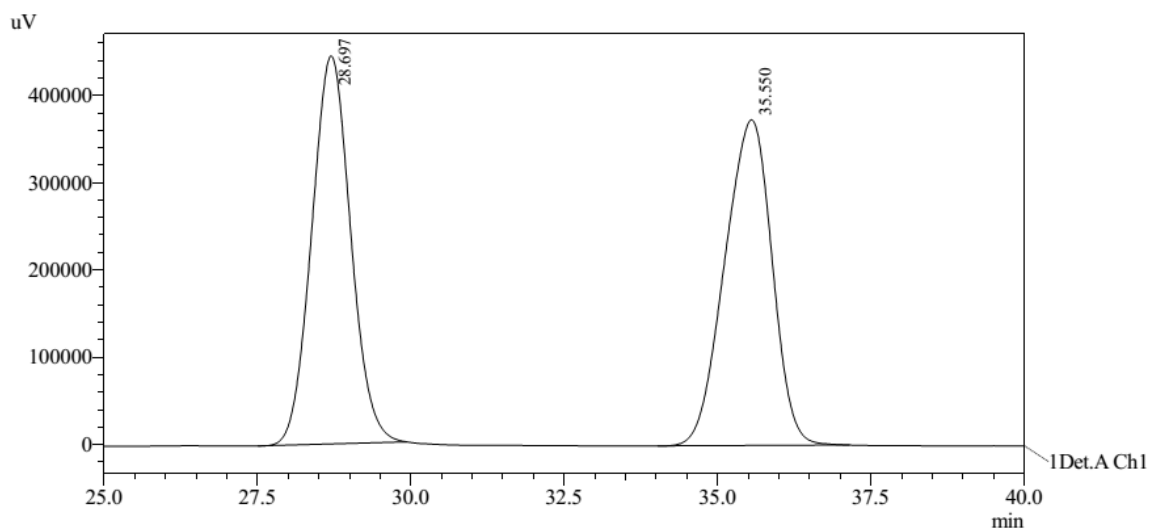

1 Det.A Ch1 / 214nm

PeakTable

| Peak# | Ret. Time | Area     | Height | Area %  | Height % |
|-------|-----------|----------|--------|---------|----------|
| 1     | 28.697    | 19671765 | 444649 | 49.531  | 54.374   |
| 2     | 35.550    | 20044505 | 373108 | 50.469  | 45.626   |
| Total |           | 39716270 | 817757 | 100.000 | 100.000  |

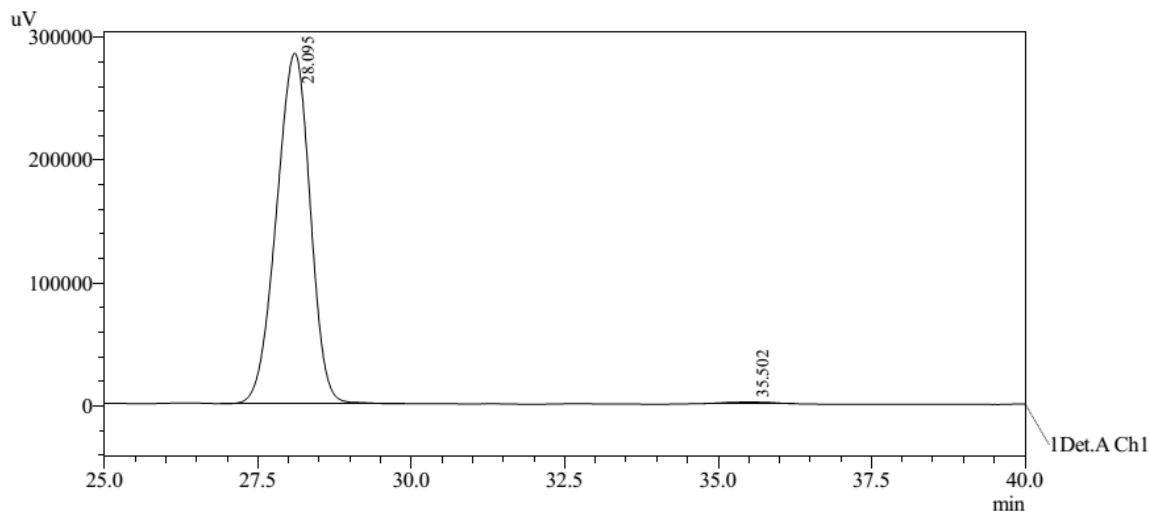

1 Det.A Ch1 / 214nm

PeakTable

| Peak# | Ret. Time | Area     | Height | Area %  | Height % |
|-------|-----------|----------|--------|---------|----------|
| 1     | 28.095    | 10910780 | 285351 | 99.382  | 99.490   |
| 2     | 35.502    | 67871    | 1461   | 0.618   | 0.510    |
| Total |           | 10978651 | 286812 | 100.000 | 100.000  |

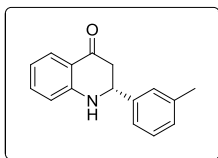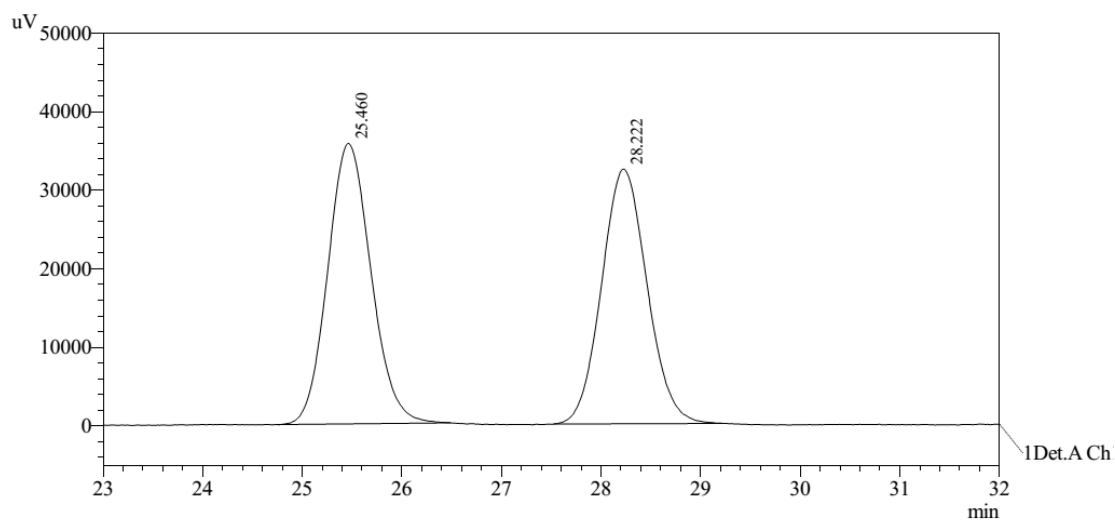

1 Det.A Ch1 / 214nm

PeakTable

检测器 A Ch1 214nm

| Peak# | Ret. Time | Area    | Height | Area %  | Height % |
|-------|-----------|---------|--------|---------|----------|
| 1     | 25.460    | 1079151 | 35701  | 51.192  | 52.409   |
| 2     | 28.222    | 1028912 | 32418  | 48.808  | 47.591   |
| Total |           | 2108064 | 68119  | 100.000 | 100.000  |

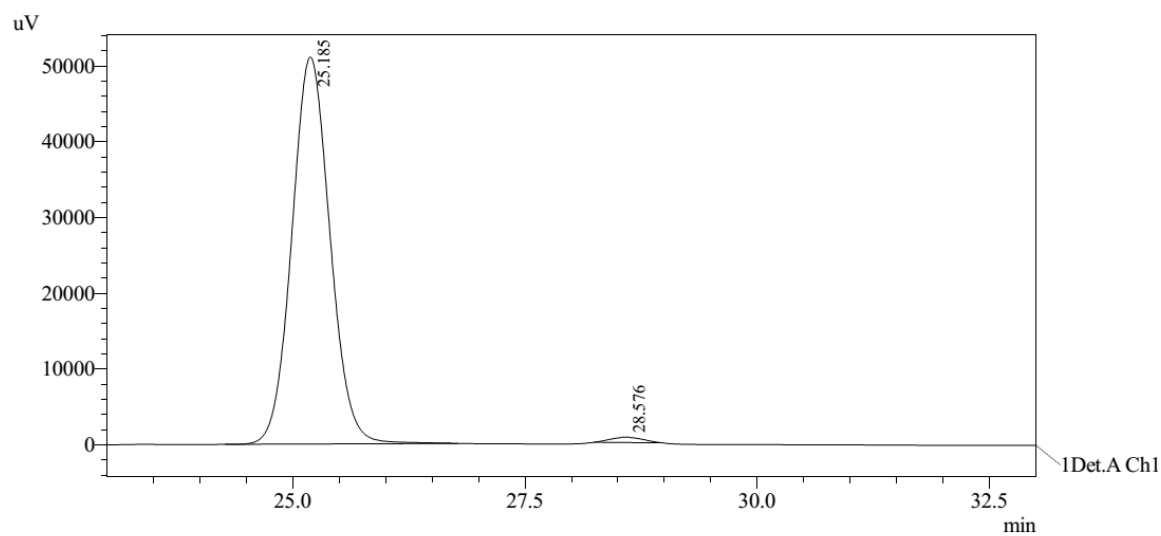

1 Det.A Ch1 / 254nm

PeakTable

检测器 A Ch1 254nm

| Peak# | Ret. Time | Area    | Height | Area %  | Height % |
|-------|-----------|---------|--------|---------|----------|
| 1     | 25.185    | 1457941 | 51031  | 98.853  | 98.662   |
| 2     | 28.576    | 16922   | 692    | 1.147   | 1.338    |
| Total |           | 1474864 | 51723  | 100.000 | 100.000  |

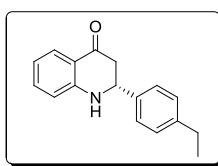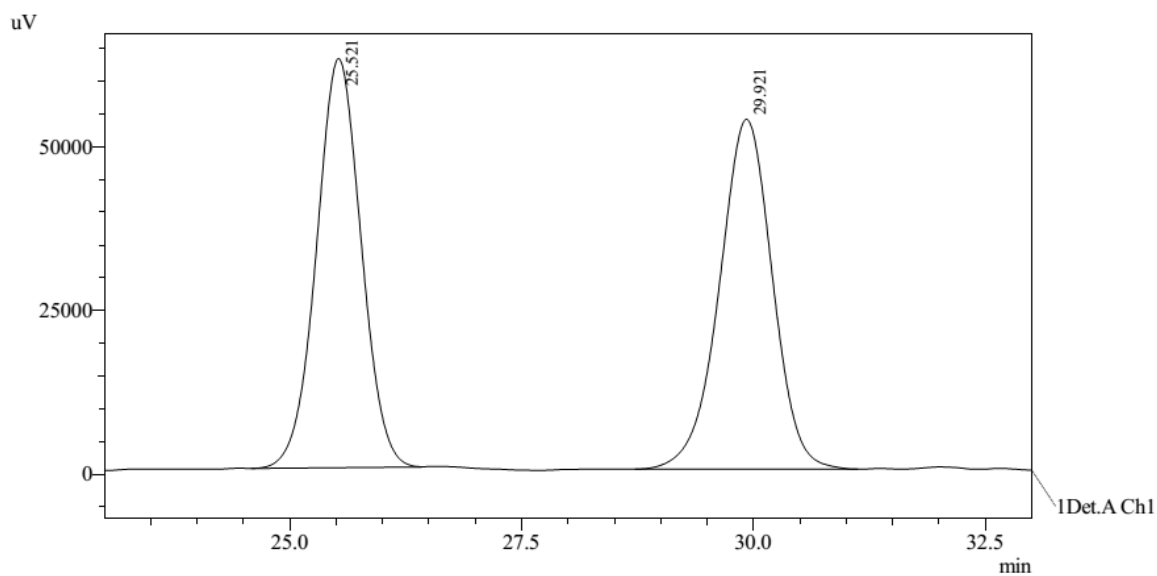

1 Det.A Ch1 / 254nm

PeakTable

检测器 A Ch1 254nm

| Peak# | Ret. Time | Area    | Height | Area %  | Height % |
|-------|-----------|---------|--------|---------|----------|
| 1     | 25.521    | 2094913 | 62420  | 49.643  | 53.895   |
| 2     | 29.921    | 2125063 | 53398  | 50.357  | 46.105   |
| Total |           | 4219976 | 115819 | 100.000 | 100.000  |

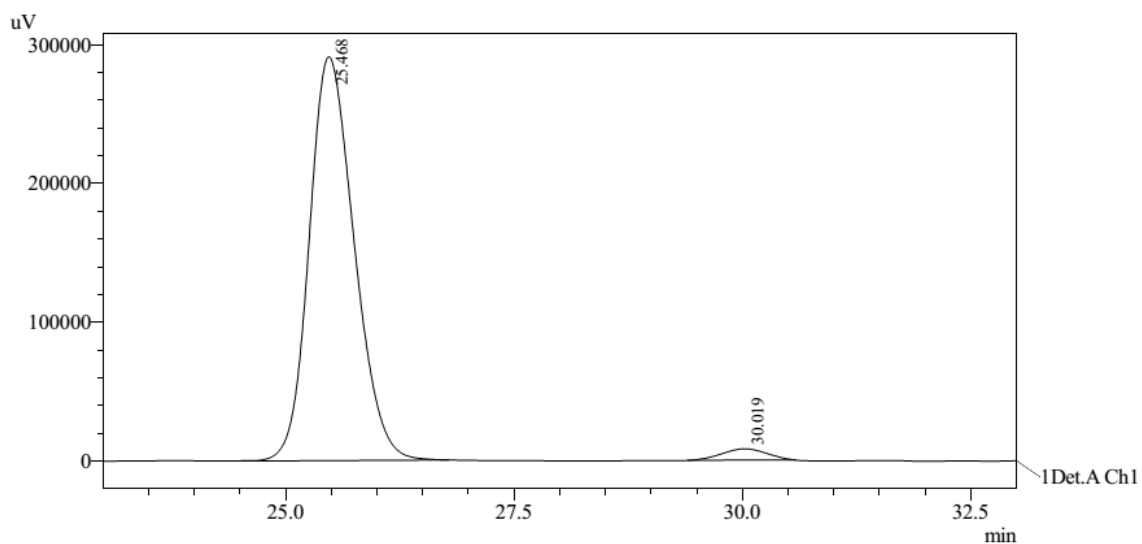

1 Det.A Ch1 / 254nm

PeakTable

检测器 A Ch1 254nm

| Peak# | Ret. Time | Area     | Height | Area %  | Height % |
|-------|-----------|----------|--------|---------|----------|
| 1     | 25.468    | 9951347  | 290912 | 97.258  | 97.282   |
| 2     | 30.019    | 280589   | 8127   | 2.742   | 2.718    |
| Total |           | 10231936 | 299040 | 100.000 | 100.000  |

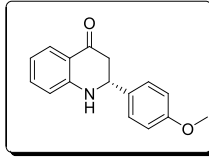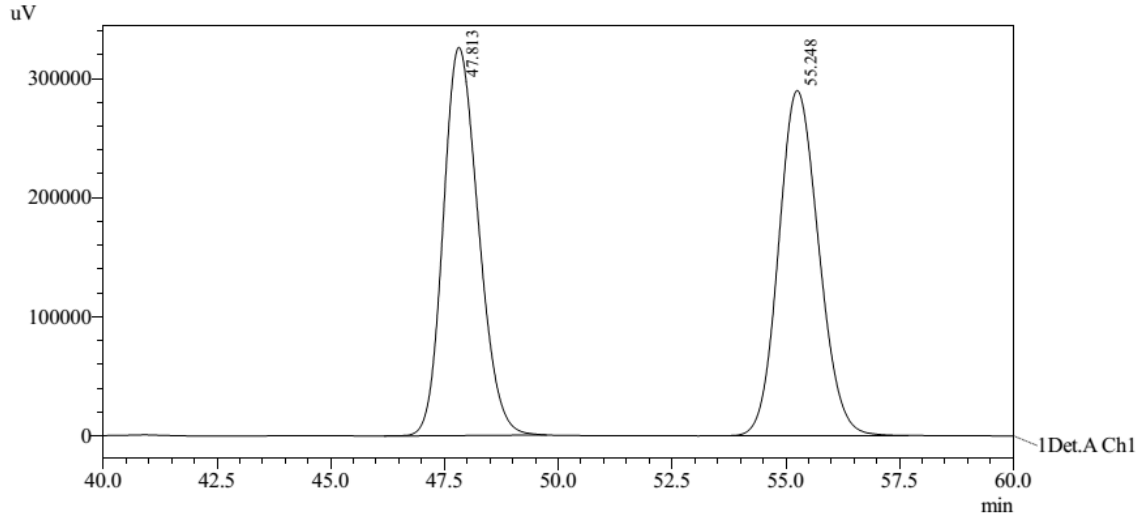

1 Det.A Ch1 / 254nm

PeakTable

检测器 A Ch1 254nm

| Peak# | Ret. Time | Area     | Height | Area %  | Height % |
|-------|-----------|----------|--------|---------|----------|
| 1     | 47.813    | 17558918 | 325965 | 49.697  | 52.922   |
| 2     | 55.248    | 17772686 | 289964 | 50.303  | 47.078   |
| Total |           | 35331605 | 615930 | 100.000 | 100.000  |

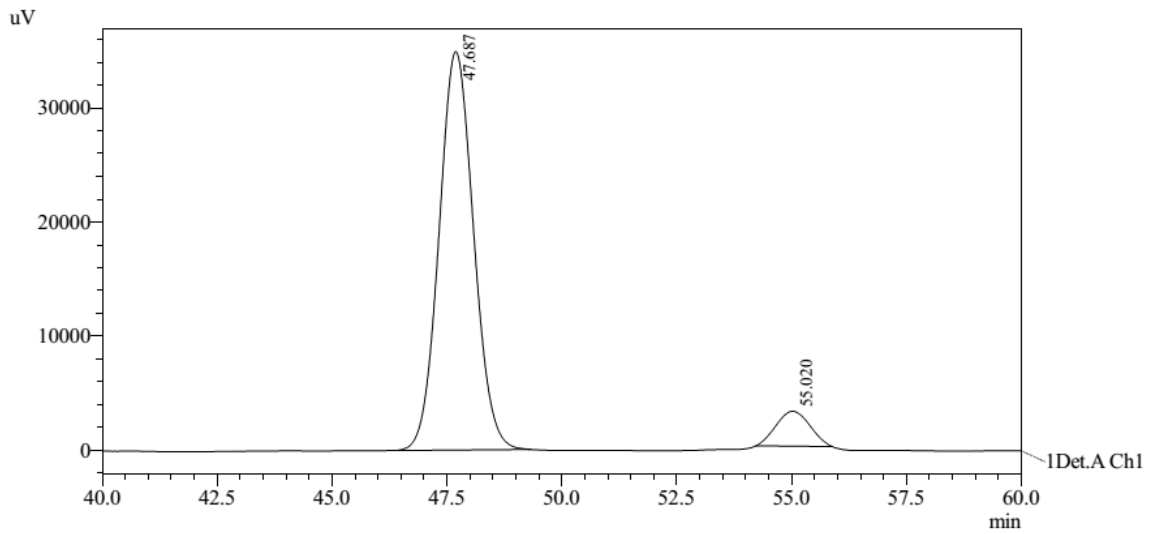

1 Det.A Ch1 / 254nm

PeakTable

检测器 A Ch1 254nm

| Peak# | Ret. Time | Area    | Height | Area %  | Height % |
|-------|-----------|---------|--------|---------|----------|
| 1     | 47.687    | 1827722 | 34934  | 92.091  | 91.956   |
| 2     | 55.020    | 156958  | 3056   | 7.909   | 8.044    |
| Total |           | 1984680 | 37989  | 100.000 | 100.000  |

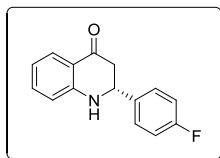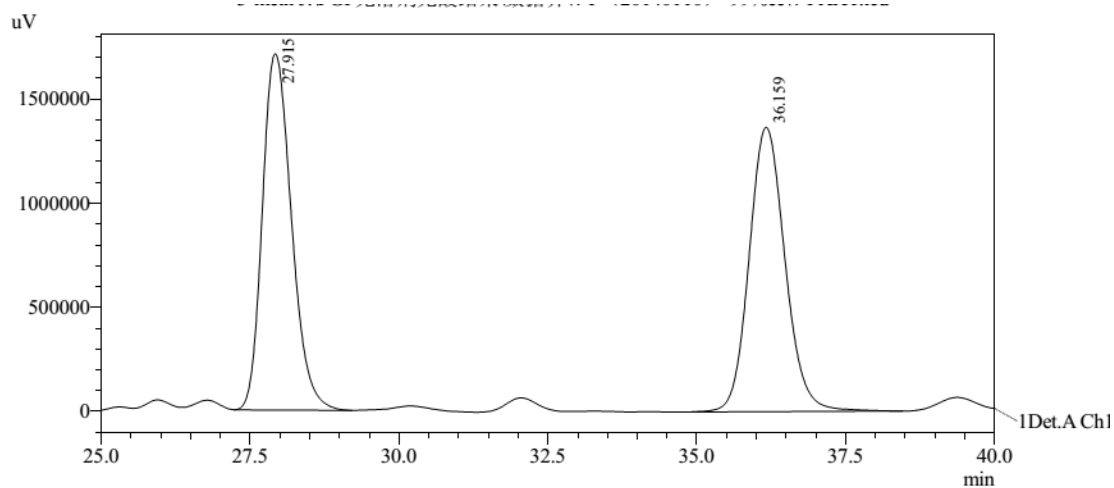

1 Det.A Ch1 / 214nm

PeakTable

检测器 A Ch1 214nm

| Peak# | Ret. Time | Area      | Height  | Area %  | Height % |
|-------|-----------|-----------|---------|---------|----------|
| 1     | 27.915    | 58185368  | 1709696 | 50.321  | 55.597   |
| 2     | 36.159    | 57442042  | 1365468 | 49.679  | 44.403   |
| Total |           | 115627410 | 3075164 | 100.000 | 100.000  |

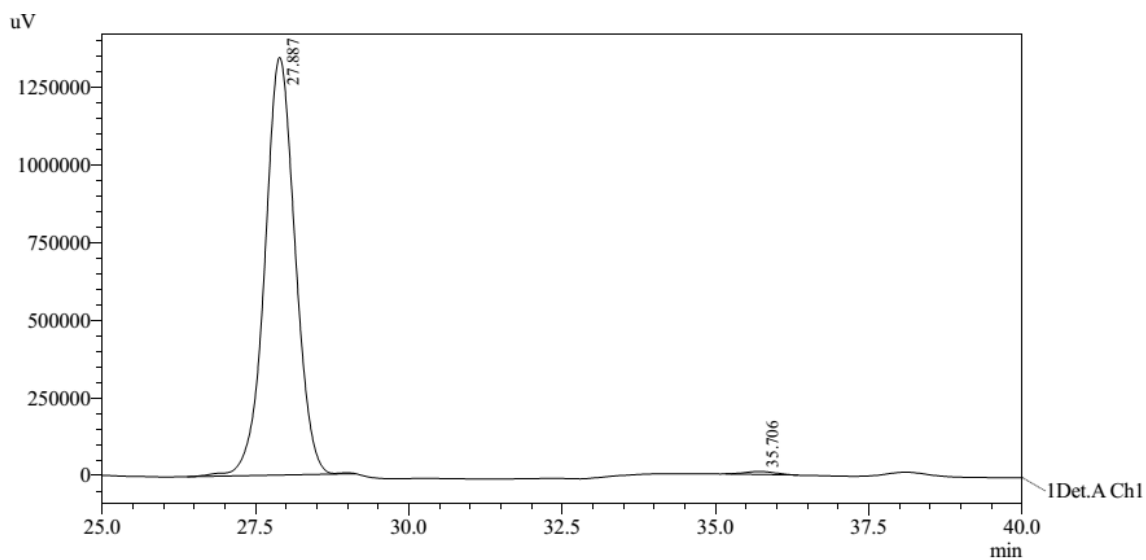

1 Det.A Ch1 / 214nm

PeakTable

检测器 A Ch1 214nm

| Peak# | Ret. Time | Area     | Height  | Area %  | Height % |
|-------|-----------|----------|---------|---------|----------|
| 1     | 27.887    | 46201997 | 1345823 | 99.282  | 99.293   |
| 2     | 35.706    | 333904   | 9584    | 0.718   | 0.707    |
| Total |           | 46535901 | 1355407 | 100.000 | 100.000  |



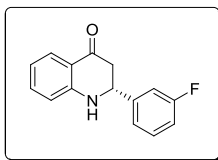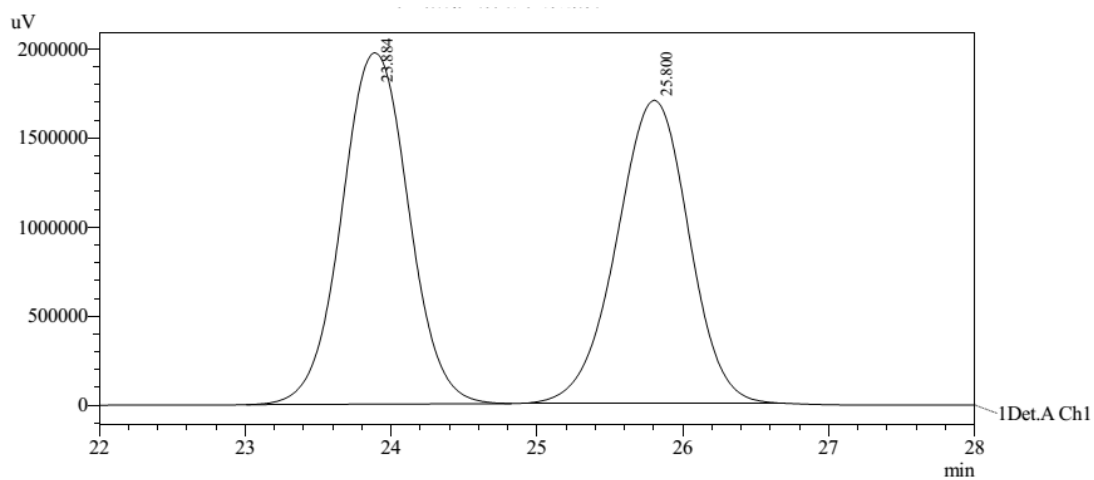

1 Det.A Ch1 / 214nm

PeakTable

检测器 A Ch1 214nm

| Peak# | Ret. Time | Area      | Height  | Area %  | Height % |
|-------|-----------|-----------|---------|---------|----------|
| 1     | 23.884    | 63047094  | 1971333 | 51.832  | 53.699   |
| 2     | 25.800    | 58589477  | 1699739 | 48.168  | 46.301   |
| Total |           | 121636571 | 3671072 | 100.000 | 100.000  |

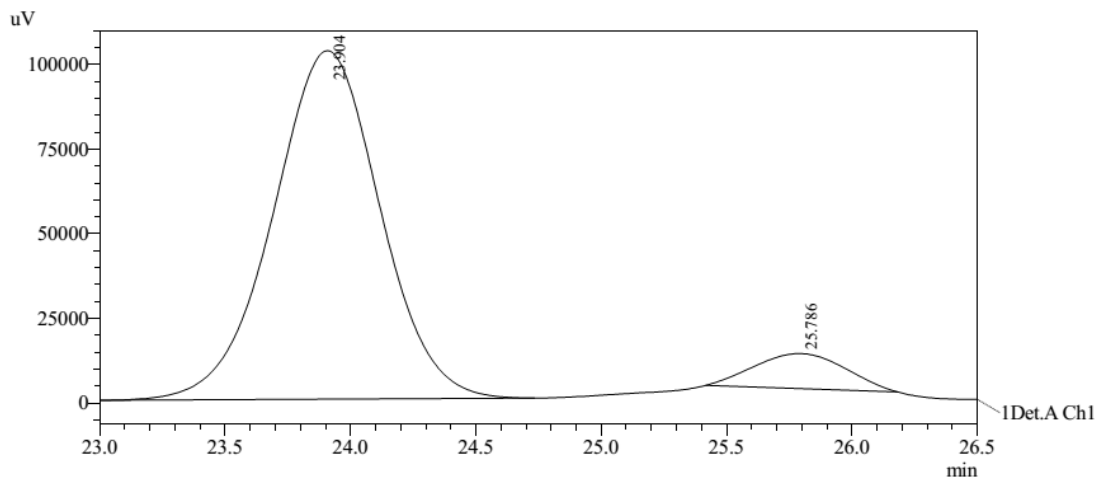

1 Det.A Ch1 / 214nm

PeakTable

检测器 A Ch1 214nm

| Peak# | Ret. Time | Area    | Height | Area %  | Height % |
|-------|-----------|---------|--------|---------|----------|
| 1     | 23.904    | 3054508 | 102987 | 92.127  | 90.880   |
| 2     | 25.786    | 261038  | 10335  | 7.873   | 9.120    |
| Total |           | 3315545 | 113323 | 100.000 | 100.000  |

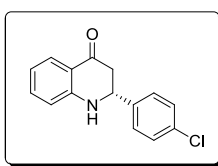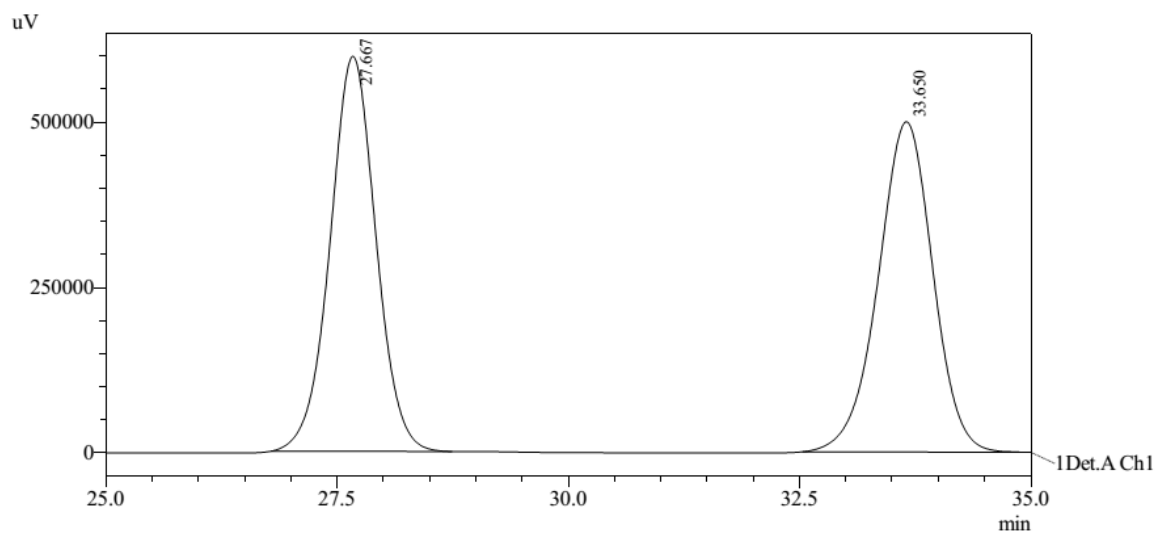

1 Det.A Ch1 / 214nm

PeakTable

检测器 A Ch1 214nm

| Peak# | Ret. Time | Area     | Height  | Area %  | Height % |
|-------|-----------|----------|---------|---------|----------|
| 1     | 27.667    | 20635220 | 597089  | 50.126  | 54.463   |
| 2     | 33.650    | 20531680 | 499240  | 49.874  | 45.537   |
| Total |           | 41166900 | 1096329 | 100.000 | 100.000  |

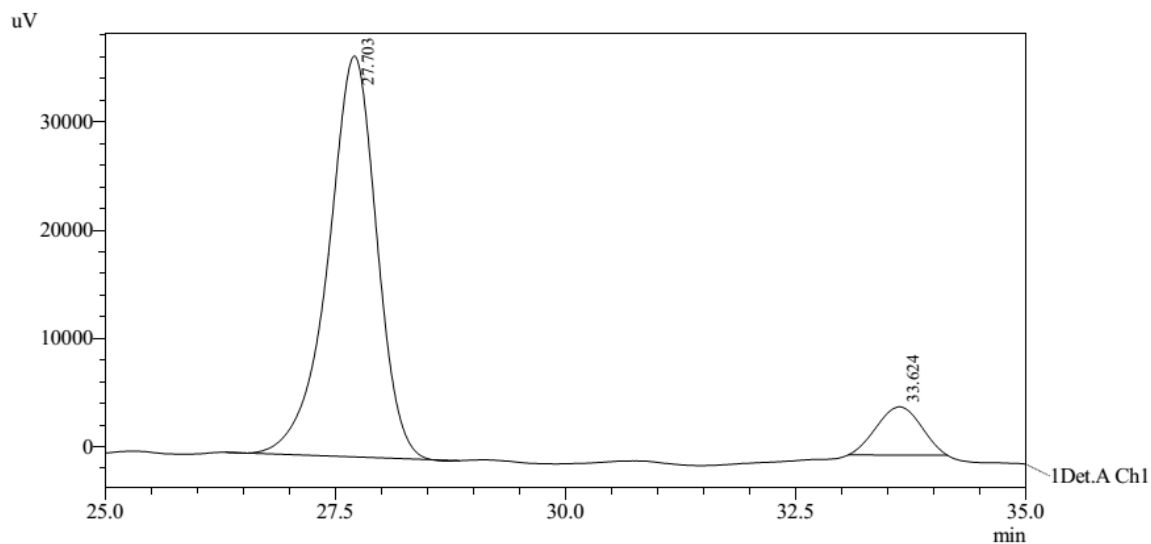

1 Det.A Ch1 / 214nm

PeakTable

检测器 A Ch1 214nm

| Peak# | Ret. Time | Area    | Height | Area %  | Height % |
|-------|-----------|---------|--------|---------|----------|
| 1     | 27.703    | 1359347 | 37005  | 90.066  | 89.264   |
| 2     | 33.624    | 149930  | 4451   | 9.934   | 10.736   |
| Total |           | 1509277 | 41456  | 100.000 | 100.000  |

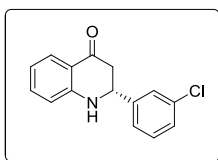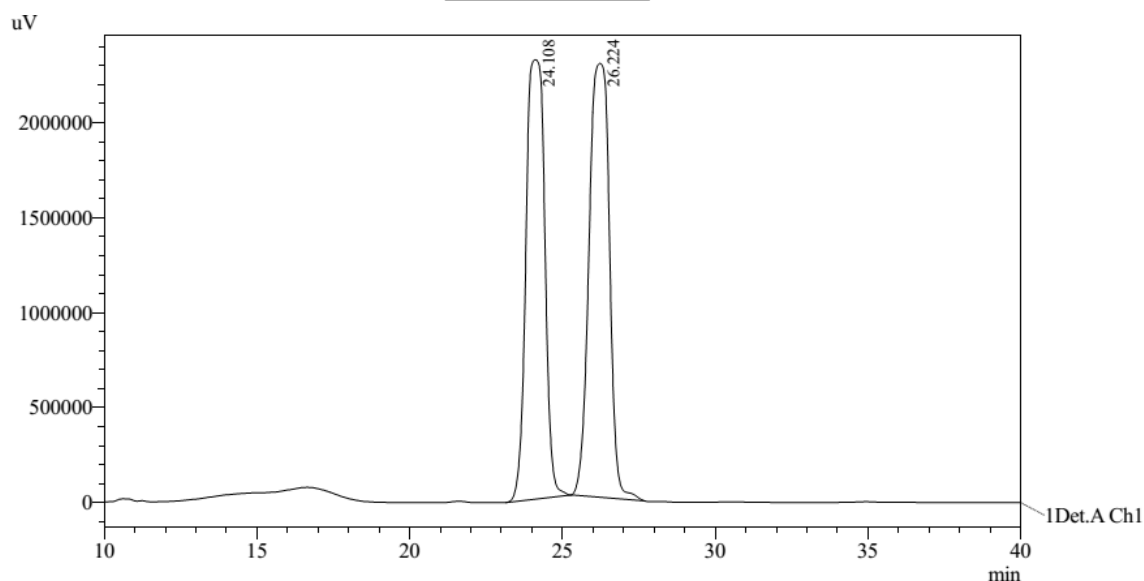

1 Det.A Ch1 / 214nm

PeakTable

检测器 A Ch1 214nm

| Peak# | Ret. Time | Area      | Height  | Area %  | Height % |
|-------|-----------|-----------|---------|---------|----------|
| 1     | 24.108    | 98878474  | 2312920 | 48.254  | 50.317   |
| 2     | 26.224    | 106035082 | 2283801 | 51.746  | 49.683   |
| Total |           | 204913556 | 4596720 | 100.000 | 100.000  |

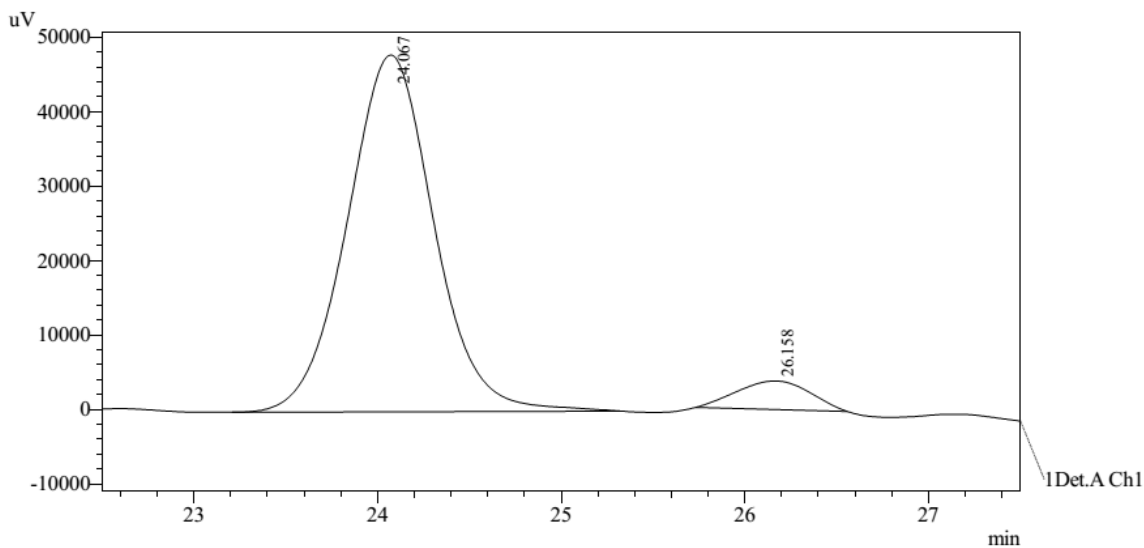

1 Det.A Ch1 / 214nm

PeakTable

检测器 A Ch1 214nm

| Peak# | Ret. Time | Area    | Height | Area %  | Height % |
|-------|-----------|---------|--------|---------|----------|
| 1     | 24.067    | 1568865 | 47905  | 93.672  | 92.591   |
| 2     | 26.158    | 105993  | 3833   | 6.328   | 7.409    |
| Total |           | 1674858 | 51738  | 100.000 | 100.000  |

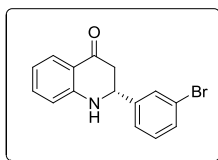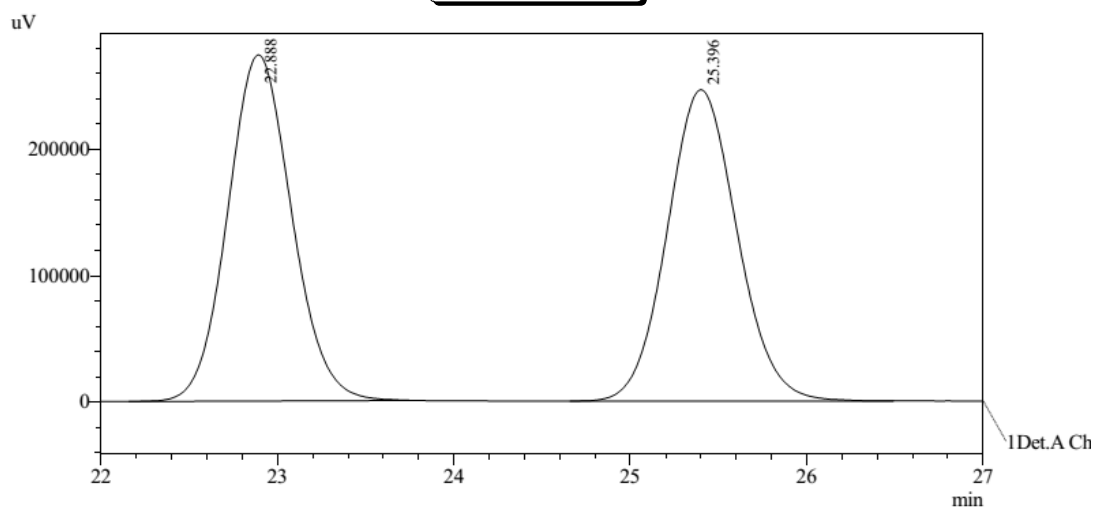

1 Det.A Ch1 / 214nm

PeakTable

检测器 A Ch1 214nm

| Peak# | Ret. Time | Area     | Height | Area %  | Height % |
|-------|-----------|----------|--------|---------|----------|
| 1     | 22.888    | 6911281  | 274085 | 50.370  | 52.637   |
| 2     | 25.396    | 6809734  | 246627 | 49.630  | 47.363   |
| Total |           | 13721016 | 520712 | 100.000 | 100.000  |

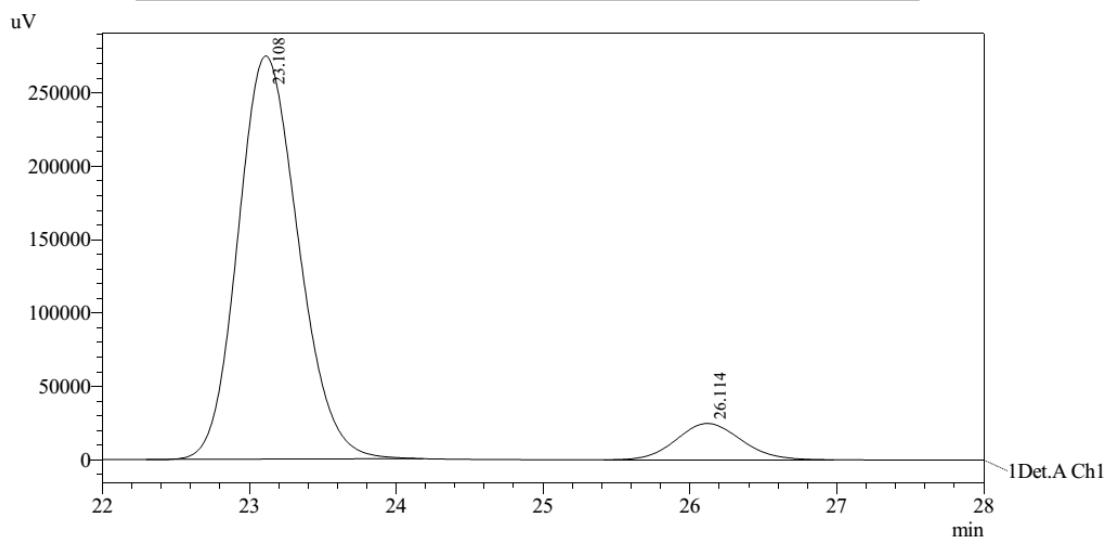

1 Det.A Ch1 / 254nm

PeakTable

检测器 A Ch1 254nm

| Peak# | Ret. Time | Area    | Height | Area %  | Height % |
|-------|-----------|---------|--------|---------|----------|
| 1     | 23.108    | 7845742 | 274510 | 91.195  | 91.751   |
| 2     | 26.114    | 757489  | 24681  | 8.805   | 8.249    |
| Total |           | 8603230 | 299191 | 100.000 | 100.000  |

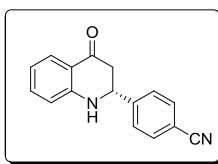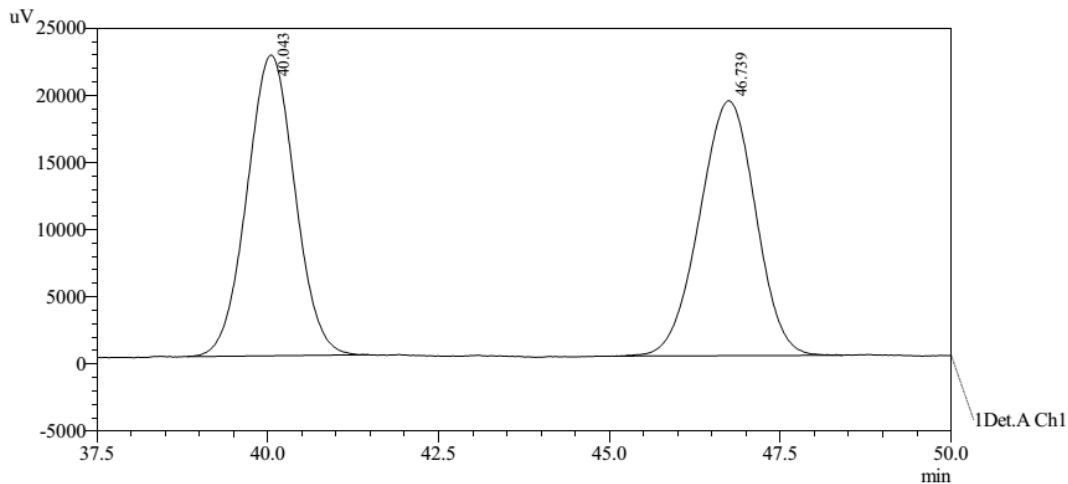

1 Det.A Ch1 / 214nm

PeakTable

检测器 A Ch1 214nm

| Peak# | Ret. Time | Area    | Height | Area %  | Height % |
|-------|-----------|---------|--------|---------|----------|
| 1     | 40.043    | 1093378 | 22390  | 50.184  | 54.128   |
| 2     | 46.739    | 1085357 | 18975  | 49.816  | 45.872   |
| Total |           | 2178735 | 41365  | 100.000 | 100.000  |

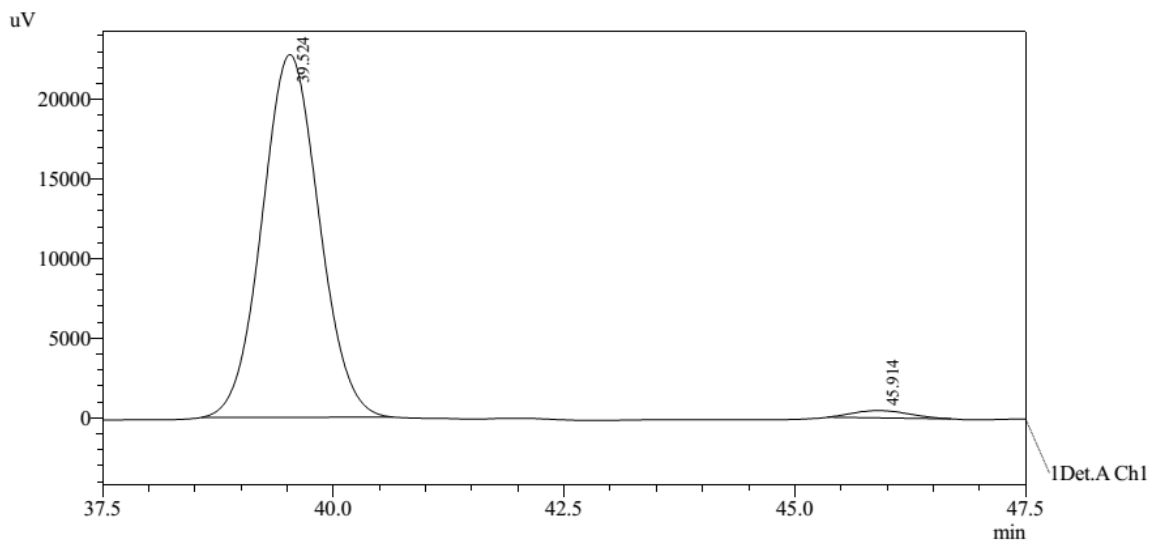

1 Det.A Ch1 / 254nm

PeakTable

检测器 A Ch1 254nm

| Peak# | Ret. Time | Area   | Height | Area %  | Height % |
|-------|-----------|--------|--------|---------|----------|
| 1     | 39.524    | 979196 | 22774  | 98.033  | 97.982   |
| 2     | 45.914    | 19642  | 469    | 1.967   | 2.018    |
| Total |           | 998839 | 23243  | 100.000 | 100.000  |

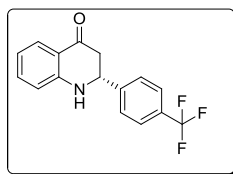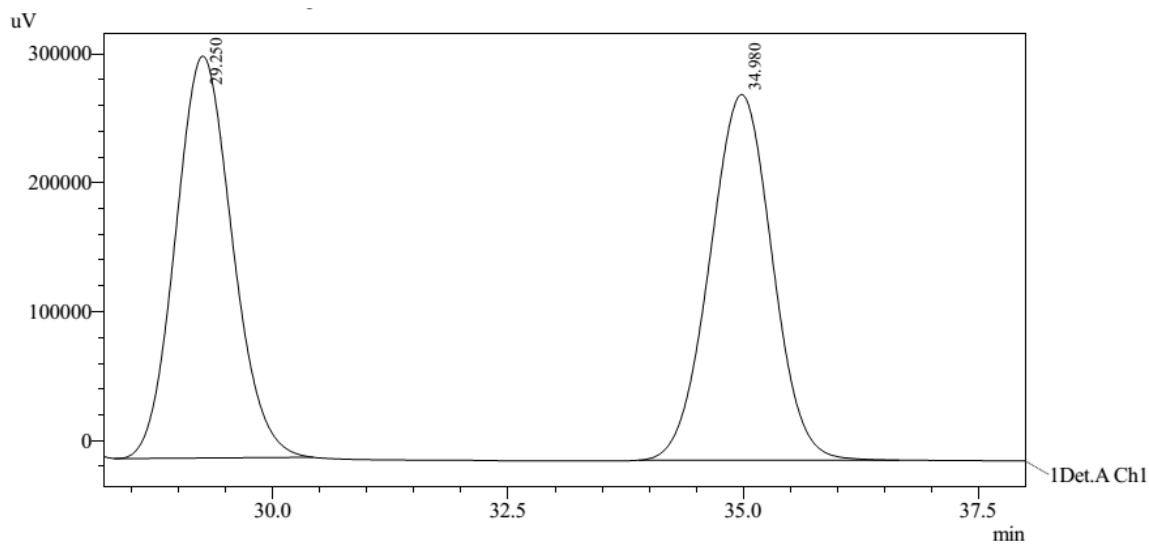

1 Det.A Ch1 / 214nm

PeakTable

检测器 A Ch1 214nm

| Peak# | Ret. Time | Area     | Height | Area %  | Height % |
|-------|-----------|----------|--------|---------|----------|
| 1     | 29.250    | 13083240 | 311709 | 49.954  | 52.354   |
| 2     | 34.980    | 13107368 | 283681 | 50.046  | 47.646   |
| Total |           | 26190608 | 595390 | 100.000 | 100.000  |

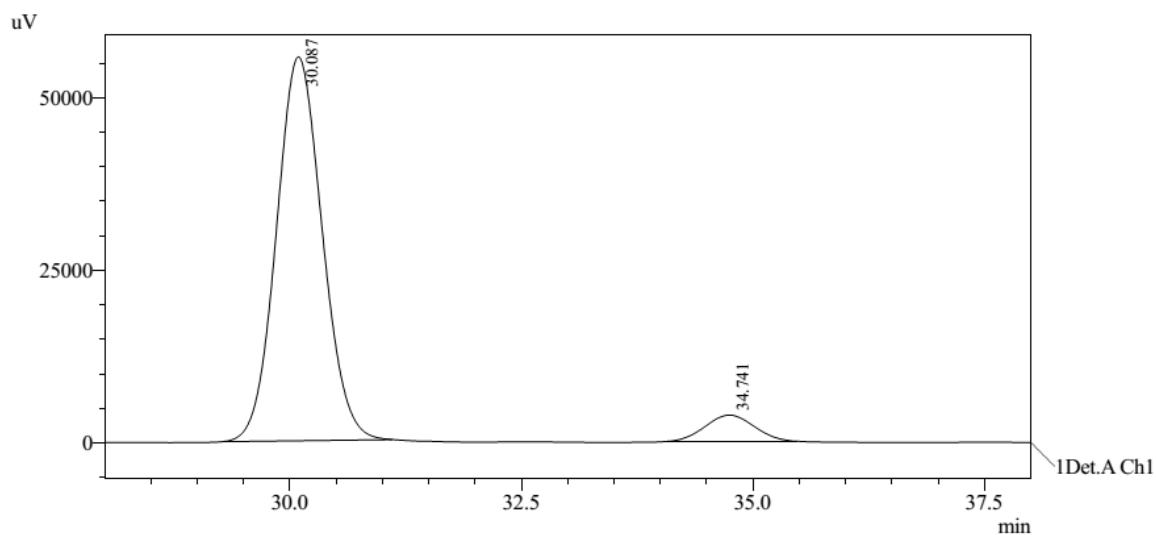

1 Det.A Ch1 / 254nm

PeakTable

检测器 A Ch1 254nm

| Peak# | Ret. Time | Area    | Height | Area %  | Height % |
|-------|-----------|---------|--------|---------|----------|
| 1     | 30.087    | 1915886 | 55658  | 93.148  | 93.603   |
| 2     | 34.741    | 140926  | 3804   | 6.852   | 6.397    |
| Total |           | 2056812 | 59462  | 100.000 | 100.000  |

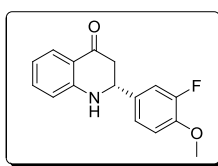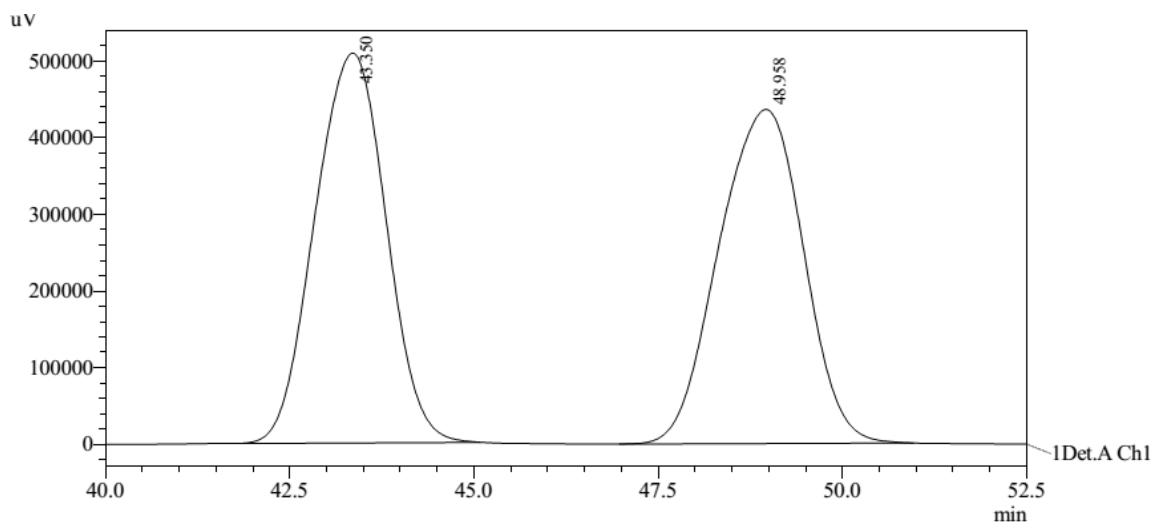

1 Det.A Ch1 / 254nm

PeakTable

检测器 A Ch1 254nm

| Peak# | Ret. Time | Area     | Height | Area %  | Height % |
|-------|-----------|----------|--------|---------|----------|
| 1     | 43.350    | 34261232 | 508640 | 49.521  | 53.848   |
| 2     | 48.958    | 34924369 | 435939 | 50.479  | 46.152   |
| Total |           | 69185601 | 944579 | 100.000 | 100.000  |

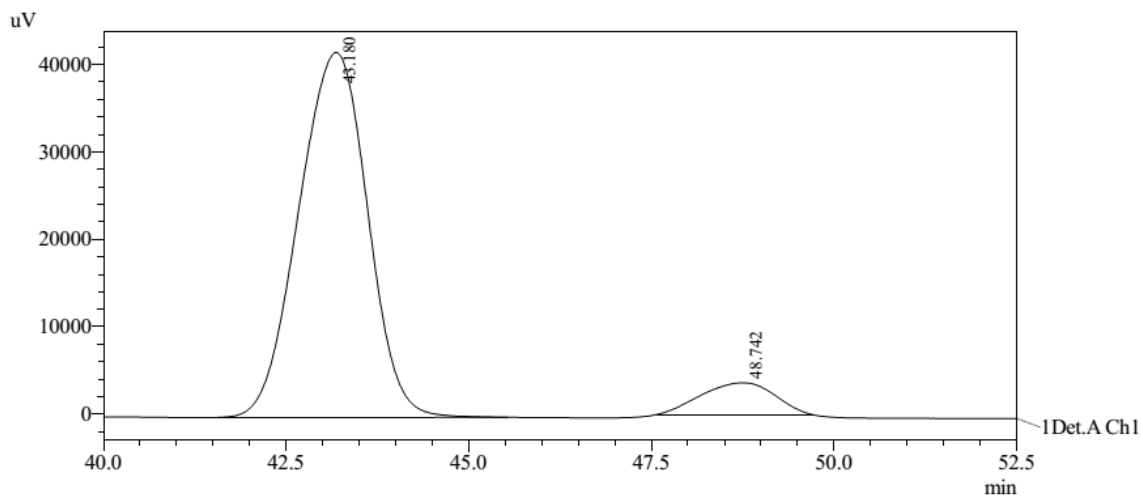

1 Det.A Ch1 / 254nm

PeakTable

检测器 A Ch1 254nm

| Peak# | Ret. Time | Area    | Height | Area %  | Height % |
|-------|-----------|---------|--------|---------|----------|
| 1     | 43.180    | 2736125 | 41746  | 91.470  | 91.969   |
| 2     | 48.742    | 255167  | 3646   | 8.530   | 8.031    |
| Total |           | 2991292 | 45391  | 100.000 | 100.000  |

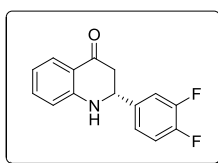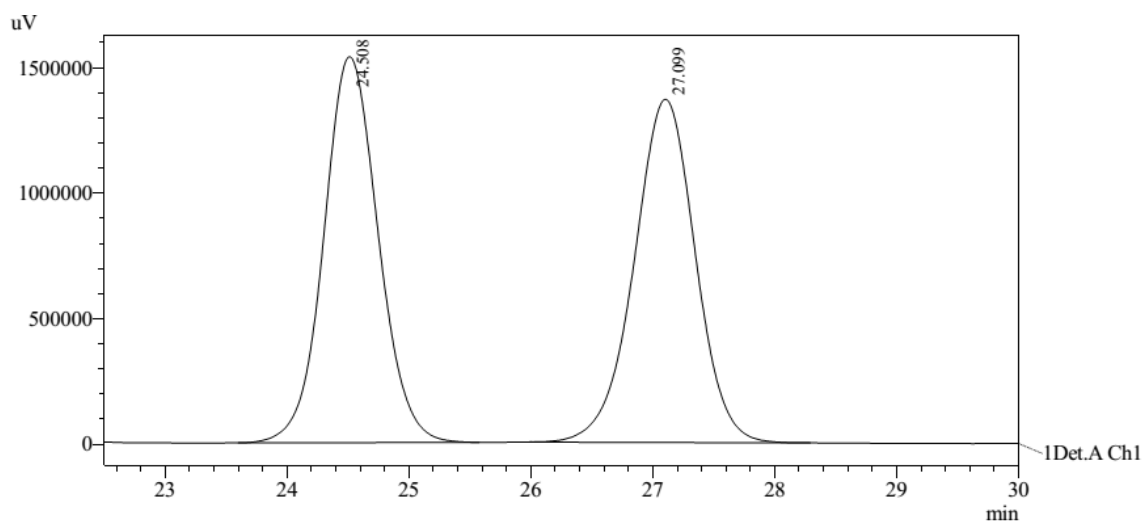

1 Det.A Ch1 / 214nm

PeakTable

检测器 A Ch1 214nm

| Peak# | Ret. Time | Area     | Height  | Area %  | Height % |
|-------|-----------|----------|---------|---------|----------|
| 1     | 24.508    | 47771466 | 1537486 | 49.969  | 52.933   |
| 2     | 27.099    | 47831470 | 1367097 | 50.031  | 47.067   |
| Total |           | 95602936 | 2904582 | 100.000 | 100.000  |

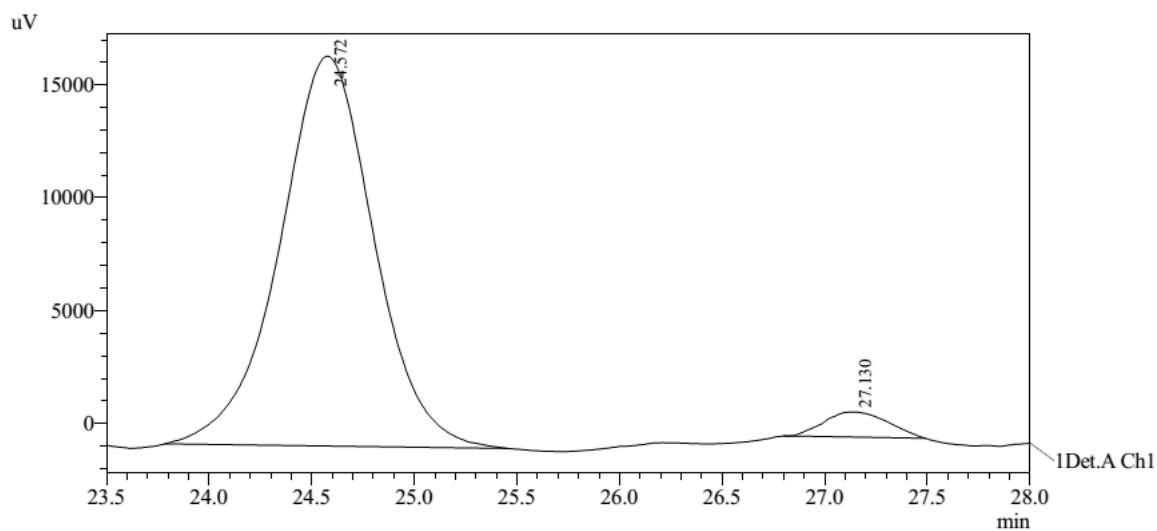

1 Det.A Ch1 / 214nm

PeakTable

检测器 A Ch1 214nm

| Peak# | Ret. Time | Area   | Height | Area %  | Height % |
|-------|-----------|--------|--------|---------|----------|
| 1     | 24.572    | 551622 | 17274  | 95.813  | 93.967   |
| 2     | 27.130    | 24103  | 1109   | 4.187   | 6.033    |
| Total |           | 575725 | 18383  | 100.000 | 100.000  |



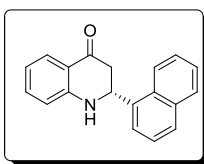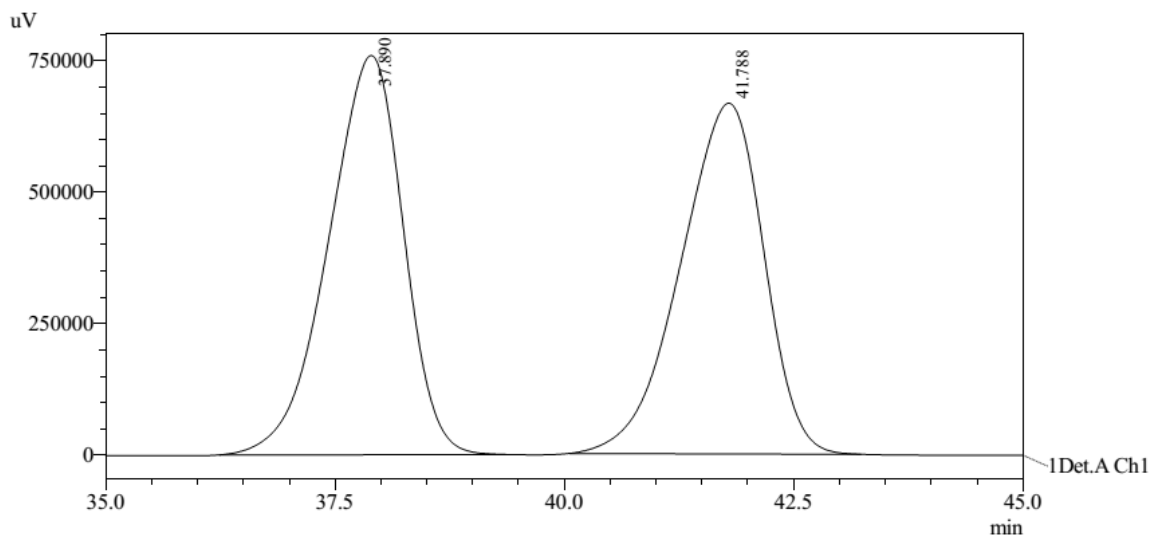

1 Det.A Ch1 / 214nm

PeakTable

检测器 A Ch1 214nm

| Peak# | Ret. Time | Area     | Height  | Area %  | Height % |
|-------|-----------|----------|---------|---------|----------|
| 1     | 37.890    | 43129737 | 759112  | 50.540  | 53.227   |
| 2     | 41.788    | 42207700 | 667065  | 49.460  | 46.773   |
| Total |           | 85337437 | 1426177 | 100.000 | 100.000  |

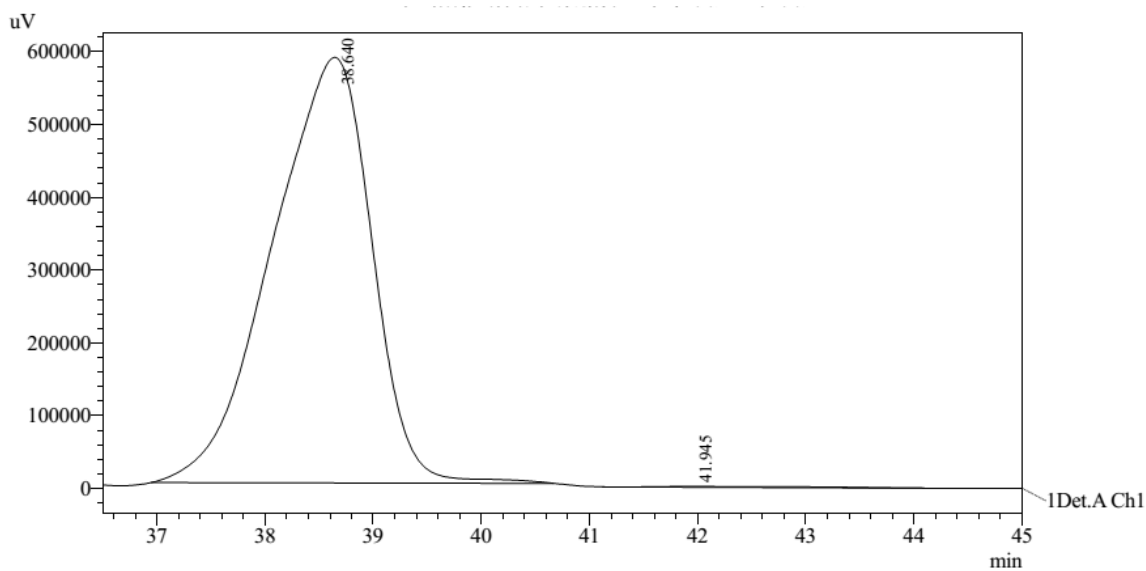

1 Det.A Ch1 / 214nm

PeakTable

检测器 A Ch1 214nm

| Peak# | Ret. Time | Area     | Height | Area %  | Height % |
|-------|-----------|----------|--------|---------|----------|
| 1     | 38.640    | 37473410 | 584542 | 99.710  | 99.843   |
| 2     | 41.945    | 109009   | 917    | 0.290   | 0.157    |
| Total |           | 37582419 | 585459 | 100.000 | 100.000  |

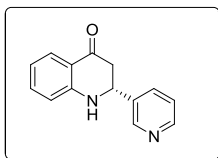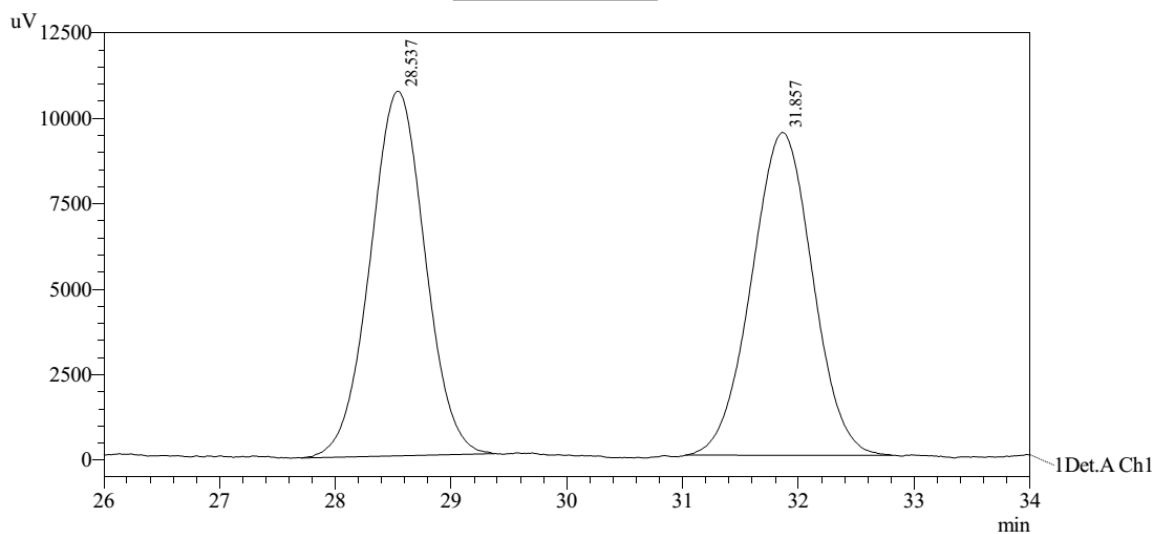

1 Det.A Ch1 / 214nm

PeakTable

检测器 A Ch1 214nm

| Peak# | Ret. Time | Area   | Height | Area %  | Height % |
|-------|-----------|--------|--------|---------|----------|
| 1     | 28.537    | 351505 | 10666  | 50.331  | 53.043   |
| 2     | 31.857    | 346878 | 9442   | 49.669  | 46.957   |
| Total |           | 698383 | 20108  | 100.000 | 100.000  |

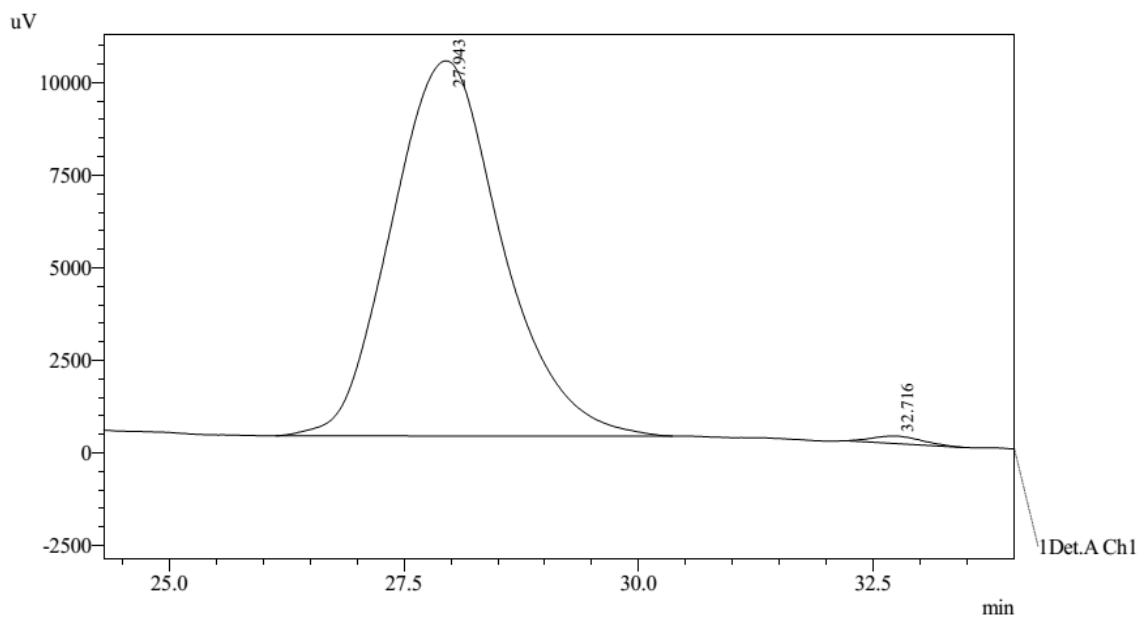

1 Det.A Ch1 / 254nm

PeakTable

检测器 A Ch1 254nm

| Peak# | Ret. Time | Area   | Height | Area %  | Height % |
|-------|-----------|--------|--------|---------|----------|
| 1     | 27.943    | 828580 | 10135  | 99.125  | 98.062   |
| 2     | 32.716    | 7318   | 200    | 0.875   | 1.938    |
| Total |           | 835898 | 10335  | 100.000 | 100.000  |

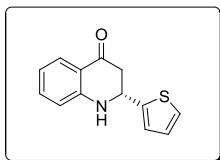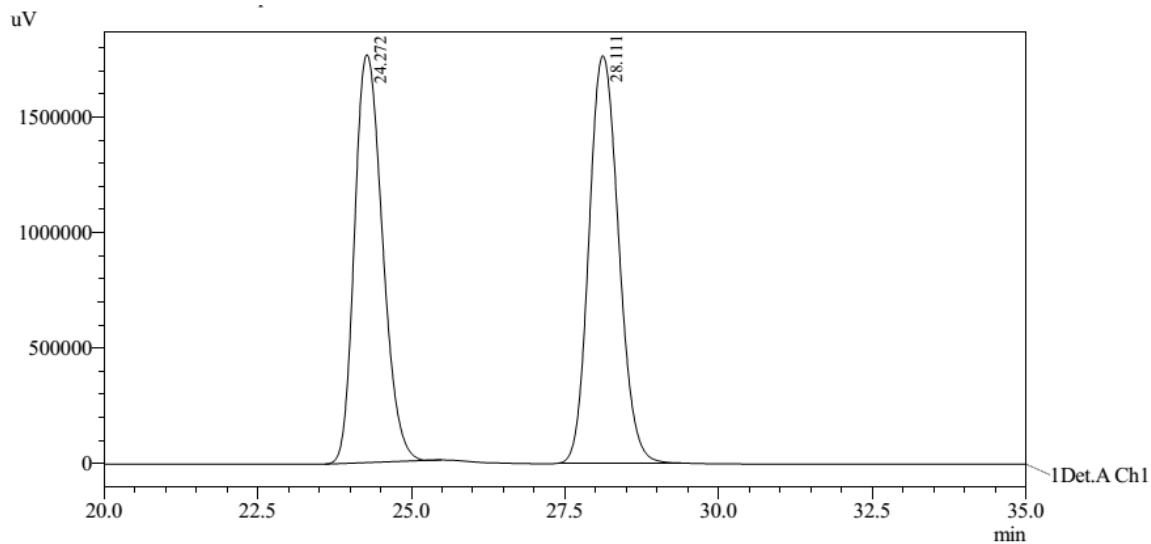

1 Det.A Ch1 / 254nm

PeakTable

| Peak# | Ret. Time | Area      | Height  | Area %  | Height % |
|-------|-----------|-----------|---------|---------|----------|
| 1     | 24.272    | 55785385  | 1764938 | 48.572  | 50.049   |
| 2     | 28.111    | 59065021  | 1761490 | 51.428  | 49.951   |
| Total |           | 114850406 | 3526428 | 100.000 | 100.000  |

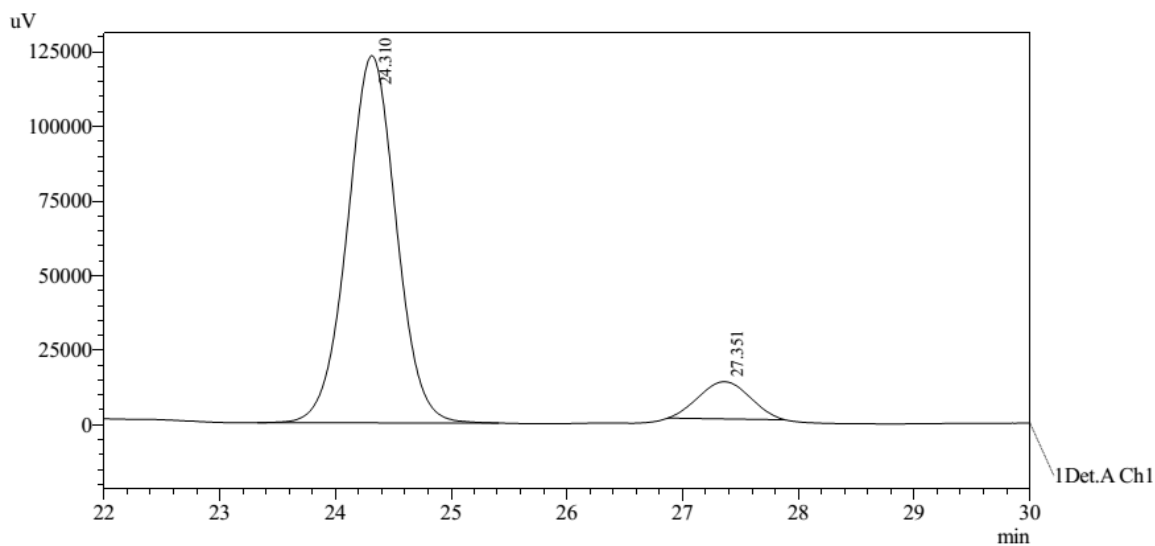

1 Det.A Ch1 / 214nm

PeakTable

| Peak# | Ret. Time | Area    | Height | Area %  | Height % |
|-------|-----------|---------|--------|---------|----------|
| 1     | 24.310    | 3617303 | 123018 | 90.422  | 90.823   |
| 2     | 27.351    | 383160  | 12430  | 9.578   | 9.177    |
| Total |           | 4000463 | 135448 | 100.000 | 100.000  |

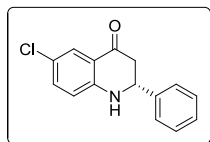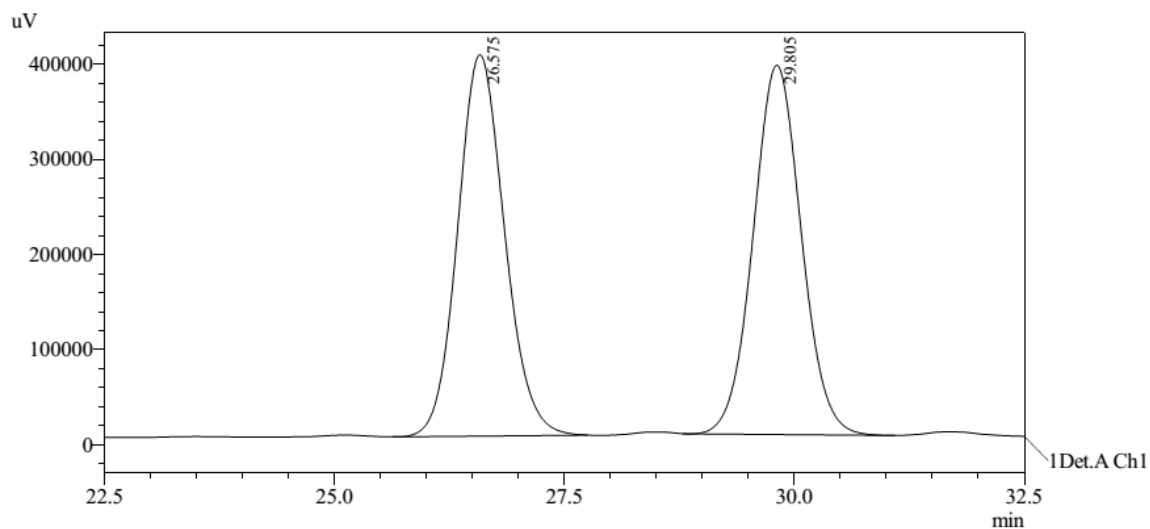

1 Det.A Ch1 / 214nm

PeakTable

检测器 A Ch1 214nm

| Peak# | Ret. Time | Area     | Height | Area %  | Height % |
|-------|-----------|----------|--------|---------|----------|
| 1     | 26.575    | 14226420 | 401140 | 50.112  | 50.809   |
| 2     | 29.805    | 14162847 | 388365 | 49.888  | 49.191   |
| Total |           | 28389267 | 789505 | 100.000 | 100.000  |

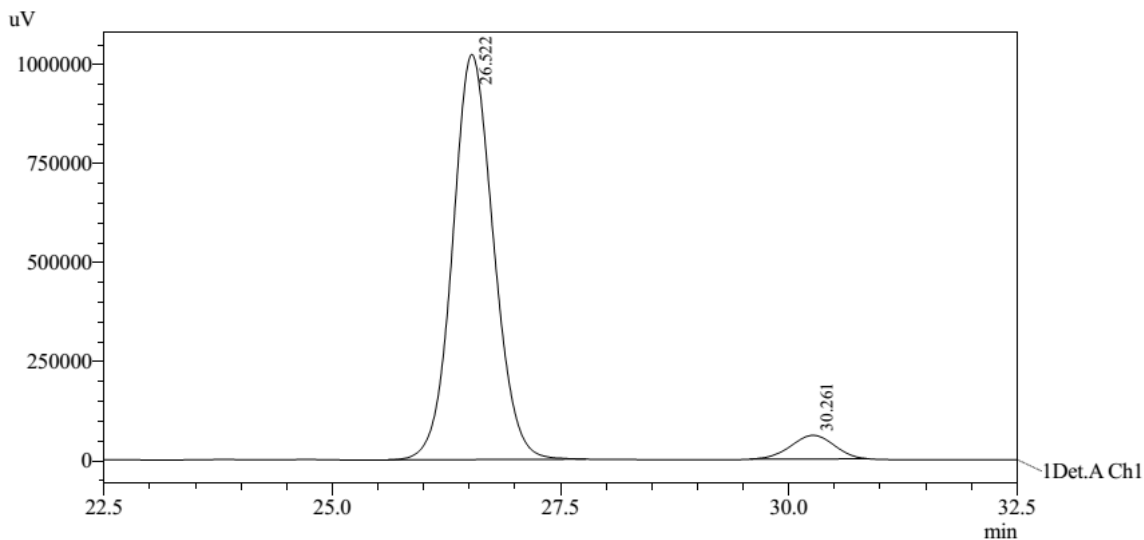

1 Det.A Ch1 / 214nm

PeakTable

检测器 A Ch1 214nm

| Peak# | Ret. Time | Area     | Height  | Area %  | Height % |
|-------|-----------|----------|---------|---------|----------|
| 1     | 26.522    | 31898220 | 1022741 | 94.154  | 94.480   |
| 2     | 30.261    | 1980459  | 59753   | 5.846   | 5.520    |
| Total |           | 33878679 | 1082495 | 100.000 | 100.000  |

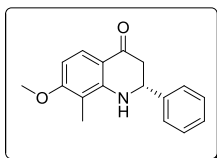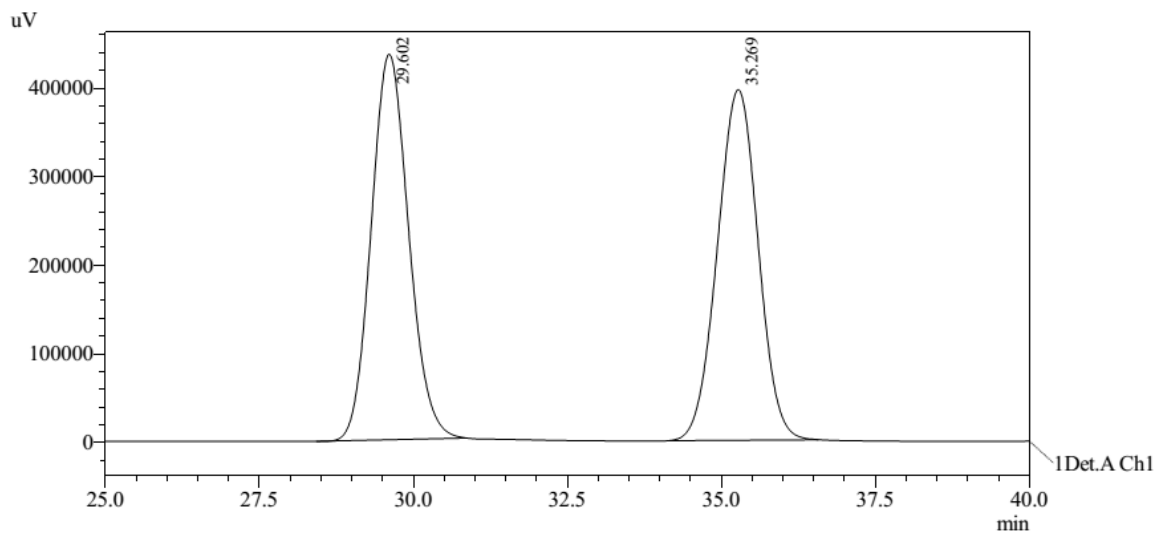

1 Det.A Ch1 / 214nm

PeakTable

检测器 A Ch1 214nm

| Peak# | Ret. Time | Area     | Height | Area %  | Height % |
|-------|-----------|----------|--------|---------|----------|
| 1     | 29.602    | 18417001 | 435114 | 50.225  | 52.363   |
| 2     | 35.269    | 18251708 | 395843 | 49.775  | 47.637   |
| Total |           | 36668709 | 830957 | 100.000 | 100.000  |

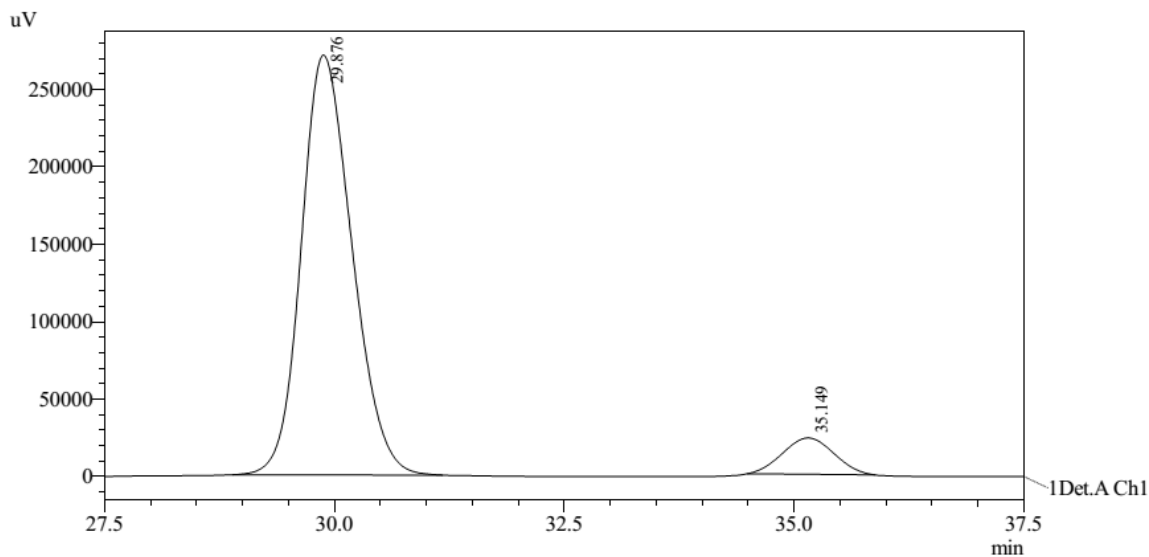

1 Det.A Ch1 / 254nm

PeakTable

检测器 A Ch1 254nm

| Peak# | Ret. Time | Area     | Height | Area %  | Height % |
|-------|-----------|----------|--------|---------|----------|
| 1     | 29.876    | 10423856 | 271112 | 91.930  | 92.035   |
| 2     | 35.149    | 915021   | 23462  | 8.070   | 7.965    |
| Total |           | 11338877 | 294574 | 100.000 | 100.000  |

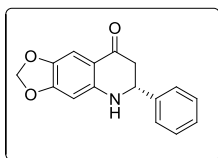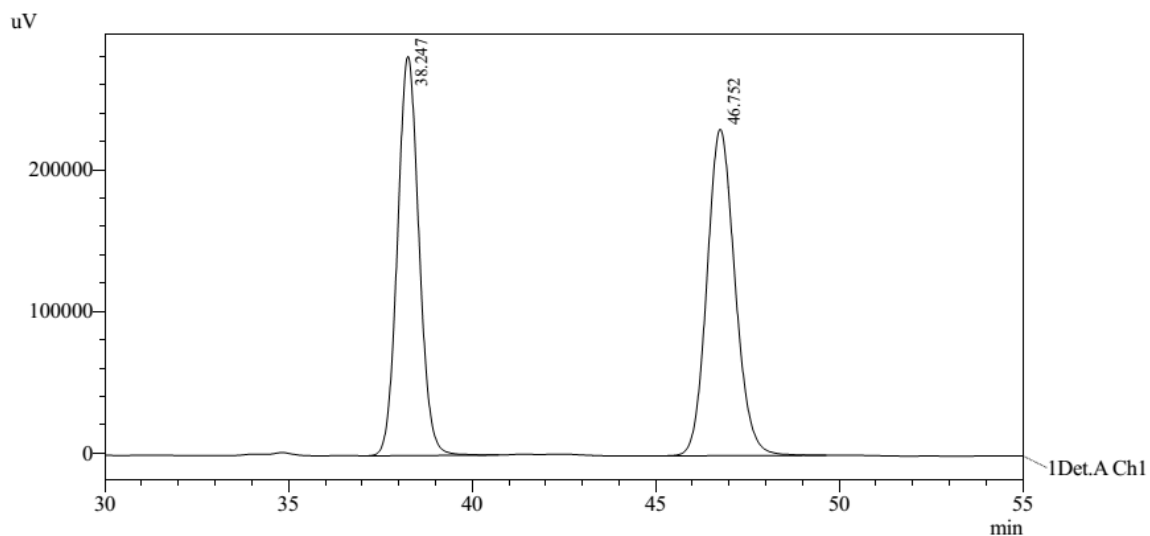

1 Det.A Ch1 / 214nm

PeakTable

检测器 A Ch1 214nm

| Peak# | Ret. Time | Area     | Height | Area %  | Height % |
|-------|-----------|----------|--------|---------|----------|
| 1     | 38.247    | 11485643 | 281760 | 48.398  | 55.023   |
| 2     | 46.752    | 12246194 | 230318 | 51.602  | 44.977   |
| Total |           | 23731838 | 512078 | 100.000 | 100.000  |

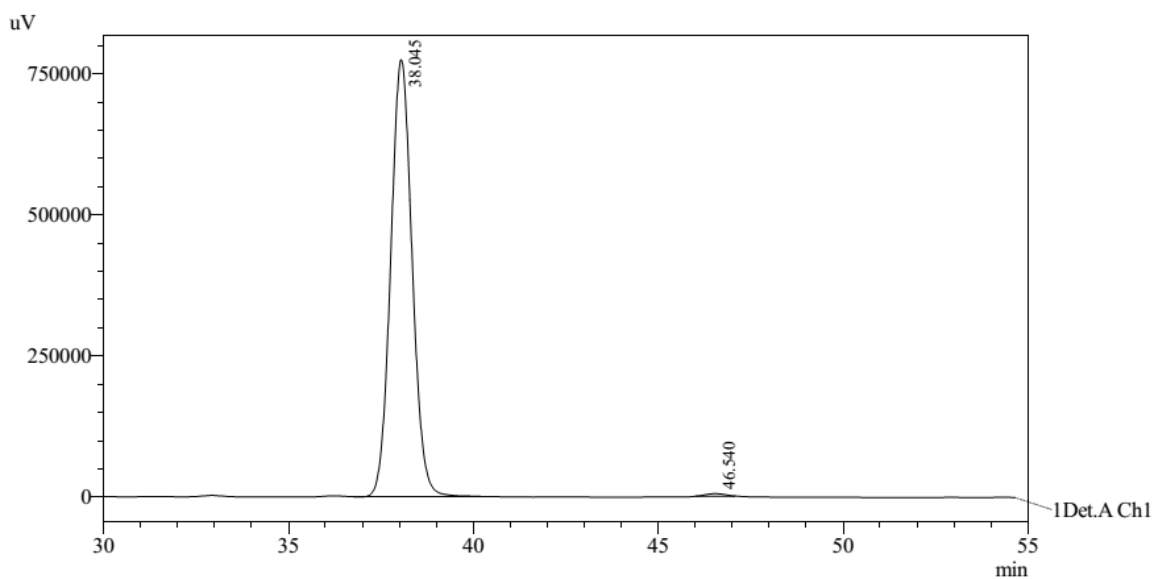

1 Det.A Ch1 / 214nm

PeakTable

检测器 A Ch1 214nm

| Peak# | Ret. Time | Area     | Height | Area %  | Height % |
|-------|-----------|----------|--------|---------|----------|
| 1     | 38.045    | 31238175 | 775189 | 99.498  | 99.453   |
| 2     | 46.540    | 157472   | 4263   | 0.502   | 0.547    |
| Total |           | 31395647 | 779452 | 100.000 | 100.000  |

## 6. <sup>1</sup>HNMR, <sup>13</sup>CNMR and HRMS for the mechanism

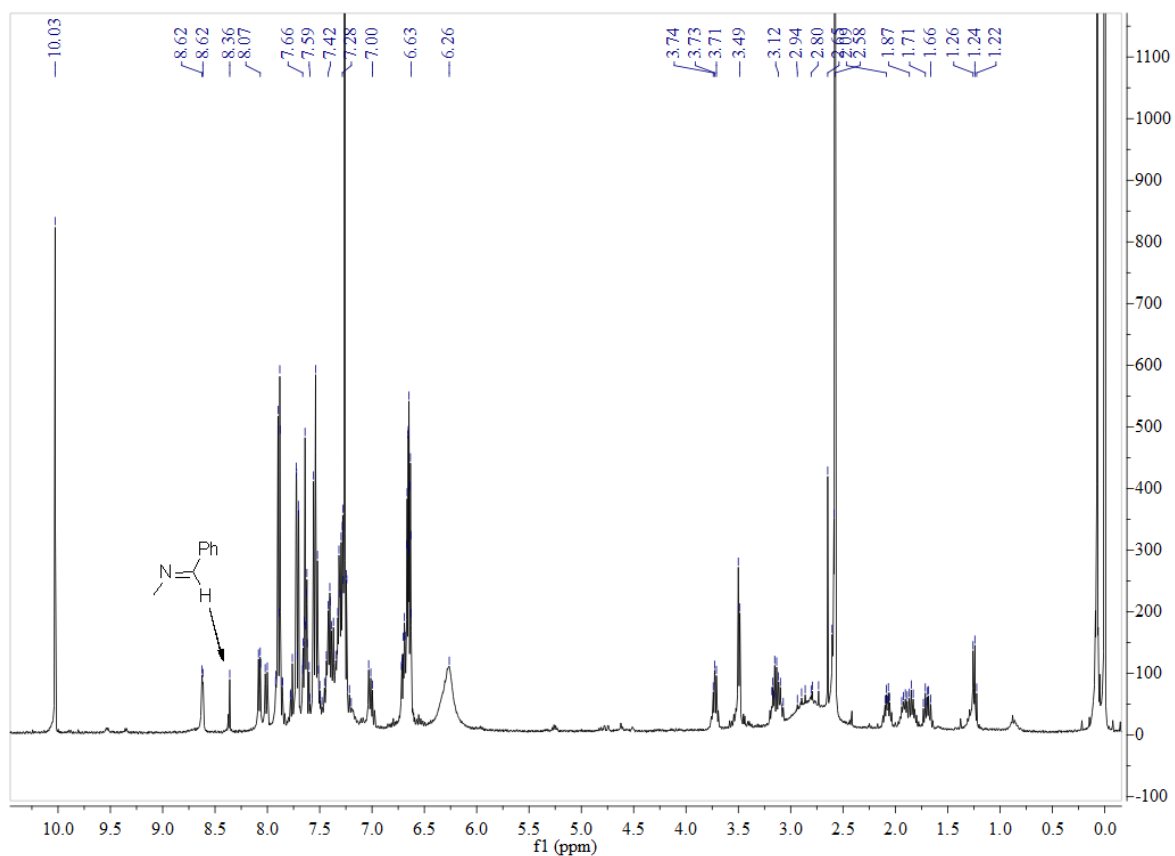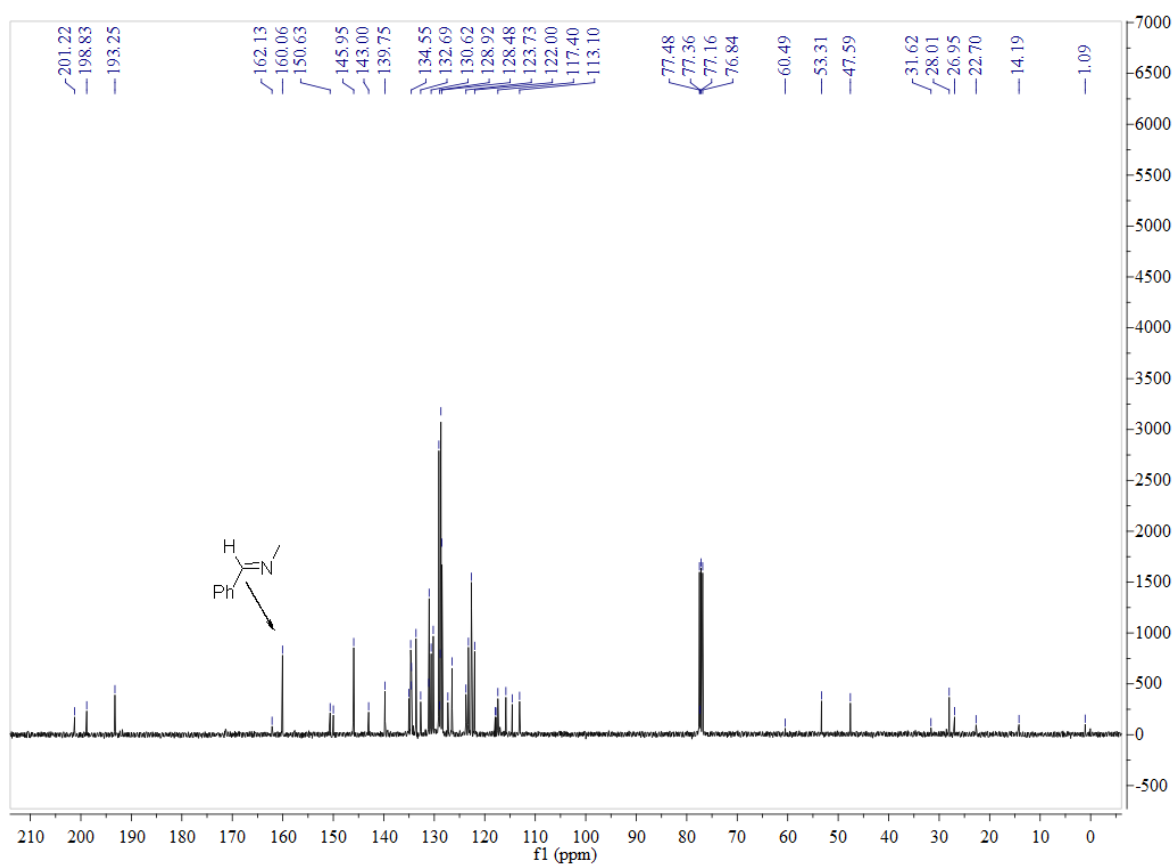

# Mass Spectrum SmartFormula Report

**Analysis Info**

|               |                                                                |                   |                     |
|---------------|----------------------------------------------------------------|-------------------|---------------------|
| Analysis Name | G:\±»ú»Ælé[ª]»úÁiÑD¾¿¿\β·Ö±æ\wangyongqiang-20150618-pgf-0112.d | Acquisition Date  | 2015/6/18 15:09:10  |
| Method        | tune_low 50-500.m                                              | Operator          | NWU                 |
| Sample Name   |                                                                | Instrument / Ser# | microTOF-Q II 10280 |
| Comment       |                                                                |                   |                     |

**Acquisition Parameter**

|             |            |                       |           |                  |           |
|-------------|------------|-----------------------|-----------|------------------|-----------|
| Source Type | ESI        | Ion Polarity          | Positive  | Set Nebulizer    | 0.4 Bar   |
| Focus       | Not active | Set Capillary         | 4500 V    | Set Dry Heater   | 180 °C    |
| Scan Begin  | 50 m/z     | Set End Plate Offset  | -500 V    | Set Dry Gas      | 4.0 l/min |
| Scan End    | 3000 m/z   | Set Collision Cell RF | 110.0 Vpp | Set Divert Valve | Source    |

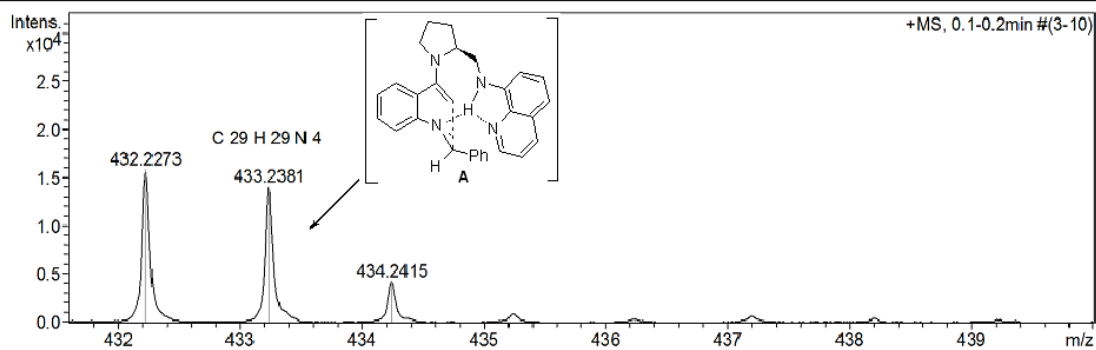

| Meas. m/z | # | Formula       | m/z      | err [ppm] | Mean err [ppm] | rdb  | N-Rule | e;¶ Conf | mSig ma | Std I  | Std Mean m/z | Std I VarN orm | Std m/z Diff | Std Com b Dev |
|-----------|---|---------------|----------|-----------|----------------|------|--------|----------|---------|--------|--------------|----------------|--------------|---------------|
| 433.2381  | 1 | C 29 H 29 N 4 | 433.2387 | 1.3       | 1.2            | 17.5 | ok     | even     | 29.21   | 0.0447 | 0.0005       | 0.0229         | 0.0001       | 0.8427        |



## 7. X-Ray structure of 3a, 3l

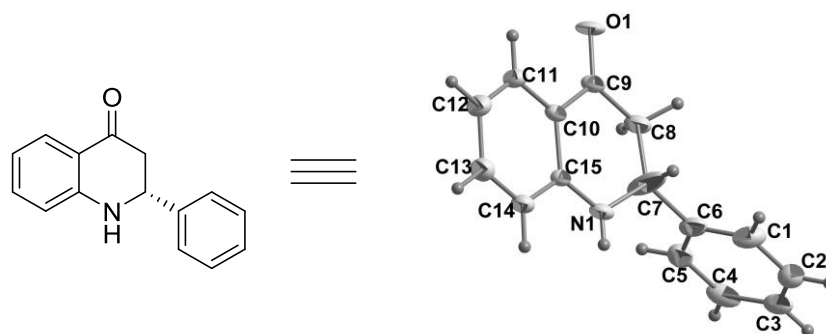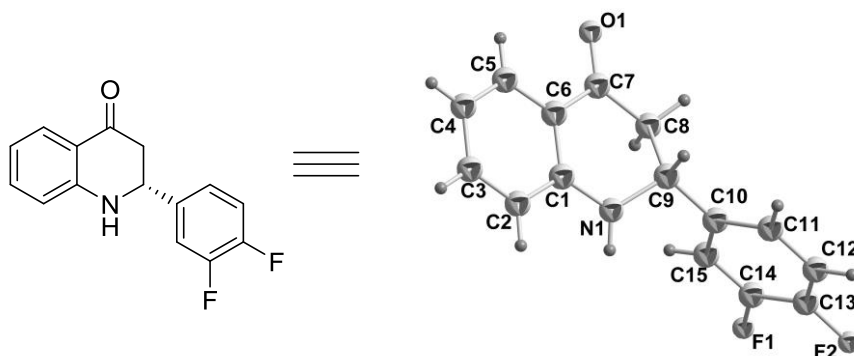

Supplement: c6ra01247g1.pdf [file c6ra01247g1.pdf]
